# Supplementary material for: Evaluating antibiotic stewardship in a tertiary care hospital in Kerala, India: a qualitative interview study
Source: PubMed Central journal article supplement — BMJ Open. 2019 May 14;9(5):e026193. doi: 10.1136/bmjopen-2018-026193 (PMC6530383; doi:10.1136/bmjopen-2018-026193), 2019-05-14
Supplement: bmjopen-2018-026193.draft_revisions.pdf [file bmjopen-2018-026193.draft_revisions.pdf]

# BMJ Open

BMJ Open is committed to open peer review. As part of this commitment we make the peer review history of every article we publish publicly available.

When an article is published we post the peer reviewers' comments and the authors' responses online. We also post the versions of the paper that were used during peer review. These are the versions that the peer review comments apply to.

The versions of the paper that follow are the versions that were submitted during the peer review process. They are not the versions of record or the final published versions. They should not be cited or distributed as the published version of this manuscript.

BMJ Open is an open access journal and the full, final, typeset and author-corrected version of record of the manuscript is available on our site with no access controls, subscription charges or pay-per-view fees (<http://bmjopen.bmj.com>).

If you have any questions on BMJ Open's open peer review process please email [info.bmjopen@bmj.com](mailto:info.bmjopen@bmj.com)

# BMJ Open

## Evaluating Antibiotic Stewardship at a Tertiary Care Hospital in Kerala, India

|                               |                                                                                                                                                                                                                                                                                                                                                                                                                                                                                                                                                                                                                                                                                                                                                               |
|-------------------------------|---------------------------------------------------------------------------------------------------------------------------------------------------------------------------------------------------------------------------------------------------------------------------------------------------------------------------------------------------------------------------------------------------------------------------------------------------------------------------------------------------------------------------------------------------------------------------------------------------------------------------------------------------------------------------------------------------------------------------------------------------------------|
| Journal:                      | <i>BMJ Open</i>                                                                                                                                                                                                                                                                                                                                                                                                                                                                                                                                                                                                                                                                                                                                               |
| Manuscript ID                 | bmjopen-2018-026193                                                                                                                                                                                                                                                                                                                                                                                                                                                                                                                                                                                                                                                                                                                                           |
| Article Type:                 | Research                                                                                                                                                                                                                                                                                                                                                                                                                                                                                                                                                                                                                                                                                                                                                      |
| Date Submitted by the Author: | 11-Sep-2018                                                                                                                                                                                                                                                                                                                                                                                                                                                                                                                                                                                                                                                                                                                                                   |
| Complete List of Authors:     | Baubie, Kelsey; University of Wisconsin Madison, Infectious Disease<br>Shaughnessy, Catherine; University of Wisconsin Madison, Infectious Disease<br>Kostiuk, Lia; University of Wisconsin Madison<br>Joseph, Mariam; Amrita Institute of Medical Sciences and Research Centre, Pharmacy<br>Safdar, Nasia ; University of Wisconsin Madison, Infectious Disease; William S. Middleton Memorial Veterans Hospital, Research<br>Singh, Sanjeev; Amrita Institute of Medical Sciences and Research Centre, Hospital Administration<br>Siraj, Dawd; University of Wisconsin Madison, Infectious Disease<br>Sethi, Ajay; University of Wisconsin Madison, Population Health Sciences<br>Keating, Julie; William S. Middleton Memorial Veterans Hospital, Research |
| Keywords:                     | PUBLIC HEALTH, QUALITATIVE RESEARCH, INFECTIOUS DISEASES                                                                                                                                                                                                                                                                                                                                                                                                                                                                                                                                                                                                                                                                                                      |
|                               |                                                                                                                                                                                                                                                                                                                                                                                                                                                                                                                                                                                                                                                                                                                                                               |

SCHOLARONE™  
Manuscripts

Only

## Evaluating Antibiotic Stewardship at a Tertiary Care Hospital in Kerala, India

Kelsey Baubie, MS, MPH\*<sup>1</sup>, Catherine Shaughnessy, BS\*<sup>1</sup>, Lia Kostiuk, MD<sup>1</sup>, Mariam Varsha Joseph, PharmD<sup>2</sup>, Nasia Safdar MD, PhD<sup>1,4</sup>, Sanjeev Singh, MBBS, PhD, MPhil, DCH<sup>3</sup>, Dawd Siraj, MD, MPH<sup>1</sup>, Ajay Sethi, PhD<sup>5</sup>, Julie Keating, PhD<sup>4</sup>

\*denotes equal contribution

1. Department of Infectious Disease, University of Wisconsin Madison School of Medicine and Public Health, Madison, Wisconsin, USA

2. Department of Pharmacy, Amrita Institute of Medical Sciences and Research Centre, Cochin, Kerala, India

3. Department of Hospital Administration, Amrita Institute of Medical Sciences and Research Centre, Cochin, Kerala, India

4. Department of Research, William S. Middleton Memorial Veterans Administration Hospital, Madison, Wisconsin, USA

5. Department of Population Health Sciences, University of Wisconsin Madison School of Medicine and Public Health, Madison, Wisconsin, USA

Corresponding author:

Kelsey Baubie, Clinical Science Center, 600 Highland Ave Madison WI 53792

Phone 608-262-9223

Email [baubie@wisc.edu](mailto:baubie@wisc.edu)

Email addresses for other authors: Catherine Shaughnessy, [ceshaugh@medicine.wisc.edu](mailto:ceshaugh@medicine.wisc.edu)

Lia Kostiuk, [lkostiuk@wisc.edu](mailto:lkostiuk@wisc.edu)

Mariam Varsha Joseph, [mariamvj@aims.amrita.edu](mailto:mariamvj@aims.amrita.edu)

Nasia Safdar, [ns2@medicine.wisc.edu](mailto:ns2@medicine.wisc.edu)

Sanjeev Singh, [sanjeevksingh@aims.amrita.edu](mailto:sanjeevksingh@aims.amrita.edu)

Dawd Siraj, [dssiraj@medicine.wisc.edu](mailto:dssiraj@medicine.wisc.edu)

Ajay Sethi, [aksethi@wisc.edu](mailto:aksethi@wisc.edu)

Julie Keating, [jakeating@medicine.wisc.edu](mailto:jakeating@medicine.wisc.edu)

Word count of manuscript body: 2,427

Contributorship Statement: KB and CS created the interview guides, wrote the manuscript, and conducted on-site data collection. LK assisted with on-site data collection, writing and editing of the manuscript. MVJ assisted with on-site data collection and editing of the manuscript. NS and SS edited the manuscript and devised the project. DS assisted with writing and editing the manuscript. AS helped with the grant and edited the manuscript. JK edited the manuscript.

1  
2  
3  
4 Data sharing statement: No additional data available.  
5

6 Funding: This project was funded by the University of Wisconsin Global Health Institute.

7  
8 Conflict of interests: None of the authors report any conflict of interests.  
9

## 10 11 12 13 14 Abstract

15  
16  
17 Objectives: To conduct interviews with healthcare professionals to determine what  
18 barriers and facilitators to antibiotic stewardship existed within their facility.  
19

20  
21 Setting: 1300 bed tertiary care private hospital located in the state of Kerala, India.  
22

23 Participants: 31 semi-structured interviews and 4 focus groups with hospital staff ranging  
24 from physicians, nurses, pharmacists, and a clinical microbiologist.  
25

26 Results: Key facilitators of AS at the hospital included a dedicated committee overseeing  
27 appropriate inpatient antibiotic use, a highly capable and prompt microbiology lab, a high  
28 level of AS understanding among staff, established guidelines for empiric prescribing, and  
29 an easily-accessible antibiogram. We identified the following barriers: limited access to  
30 clinical pharmacists, physician immunity to change regarding stewardship policies,  
31 infrequent antibiotic de-escalation, high physician workload, an incomplete electronic  
32 medical record (EMR), inadequate ASP physical visibility, and high antibiotic use in the  
33 community.  
34  
35

36  
37 Conclusions: Opportunities for improvement at this institution include increasing  
38 accessibility to clinical pharmacists, implementing strategies to overcome physician  
39 immunity to change, and establishing a more accessible and complete EMR. Our findings  
40 are likely to be of use to institutions developing ASPs in lower resource settings.  
41  
42

43 Keywords: Antibiotic stewardship, antibiotic stewardship programs, antibiotic resistance,  
44 India, SEIPS  
45  
46  
47  
48  
49  
50  
51  
52  
53  
54

55 Strengths and limitations of this study  
56  
57  
58  
59  
60

- Our study is the first of its kind to systematically examine the key barriers and facilitators of implementing an ASP in a LMIC.
- We interviewed a variety of healthcare workers: physicians, nurses, clinical pharmacists, and a microbiologist.
- This was a single center study. Thus, transferability of our findings to more resource-limited rural hospitals within India or to other LMIC may not be possible.
- We did not conduct direct observations of practice to correlate with self-reporting.

## **BMJ Summary Box**

### What is already known?

- Antibiotic resistance is a growing area of concern in healthcare settings around the world, and LMIC often face disproportionately high rates of resistant infections
- Antibiotic stewardship programs have been found to help foster judicious antibiotic use.

### What are the new findings?

- Our study is the first of its kind to systematically examine the key barriers and facilitators of implementing an ASP in a LMIC.
- Facilitators include a proactive ASP with committed leadership, highly capable and prompt microbiology lab, broad understanding of AS concept among staff, easily accessible antibiogram, and established guidelines for empiric prescribing
- Barriers include limited access to clinical pharmacists, physician immunity to change, high physician workload, lack of antibiotic de-escalation, incomplete EMR, inadequate physical visibility of stewardship activities, and widespread community antibiotic use

### What do the new findings imply?

- The careful design of ASP with consideration to overcoming barriers and strengthening facilitators will improve antibiotic use and curve the spread of resistant organisms.
- Hospitals in LMIC should invest in ASP with consideration to variables which are easily implemented and cost effective in their unique setting. Launching and sustaining a new program will be more feasible if hospital leadership is supportive and the stewardship team meets daily to discuss cases.

## Background

The United Nations declared antimicrobial resistance to be “the greatest and most urgent global risk” in 2016<sup>1</sup>. Antibiotic overuse and misuse drives antimicrobial

1  
2  
3 resistance<sup>2</sup>. Antibiotic resistant infections frequently occur as healthcare associated  
4 infections, and most deaths from antibiotic resistance take place in inpatient healthcare  
5 settings<sup>3</sup>. In developing countries, the risk of contracting an antibiotic resistant healthcare-  
6 associated infection may be two to 20 times higher than in developed countries<sup>4</sup>. This  
7 discrepancy is likely due to factors such as over prescribing and the widespread availability  
8 of antibiotics without prescription<sup>5,6</sup>. The same situation exists in India, where rates of  
9 infections caused by antibiotic resistant bacteria are high and increasing<sup>7-15</sup>. Given that the  
10 main driver of antibiotic resistance is antibiotic use and misuse, antibiotic stewardship  
11 (AS) and antibiotic stewardship programs (ASP) have a critical role in promoting judicious  
12 antibiotic use<sup>16</sup>.

13  
14  
15 In a recent review of ASP international programs, Davey et al. found ASPs were  
16 effective in decreasing treatment duration and increasing adherence to antibiotic use  
17 policy<sup>17</sup>. While the evidence for ASP effectiveness is growing, there is considerable  
18 variation among ASPs in size, activities, and scope. Newly published consensus of an ASP  
19 core elements checklist includes experts from twelve countries on six continents and is  
20 suitable for LMIC<sup>18</sup>.

21  
22  
23 Low and middle income countries face ASP implementation challenges including  
24 limited diagnostic lab capability, inadequate awareness, limited access to quality  
25 antibiotics, and high patient census<sup>19</sup>. To date, few studies have explored the challenges  
26 facilities in India face carrying out ASPs, such as less available manpower and money  
27 dedicated to maintaining a detailed electronic medical record (EMR)<sup>20-22</sup>. We selected  
28 India because, as mentioned, antibiotic resistance rates are high and increasing, and our  
29 study facility had recently implemented an ASP to address this issue. Thus, we undertook a

1  
2  
3 prospective study in Kerala, India to examine the barriers and facilitators to practicing AS  
4  
5 in a LMIC healthcare setting and to identify opportunities to improve AS.  
6

## 7 8 Methods

### 9 10 *Location*

11  
12 In January 2018, we conducted a qualitative study to understand the barriers and  
13  
14 facilitators to AS at a 1300 bed tertiary care private hospital located in the state of Kerala,  
15  
16 India. This hospital, which includes 275 intensive care beds, provides free or subsidized  
17  
18 advanced care for two-thirds of its patient population. The hospital's ASP, which includes  
19  
20 advanced care for two-thirds of its patient population. The hospital's ASP, which includes  
21  
22 clinical pharmacists, physicians, and a medical microbiologist, began in 2016.  
23

### 24 25 *Study population*

26  
27 Physicians, nurses, clinical pharmacists, and a microbiologist were identified using  
28  
29 purposive sampling by the on-site study team. A study team member emailed information  
30  
31 to staff regarding the project and subsequently approached staff in-person to identify  
32  
33 interested participants. We included senior faculty and healthcare professionals working  
34  
35 on the critical care medicine and infectious disease teams for interview. Interviews were  
36  
37 conducted until theoretical saturation. Exclusion criteria included non-English speaking  
38  
39 staff and staff who were subordinates to any member of the study team.  
40  
41

### 42 43 *Data collection*

44  
45 We conducted 31 semi-structured interviews and 4 focus groups with hospital staff  
46  
47 involved in AS. Interview guides were developed based on the Systems Engineering  
48  
49 Initiative for Patient Safety (SEIPS) framework. This framework evaluates the interactions  
50  
51 between the people, organization, tasks, tools/technology, and environment of a given  
52  
53 work system, allowing for identification of key areas for improvement or intervention<sup>23</sup>.  
54  
55  
56  
57  
58  
59  
60

1  
2  
3 Interviews were conducted in private rooms at the hospital, and were audio recorded after  
4  
5 obtaining verbal consent from the participant. No personal information was recorded, and  
6  
7 each interview lasted between 10 and 30 minutes. Interview guides (Appendix A) were  
8  
9 continuously revised to uncover novel information.  
10  
11

### 12 *Analysis*

14 All interviews were transcribed and analyzed deductively using the SEIPS  
15  
16 framework. One member from the study team manually coded the interview transcripts.  
17  
18 Quotations from transcribed interviews were sorted into the SEIPS categories of person,  
19  
20 organization, tasks, tools/technology, and physical environment. After all study team  
21  
22 members agreed on the identified themes from the interviews, the most prominent  
23  
24 barriers and facilitators to AS were identified in each category based on number of  
25  
26 participant responses. We used the SRQR reporting guidelines<sup>24</sup>.  
27  
28  
29  
30

### 31 *Ethics approval*

32  
33 The Institutional Review Board at the University of Wisconsin-Madison granted this  
34  
35 study exemption from full review. The Internal Ethics Committee at the participating  
36  
37 hospital reviewed the study and granted approval.  
38  
39  
40

### 41 *Patient and Public Involvement statement*

42  
43 The development of our study was informed by many patients' preference to get antibiotics  
44  
45 right away, just in case these drugs help. This can influence how healthcare providers deal  
46  
47 with prescribing. We did not involve patients with the design or conduct of the study.  
48  
49 Results will be disseminated to the involved healthcare workers at staff meetings and  
50  
51 electronic communications.  
52  
53  
54  
55  
56  
57  
58  
59  
60



## Results

In total, we interviewed 45 hospital faculty and staff. Participants included individual interviews with physicians (27), clinical pharmacists (3), and one microbiologist. We also conducted four focus groups consisting of ASP team members, pharmacists (two groups), and infection control nurses with two to five participants each.

### *Organization*

The hospital's ASP is the key organizational component of promoting judicious antibiotic use. This team, led by a physician and comprised of physicians, clinical pharmacists, and a medical microbiologist, evaluates the list of inpatients receiving antibiotics to evaluate "The Five R's" of antibiotic prescribing: right drug, right dose, right frequency, right duration, and right indication. When the team identifies opportunities for antibiotic de-escalation or reduced duration, a clinical pharmacist member contacts the prescribing physician to issue treatment recommendations, and the prescribing physician decides whether to modify treatment. This program frequently communicates with staff via email and offers an annual AS symposium. Moreover, according to about half of respondents, hospital administrative leadership champions the ASP. Staff identified this robust program as a key facilitator of AS at the hospital (Table 1, quotes 1-3).

In addition to a highly capable ASP, 17 interviews (48.6%) regarded the microbiology lab as a key facilitator of AS. Staff praised the 24-hour lab's promptness and the rapidity with which lab staff uploaded results into the EMR. In addition, many physicians relied on the microbiologist's expertise for help identifying microorganisms in complicated infections (Table 1, quotes 4 and 5).

1  
2  
3 Despite having an effective stewardship program and lab, 16 interviews (45.7%)  
4 identified limited clinical pharmacist availability as a barrier to AS. Many physicians  
5 recognized clinical pharmacists' knowledge as a critical component of patient care.  
6  
7 However, several departments had one clinical pharmacist and many had none at all. Staff  
8 worried this lack of pharmacist access may cause clinicians to miss drug interactions or  
9 prescribe antibiotics at incorrect dosages (Table 1, quotes 6-8).

### 17 *Person*

19 A majority of participants (57.1%) displayed knowledge of AS concepts, policies,  
20 and practices during our interviews. Staff identified AS activities, such as using the correct  
21 antibiotic at the correct dose, as a key component of reducing antibiotic resistance. In  
22 addition, staff mentioned they often heard about AS at work. This high level of awareness  
23 among staff facilitates AS practices (Table 1, quotes 9-11).

31 While most interviewed staff demonstrated AS policy understanding, they revealed  
32 many physicians resisted accepting suggestions from the ASP. Moreover, several physicians  
33 and pharmacists worried other physicians did not acknowledge pharmacists' contributions  
34 to patient care. According to nine interviews (25.7%), this immunity to change may impede  
35 AS practices and contribute to antibiotic resistance through incorrect antibiotic dosing and  
36 duration (Table 1, quotes 12 and 13).

### 45 *Tasks*

47 Staff in 12 interviews (34.3%) felt that clinicians follow established guidelines when  
48 prescribing antibiotics when the cause of illness is not yet known. Following a clinical  
49 evaluation, the physician orders a culture and initiates a broad-spectrum antibiotic.  
50 Physicians then use this culture result to modify the original antibiotic used. This process,  
51  
52  
53  
54  
55  
56  
57  
58  
59

1  
2  
3 often called de-escalation, involves selecting an antibiotic which has a more specific  
4 spectrum or stopping antibiotic treatment if the cultures do not identify a bacterial  
5 infection (Table 1, quote 14).  
6  
7  
8  
9

10 As a tertiary care facility, this hospital frequently treats high-risk patients who have  
11 acquired resistant infections in the community or at other hospitals. Therefore, physicians  
12 at our study institution often feel compelled to empirically prescribe broad-spectrum  
13 antibiotics while awaiting culture results. However, physicians often forget or refuse to de-  
14 escalate antibiotic use due to workload or fear of losing the patient. In our study, physicians  
15 and pharmacists in eight interviews (22.9%) worried this lack of de-escalation may  
16 increase the risk of antibiotic resistant infections (Table 1, quote 15) and cited de-  
17 escalation as the most important issue regarding antibiotic prescribing. Similarly, in nine  
18 interviews (25.7%), staff members feared their high workloads may negatively impact  
19 their ability to always judiciously prescribe antibiotics. Physicians noted they are often  
20 unable to spend sufficient time evaluating a patient or recall pre-admission drugs, thus  
21 leading to antibiotic over-prescription (Table 1, quotes 16 and 17).  
22  
23  
24  
25  
26  
27  
28  
29  
30  
31  
32  
33  
34  
35  
36  
37

### 38 *Tools/Technology*

39

40 The hospital microbiologist and clinical pharmacists update the hospital  
41 antibiogram annually. The antibiogram, which gives the percent of pathogens susceptible  
42 to various antimicrobial agents, is accessible on the hospital intranet and divided into Gram  
43 positive, Gram negative, and yeast. In 17 interviews (48.6%), staff members identified this  
44 user-friendly tool as a key facilitator in selecting antibiotics based on hospital resistance  
45 patterns, a critical component of AS (Table 1, quote 18).  
46  
47  
48  
49  
50  
51  
52  
53  
54  
55  
56  
57  
58  
59  
60

1  
2  
3 In addition to the antibiogram, this hospital also utilizes an EMR to store  
4 information on inpatients, a useful addition for identifying immediate drug interactions  
5 and thereby reducing harm. However, the EMR does not contain a patient's full scope of  
6 antibiotic use, including antibiotic history, duration, and dose. This incompleteness often  
7 forces physicians and pharmacists to refer to a patient's paper health record, which one  
8 pharmacist described as a "tedious" process. Moreover, physician workflow does not  
9 include entering antibiotic data into the EMR. Due to high work volume, physicians depend  
10 on the ward secretary, nursing assistants, or research assistants to update the EMR. In 12  
11 interviews (34.3%), staff members identified this inability to quickly access the full scope  
12 of a patient's antibiotic history as a barrier to judiciously prescribing antibiotics (Table 1,  
13 quotes 19 and 20).

### 28 *Environment*

29  
30  
31 Despite having a highly engaged AS team, staff mentioned the hospital did not have  
32 signs or posters to increase stewardship awareness, which several staff identified as a  
33 potentially useful addition. A few interviewees thought AS policies were sometimes printed  
34 and posted but did not "stand out." These printed antibiotic prescribing protocols were not  
35 visible to all staff, and in 23 interviews (65.7%) staff members mentioned this limited  
36 visibility may inhibit widespread AS awareness. (Table 1, quotes 21 and 22)

37  
38  
39 In addition, staff identified high local antibiotic use as a barrier to stewardship. As  
40 patients can purchase antibiotics over the counter or have been recently hospitalized at  
41 another facility, many patients enter the hospital already using antibiotics. These high use  
42 rates often lead to antibiotic resistant infections in the community, forcing physicians to  
43 prescribe broad-spectrum antibiotics. Furthermore, several staff feared the impact of high  
44  
45  
46  
47  
48  
49  
50  
51  
52  
53  
54  
55  
56  
57  
58  
59  
60

1  
2  
3 antibiotic use in animal husbandry and fisheries on spreading resistance. In 7 interviews  
4  
5 (20%), staff members wished for enhanced antibiotic prescribing regulations and more AS  
6  
7 awareness in greater India (Table 1, quote 23).  
8  
9

## 10 **Discussion**

11  
12 Our study is the first of its kind to systematically examine key barriers and  
13  
14 facilitators of implementing ASP in a LMIC tertiary hospital. Using the SEIPS model, we  
15  
16 examined the implementation of an ASP at a large tertiary care hospital in order to identify  
17  
18 opportunities to improve this program.  
19  
20

21  
22 We found that limited access to clinical pharmacists, physician immunity to change  
23  
24 resulting in infrequent antibiotic de-escalation, high physician workload, an inadequate  
25  
26 EMR, inadequate physical visibility of stewardship activities, and high antibiotic use in the  
27  
28 community were major barriers to effective ASP implementation. The presence of a  
29  
30 proactive ASP with committed leadership, highly capable and prompt microbiology  
31  
32 laboratory, high level of understanding of AS among staff, easily accessible antibiogram,  
33  
34 and established guidelines for empiric prescribing were identified as important facilitators  
35  
36 of an effective ASP in this hospital.  
37  
38  
39

40  
41 Our study found limited access to pharmacists was a barrier for an effective ASP.  
42  
43 Multidisciplinary rounds with guideline-based antibiotic recommendations for specific  
44  
45 infections have been found to decrease use and duration of both broad spectrum and high-  
46  
47 end, reserve antibiotics<sup>25</sup>. Clinical pharmacists can provide real-time decision support  
48  
49 which could significantly improve rates of antibiotic tailoring to culture data<sup>26</sup>.  
50  
51 Empowering clinical pharmacists to identify highly misused antibiotics, design guideline-  
52  
53  
54  
55  
56  
57  
58  
59  
60

1  
2  
3 based de-escalation protocols, and participate in multidisciplinary rounds may improve the  
4  
5 quality of ASP.  
6  
7

8 Physician resistance to changes in antibiotic use practices was identified as a barrier  
9  
10 to an effective ASP. Factors which influence physician antibiotic prescribing habits include  
11  
12 anxiety about missing an infection and the antibiotic prescribing behavior of peers<sup>27</sup>. This  
13  
14 is an important active area of research; interventions such as encouraging reflection on  
15  
16 practice, the use of audit and feedback, small-group learning with discussions and  
17  
18 engagement by senior clinicians, and deploying multidisciplinary teams including clinical  
19  
20 pharmacists have been shown to improve prescriber behavior<sup>28,29</sup>. In LMIC settings, we  
21  
22 recommend leadership should actively promote ASP activities and their value. Feedback on  
23  
24 antibiotic usage and patterns should be disseminated to improve adherence to local or  
25  
26 national guidelines at this facility.  
27  
28  
29  
30

31 We found that the usability and accessibility of the EMR were another barrier to an  
32  
33 effective ASP. Adoption of an EMR can improve ASP by providing microbiology results,  
34  
35 radiology studies, and clinical data<sup>30</sup>. These factors allow ASPs the opportunity to further  
36  
37 curtail antibiotic use; our data here support these findings. However, the expense of  
38  
39 acquiring and optimizing an EMR system to harness its full potential makes this  
40  
41 intervention difficult to implement, particularly in LMIC settings<sup>31</sup>.  
42  
43  
44

45 Our study identified high and indiscriminate community-based antibiotic use as a  
46  
47 barrier to practicing AS at our study site. Variably-enforced regulations on antibiotic  
48  
49 dispensing and the availability of antibiotics without a prescription is a widespread  
50  
51 problem in many countries, including India<sup>32</sup>. The broad and unregulated use of antibiotics  
52  
53 in animal feed and fisheries compounds this barrier<sup>33</sup>. ASP in healthcare settings can be  
54  
55  
56  
57  
58  
59  
60

1  
2  
3 complemented by AS in the community for all uses of antibiotics, with an inclusive “One  
4  
5 Health” approach to addressing resistance<sup>34</sup>.  
6

7  
8 Our study has limitations. First, this was a single center study. Thus, transferability  
9  
10 of our findings to more resource-limited rural hospitals within India or to other LMIC may  
11  
12 not be possible. Second, we did not conduct direct observations of practice to correlate  
13  
14 with self-reporting. Future studies may identify additional barriers and facilitators by  
15  
16 implementing direct observation approaches to collect data on stewardship practices.  
17  
18  
19  
20  
21

## 22 Conclusion

23  
24 The use of the SEIPS model to analyze an ASP in an LMIC identified barriers and  
25  
26 facilitators within the healthcare work system. Opportunities for improvement at this  
27  
28 institution include increasing accessibility to clinical pharmacists, implementing strategies  
29  
30 to overcome physician immunity to change, and establishing a more accessible and  
31  
32 complete EMR. Interventions which account for and address barriers and strengthen  
33  
34 facilitators should be tested in future studies for their effect on antimicrobial usage and  
35  
36 resistance.  
37  
38  
39  
40  
41  
42

## 43 Author Statement

44  
45 KB created the interview guides, conducted in-person interviews, and wrote, edited, and  
46  
47 prepared the manuscript. CS created the interview guides, conducted in-person interviews,  
48  
49 and wrote/edited the manuscript. JK edited the manuscript. LK conducted on-site data  
50  
51 collection and wrote/edited the manuscript. MVJ assisted with on-site data collection and  
52  
53 edited the manuscript. SS devised the project and edited the manuscript. NS obtained  
54  
55  
56  
57  
58  
59  
60

1  
2  
3 funding, devised the project, and edited the manuscript. AS assisted with the grant and  
4  
5 edited the manuscript. DS assisted with the grant and wrote/edited the manuscript.  
6  
7  
8

## 9 10 11 12 13 14 15 16 17 18 19 20 21 22 23 24 25 26 27 28 29 30 31 32 33 34 35 36 37 38 39 40 41 42 43 44 45 46 47 48 49 50 51 52 53 54 55 56 57 58 59 60

### References

1. United Nations (2016). Political Declaration of the high-level meeting of the General Assembly on antimicrobial resistance. *Bulletin of the General Assembly, Seventy-First Session: Global health and foreign policy*. Available at: [https://digitallibrary.un.org/record/842813/files/A\\_71\\_L-2-EN.pdf](https://digitallibrary.un.org/record/842813/files/A_71_L-2-EN.pdf)
2. Organisation for Economic Co-operation and Development (2016). Antimicrobial resistance: policy insights. Available at: <https://www.oecd.org/health/health-systems/AMR-Policy-Insights-November2016.pdf>
3. Centers for Disease Control (2018). About Antimicrobial Resistance. Available at: <https://www.cdc.gov/drugresistance/about.html>
4. Jairam, N., & Lakhe M. (2014) The urgent need for infection control programmes in Indian health care. *World hospitals and health services: the official journal of the International Hospital Federation*. 2014;50(2):31-34.
5. Ayukekbong J, Ntemgwa M, Atabe A. (2017). The threat of antimicrobial resistance in developing countries: causes and control strategies. *Antimicrobial Resistance and Infection Control*. 6:47.
6. Kumar, S. G., Adithan, C., Harish, B. N., Sujatha, S., Roy, G., & Malini, A. (2013). Antimicrobial resistance in India: A review. *Journal of Natural Science, Biology, and Medicine*, 4(2), 286–291. <http://doi.org/10.4103/0976-9668.116970>
7. Bammigatti, C., Doradla, S., Belgode, H. N., Kumar, H., & Swaminathan, R. P. (2017). Healthcare Associated Infections in a Resource Limited Setting. *Journal of Clinical and Diagnostic Research : JCDR*, 11(1), OC01–OC04. <http://doi.org/10.7860/JCDR/2017/23076.9150>
8. Barker, A. K., Brown, K., Ahsan, M., Sengupta, S., & Safdar, N. (2017). Social determinants of antibiotic misuse: a qualitative study of community members in Haryana, India. *BMC Public Health*, 17, 333. <http://doi.org/10.1186/s12889-017-4261-4>
9. Barker, A. K., Brown, K., Ahsan, M., Sengupta, S., & Safdar, N. (2017). What drives inappropriate antibiotic dispensing? A mixed-methods study of pharmacy employee perspectives in Haryana, India. *BMJ Open*, 7(3), e013190. <http://doi.org/10.1136/bmjopen-2016-013190>



- 1  
2  
3  
4  
5  
6  
7  
8  
9  
10  
11  
12  
13  
14  
15  
16  
17  
18  
19  
20  
21  
22  
23  
24  
25  
26  
27  
28  
29  
30  
31  
32  
33  
34  
35  
36  
37  
38  
39  
40  
41  
42  
43  
44  
45  
46  
47  
48  
49  
50  
51  
52  
53  
54  
55  
56  
57  
58  
59
10. Gandra, S., Mojica, N., Klein, E. Y., Ashok, A., Nerurkar, V., Kumari, M., Ramesh, U., Sunanda, D., Vadwai, V., Das, B., Laxminarayan, R. (2016). Trends in antibiotic resistance among major bacterial pathogens isolated from blood cultures tested at a large private laboratory network in India, 2008–2014. *International Journal of Infectious Diseases*, 50, 75–82. <http://doi.org/10.1016/j.ijid.2016.08.002>
  11. Khety, Z., Mohanta, G., Jain, S., Dawoodi, S. (2017). Changing Antimicrobial Resistance Pattern of Isolates from an ICU Over a 3 Year period. *Journal of the Association of Physicians of India*. 65: 13-16. Available at: [japi.org/february\\_2017/02\\_oa\\_changing\\_antimicrobial\\_resistance\\_pattern.pdf](http://japi.org/february_2017/02_oa_changing_antimicrobial_resistance_pattern.pdf)
  12. Moolchandani, K., Sastry, A. S., Deepashree, R., Sistla, S., Harish, B., & Mandal, J. (2017). Antimicrobial Resistance Surveillance among Intensive Care Units of a Tertiary Care Hospital in Southern India. *Journal of Clinical and Diagnostic Research : JCDR*, 11(2), DC01–DC07. <http://doi.org/10.7860/JCDR/2017/23717.9247>
  13. Odsbu, I., Khedkar, S., Lind, F., Khedkar, U., Nerkar, S. S., Orsini, N., Tamhankar, A.J., Stålsby Lundborg, C. (2018). Trends in Resistance to Extended-Spectrum Cephalosporins and Carbapenems among *Escherichia coli* and *Klebsiella* spp. Isolates in a District in Western India during 2004–2014. *International Journal of Environmental Research and Public Health*, 15(1), 155. <http://doi.org/10.3390/ijerph15010155>
  14. Satyanarayana, S., Kwan, A., Daniels, B., Subbaraman, R., McDowell, A., Bergkvist, S., Das, R.K., Das, V., Das, J., Pai, M. (2016). Use of standardised patients to assess antibiotic dispensing for tuberculosis by pharmacies in urban India: a cross-sectional study, *The Lancet Infectious Diseases*, 16(11): 1261-1268. [https://doi.org/10.1016/S1473-3099\(16\)30215-8](https://doi.org/10.1016/S1473-3099(16)30215-8)
  15. Sharma, M., Damlin, A., Pathak, A., Stålsby Lundborg, C. (2015). Antibiotic Prescribing among Pediatric Inpatients with Potential Infections in Two Private Sector Hospitals in Central India. *PLOS ONE* 10(11): e0142317. <https://doi.org/10.1371/journal.pone.0142317>
  16. Infectious Diseases Society of America (2018). Promoting Antimicrobial Stewardship in Human Medicine. Available at: [http://www.idsociety.org/Stewardship\\_Policy/](http://www.idsociety.org/Stewardship_Policy/)
  17. Davey, P., Marwick ,C., Scott, C.L., Charani, E., McNeil, K., Brown, E., Gould, I.M., Ramsay, C.R., Michie, S. (2017) Interventions to improve antibiotic prescribing practices for hospital inpatients. *Cochrane Database Syst Rev*. 2017 Feb 9 (2). Doi: 10.1002/14651858.CD003543.pub4
  18. Pulcini, C., Binda, F., Lamkang, A.S., Trett, A., Charani, E., Goff, D.A., Harbarth, S., Hinrichsen, S.L., Levy-Hara, G., Mendelson, M., Nathwani, D., Gunturu, R., Singh, S., Srinivasan, A., Thamlikitkul, V., Thursky, K., Vlieghe, E., Wertheim, H., Zeng, M.,

- 1  
2  
3 Gandra, S., Laxminarayan, R. (2018). Developing core elements and checklist items  
4 for global hospital antimicrobial stewardship programmes: a consensus approach,  
5 *Clinical Microbiology and Infection* doi: 10.1016/j.cmi.2018.03.033.  
6  
7  
8 19. Cox J.A., Vlieghe E., Mendelson M., Wertheim H., Ndegwa L., Villegas M.V., Gould I.,  
9 Levy Hara G. (2017) Antibiotic stewardship in low-and middle-income countries:  
10 'same, but different'?, *Clinical Microbiology and Infection*. doi:  
11 10.1016/j.cmi.2017.07.010  
12  
13  
14 20. Shah, N., Joshi, A., & Ganguly, B. (2017) Impact of Antibiotic Stewardship Program on  
15 Prescribing Pattern of Antimicrobials in Patients of Medical Intensive Care Unit. *J*  
16 *Clin. Diagn Res.* July 2017 11(7): 11-15 doi: [10.7860/JCDR/2017/27171.10237](https://doi.org/10.7860/JCDR/2017/27171.10237)  
17  
18 21. Shafiq, N., Praveen Kumar, M., Gautam, V. et al. (2016). Antibiotic stewardship in a  
19 tertiary care hospital of a developing country: establishment of a system and its  
20 application in a unit--GASP Initiative. *Infection* 44(5): 651-659.  
21 <https://doi.org/10.1007/s15010-016-0913-z>  
22  
23  
24 22. Ravi, N., Laha, A., Hmar, L., Chatterjee, S., Goswami, J., Goel, G., Dhar, K., Ghosh, T.,  
25 Chatterjee, S., Datta, S.S., Bhattacharya, S. (2017). Exploring the prescribing  
26 behaviours and the mind of antibiotic prescribers is critical for a successful  
27 antibiotic stewardship program: Results of a survey from Eastern India. *Indian*  
28 *Journal of Medical Microbiology*, 35(2): 299-301. Doi: 10.4103/ijmm.IJMM\_17\_133.  
29  
30  
31 23. Carayon, P., Schoofs Hundt, A., Karsh, B., Gurses, A., Alvarado, C., Smith, M., Flatley  
32 Brennan P. (2006). Work system design for patient safety: the SEIPS model. *BMJ*  
33 *Quality & Safety* 2006; 15: 50-58. <http://dx.doi.org/10.1136/qshc.2005.015842>  
34  
35  
36 24. O'Brien BC, Harris IB, Beckman TJ, Reed DA, Cook DA. Standards for reporting  
37 qualitative research: a synthesis of recommendations. *Acad Med.* 2014;89(9):1245-  
38 1251.  
39  
40  
41 25. Rimawi, R.H., Mazer, M.A., Siraj, D.S., Gooch, M., Cook, P.P. (2013). "Impact of Regular  
42 Collaboration between Infectious Diseases and Critical Care Practitioners on  
43 Antimicrobial Utilization and Patient Outcome." *Crit Care Med.* 2013  
44 Sep;41(9):2099-107.  
45  
46 26. Oxman, D.A., Adams, C.D. Deluke, G., et al. (2015). Improving Antibiotic De-  
47 Escalation in Suspected Ventilator-Associated Pneumonia: An Observational Study  
48 With a Pharmacist-Driven Intervention. *Journal of Pharmacy Practice* . Vol 28, Issue  
49 5, pp. 457 - 461. doi: 10.1177/0897190014527316  
50  
51 27. Stålsby Lundborg C., Tamhankar A.J. (2014). Understanding and changing human  
52 behaviour—antibiotic mainstreaming as an approach to facilitate modification of  
53 provider and consumer behaviour. *Upsala Journal of Medical Sciences.*  
54 2014;119(2):125-133. doi:10.3109/03009734.2014.905664.  
55  
56  
57  
58  
59

- 1  
2  
3 28. Charani, E; Edwards, R; Sevdalis, N; et al. Behavior Change Strategies to Influence  
4 Antimicrobial Prescribing in Acute Care: A Systematic Review, *Clinical Infectious*  
5 *Diseases*, Volume 53, Issue 7, 1 October 2011, Pages 651–662.  
6  
7 29. Livorsi, D., Comer, A., Matthias, M., Perencevich, E., Bair, M. (2015). Factors  
8 influencing antibiotic-prescribing decisions among inpatient physicians: a  
9 qualitative investigation. *Infection control and hospital epidemiology*.  
10 2015;36(9):1065-1072. doi:10.1017/ice.2015.136.  
11  
12 30. Jawhari, B., Keenan, L., Zakus, D., et al. (2016). Barriers and facilitators to Electronic  
13 Medical Record (EMR) use in an urban slum. *International Journal of Medical*  
14 *Informatics*. Volume 94, October 2016, Pages 246-254.  
15  
16 31. Forrest, G; Van Schooneveld, T; Kullar, R; et al. (2014). Use of Electronic Health  
17 Records and Clinical Decision Support Systems for Antimicrobial Stewardship,  
18 *Clinical Infectious Diseases*, Volume 59, Issue 3, Pages S122–S133.  
19  
20 32. Shet A, Sundaresan S, Forsberg BC. Pharmacy-based dispensing of antimicrobial  
21 agents without prescription in India: appropriateness and cost burden in the private  
22 sector. *Antimicrobial Resistance and Infection Control*. 2015;4:55.  
23 doi:10.1186/s13756-015-0098-8.  
24  
25 33. Chang Q, Wang W, Regev-Yochay G, Lipsitch M, Hanage WP. Antibiotics in  
26 agriculture and the risk to human health: how worried should we be? *Evolutionary*  
27 *Applications*. 2015;8(3):240-247. doi:10.1111/eva.12185.  
28  
29 34. Centers for Disease Control (2017). One Health Basics. Available at:  
30 <https://www.cdc.gov/onehealth/basics/index.html>  
31  
32 35. Carayon, P., Schoofs Hundt, A., Karsh, B., Gurses, A., Alvarado, C., Smith, M., Flatley  
33 Brennan P. (2006). Work system design for patient safety: the SEIPS model. *BMJ*  
34 *Quality & Safety* 2006; 15: 50-58. <http://dx.doi.org/10.1136/qshc.2005.015842>  
35  
36  
37  
38  
39  
40  
41  
42  
43  
44  
45  
46  
47  
48  
49  
50  
51  
52  
53  
54  
55  
56  
57  
58  
59  
60

**Table 1.** Themes identified from SEIPS components with corresponding representative quotations

| Theme                                    | Representative Quote                                                                                                                                                                                                                                                                                                                                               |
|------------------------------------------|--------------------------------------------------------------------------------------------------------------------------------------------------------------------------------------------------------------------------------------------------------------------------------------------------------------------------------------------------------------------|
| <b>Organization</b>                      |                                                                                                                                                                                                                                                                                                                                                                    |
| <i>Antimicrobial Stewardship Program</i> | 1. "We audit to make sure the right indication is happening. We check to see the dosage is correct and monitor what's happening here to track our prescriptions." (pharmacist)                                                                                                                                                                                     |
|                                          | 2. "Every year we do something with the antibiotic prescription program. Along with infection control. Usually a three-day program for doctors and one day is dedicated to antibiotic stewardship. Speakers from all over the country [come] and we take about 30-35 doctors a year and try to teach them about antibiotic stewardship." (infection control nurse) |
|                                          | 3. "The medical superintendent is a part of our team. I don't think you can get much higher up than that. The management is very supportive." (pharmacist)                                                                                                                                                                                                         |
| <i>Microbiology laboratory</i>           | 4. "Our microbiology lab is one of the best in the country. They are very reliable and help us immensely." (physician)                                                                                                                                                                                                                                             |
|                                          | 5. "Whenever the lab grows something in the culture, could be six hours, ten hours, we are called and told. So that does impact our management. If we are thinking about a gram positive illness and we get a culture that's gram negative, which is grown very quickly, we totally change our report. We are informed pretty quickly." (physician)                |

|                                                                                                                                                                                                                                                                                                                                    |                                                                                                                                                                                                                                                                                                                                                          |
|------------------------------------------------------------------------------------------------------------------------------------------------------------------------------------------------------------------------------------------------------------------------------------------------------------------------------------|----------------------------------------------------------------------------------------------------------------------------------------------------------------------------------------------------------------------------------------------------------------------------------------------------------------------------------------------------------|
| <p>1<br/>2<br/>3<br/>4<br/>5<br/>6<br/>7<br/>8<br/>9<br/>10<br/>11<br/>12<br/>13<br/>14<br/>15<br/>16<br/>17<br/>18<br/>19<br/>20<br/>21</p> <p><i>Clinical pharmacist availability</i></p>                                                                                                                                        | <p>6. “[Pharmacists are] not routinely in the ICU. I wish more pharmacists would tell physicians their doses or their drug interactions are wrong, but I don’t see them in the cardiac or pediatric ICU.” (physician)</p>                                                                                                                                |
|                                                                                                                                                                                                                                                                                                                                    | <p>7. “We have one pharmacist in our ICU, she visits. The problem with her is she’s overworked. She’s alone. She comes on the rounds only sometimes and comes around and checks the antibiotics dosing is correct. But duration and all others are decided by physicians. If there were more of them it would be much better.” (physician)</p>           |
|                                                                                                                                                                                                                                                                                                                                    | <p>8. “If a clinician is working alone, we may not have much concern about things that pharmacists are more aware of, like drug interactions. Routine medications may have interactions also, so pharmacists’ help is needed. That type of information is more with the pharmacists, not the clinicians. They are not always available.” (physician)</p> |
| <p><b>Person</b></p>                                                                                                                                                                                                                                                                                                               |                                                                                                                                                                                                                                                                                                                                                          |
| <p>22<br/>23<br/>24<br/>25<br/>26<br/>27<br/>28<br/>29<br/>30<br/>31<br/>32<br/>33<br/>34<br/>35<br/>36<br/>37<br/>38<br/>39<br/>40<br/>41<br/>42<br/>43<br/>44<br/>45<br/>46<br/>47<br/>48<br/>49<br/>50<br/>51<br/>52<br/>53<br/>54<br/>55<br/>56<br/>57<br/>58<br/>59<br/>60</p> <p><i>Antibiotic stewardship knowledge</i></p> | <p>9. “Antibiotic stewardship is a standardized practice with the right treatment at the right time.” (physician)</p>                                                                                                                                                                                                                                    |
|                                                                                                                                                                                                                                                                                                                                    | <p>10. “To me antibiotic stewardship is to start judicious antibiotics...I won’t say to start low antibiotics, I say to start optimum antibiotics.” (physician)</p>                                                                                                                                                                                      |
|                                                                                                                                                                                                                                                                                                                                    | <p>11. “Most of us here are aware of these ideas. For us, it’s about everything that has to do with a prescription. The ultimate aim is judicious use of antibiotics. We need to use the right antibiotics, the right dose.” (physician)</p>                                                                                                             |

|                                                                                                                                                                                 |                                                                                                                                                                                                                                                                                                                                                                                   |
|---------------------------------------------------------------------------------------------------------------------------------------------------------------------------------|-----------------------------------------------------------------------------------------------------------------------------------------------------------------------------------------------------------------------------------------------------------------------------------------------------------------------------------------------------------------------------------|
| <p>1<br/>2<br/>3<br/>4<br/>5<br/>6<br/>7<br/>8<br/>9<br/>10<br/>11<br/>12<br/>13<br/>14<br/>15<br/>16</p> <p><i>Physician resistance to antibiotic stewardship policies</i></p> | <p>12. "I think clinicians are empowered to think that they know best. They need to recognize the roles of the microbiologists and the pharmacists and should not feel low that they have asked for help."<br/>(physician)</p>                                                                                                                                                    |
|                                                                                                                                                                                 | <p>13. "Challenges come from navigating human behavior. Sometimes you'll recommend things but people just won't listen to you." (infection control nurse)</p>                                                                                                                                                                                                                     |
| <p>17<br/>18<br/>19</p> <p><b>Tasks</b></p>                                                                                                                                     |                                                                                                                                                                                                                                                                                                                                                                                   |
| <p>20<br/>21<br/>22<br/>23<br/>24<br/>25<br/>26<br/>27<br/>28</p> <p><i>Antibiotic prescribing</i></p>                                                                          | <p>14. "We have a high patient load and socioeconomic status is a big deal. Poverty and malnourished children are a reality. We can't wait for cultures. We have protocols to start them on antibiotics according to which ones have been most successful here."<br/>(physician)</p>                                                                                              |
|                                                                                                                                                                                 | <p>15. "I think it's a problem all over India, because the first antibiotics they prescribe is the carbapenems. And once they prescribe it is never de-escalated or rarely de-escalated. Basically they go, 'let's continue. What the culture says? I don't want to do that. Let's just continue because he's improving.' So it's a major, major, major problem." (physician)</p> |
| <p>41<br/>42<br/>43<br/>44<br/>45<br/>46<br/>47<br/>48<br/>49<br/>50<br/>51<br/>52<br/>53<br/>54<br/>55<br/>56<br/>57<br/>58<br/>59<br/>60</p> <p><i>Workload</i></p>           | <p>16. "Sometimes we are busy and we forget pre admission drugs which are missed because we are more worried about the current problems and there are so many the patient is already on that we need to continue." (physician)</p>                                                                                                                                                |
|                                                                                                                                                                                 | <p>17. "Our work here does affect how long you can spend on individual cases." (infection control nurse)</p>                                                                                                                                                                                                                                                                      |

| <b>Tools and Technology</b>                                        |                                                                                                                                                                                                                                                                                                                                                                                                                                               |
|--------------------------------------------------------------------|-----------------------------------------------------------------------------------------------------------------------------------------------------------------------------------------------------------------------------------------------------------------------------------------------------------------------------------------------------------------------------------------------------------------------------------------------|
| <i>Antibiogram</i>                                                 | 18. "It is an annual antibiogram. We divide it into gram positive, gram negative, and yeast. We also have a blood gram positive from blood isolates, negative, and yeast. They are separate. We follow international guidelines so for any isolate that is more than 30, we take them and follow the rules. Every year it is updated. This year they are trying to involve more pharmacists" (infection control nurse)                        |
| <i>Electronic medical record</i>                                   | 19. "If I look today at the record, I can only see what they took today. The current medications only. Not what they got yesterday. I can't trace the meropenem. To see all the drugs we have to go to the paper medical record room. It's a very tedious process. We don't know the dose or duration or all the drugs...if the patient returns in a few weeks, we don't know what they were taking and what will be effective." (pharmacist) |
|                                                                    | 20. "I see 80 patients a day. So it's not possible for me to spend so much time logging in, recording all this. I don't think it's possible unless I had someone sitting next to me doing just that." (physician)                                                                                                                                                                                                                             |
| <b>Environment</b>                                                 |                                                                                                                                                                                                                                                                                                                                                                                                                                               |
| <i>Posters or signs promoting antibiotic stewardship awareness</i> | 21. "It's only in protocols, which we do print out only for doctors. Nurses don't see that." (physician)                                                                                                                                                                                                                                                                                                                                      |
|                                                                    | 22. "We have some print-outs on our notice board about colistin and other higher-end antibiotics...but we don't have posters. As for the printouts, they aren't that catchy." (physician)                                                                                                                                                                                                                                                     |

1  
2  
3  
4 *High levels of community*  
5 *antibiotic use*  
6  
7  
8  
9  
10  
11  
12  
13  
14

23. "Outside the hospital this is a rampant problem in India. There is much abuse and misuse of antibiotics. Anyone can just go to a roadside pharmacy and describe their symptoms and get antibiotics over the counter just like that. They just go to the guy sitting there and get whatever. I think we should make it much harder to get antibiotics." (physician)

15  
16  
17  
18 Frequently used abbreviations:  
19

20 LMIC: low and middle income countries,  
21

22 ASP: antibiotic stewardship program,  
23

24 AS: antibiotic stewardship,  
25

26 SEIPS: Systems Engineering Initiative for Patient Safety,  
27

28 EMR: electronic medical record  
29  
30  
31  
32  
33  
34  
35  
36  
37  
38  
39  
40  
41  
42  
43  
44  
45  
46  
47  
48  
49  
50  
51  
52  
53  
54  
55  
56  
57  
58  
59  
60



## Appendix A: Antibiotic Stewardship Interview Questions

Interviewer: Antibiotic stewardship refers to the judicious use of antibiotics, and is a critical component of reducing antibiotic resistance. Components of antibiotic stewardship involve drug expertise, evaluating ongoing antibiotic treatment, monitoring prescribing practices, and reporting information on antibiotic use and resistance.

Your responses will be recorded with a voice recorder and transcribed, but the responses will be de-identified in any data set and your identity will be kept confidential.

### *Person*

1. How do you define antibiotic stewardship?
2. What do you think of antibiotic stewardship as an infectious disease prevention strategy?
3. Describe your level of interaction working with infectious disease specialists at your hospital.
4. Physician/Nurse
  - a. Describe your work with pharmacists in your hospital.
    - i. If poor availability/they don't work with pharmacists: What factors limit their availability to you?
    - ii. How do you work with pharmacists on specific patients?
    - iii. In an ideal situation, what would be different about how you work with the pharmacists?
  - b. Tell me about your workload.
    - i. How does your workload impact your ability to complete your job responsibilities?
5. All clinicians: Describe employee turnover on your ward

### *Organization*

1. Describe your experience regarding antimicrobial stewardship education in your facility.
  - a. What is your view of these trainings (how likely are you to attend? Do you apply the information to your practice? Who attends?)?
2. What do you hear about antimicrobial stewardship at work?
3. Describe a time a new policy was implemented on your ward/in your lab.
  - a. What challenges were encountered? What went well? How did this compare to other times when new policies were implemented?
  - b. How were staff involved in the development of the new policy? How are they typically involved in policy development?
4. Tell me about your interactions with people involved in the antibiotic stewardship program.
  - a. What types of things do you collaborate on/communicate about?
  - b. How could your interactions be improved?
5. What is your sense of how hospital leaders/management are involved in antibiotic stewardship efforts in your ward/lab?

6. All clinicians: How could antibiotic prescribing be improved in your facility? Tell me about empiric prescribing at your hospital. What factors should be considered when prescribing an antibiotic if the cause of illness is not yet known?

### *Tasks*

1. Lab Staff
  - a. Describe how you create an antibiogram.
    - i. How does creating an antibiogram fit in with your other job responsibilities?
    - ii. How often do you update the antibiogram?
    - iii. What is the scope of the antibiogram?
2. Nurses
  - a. What antibiotic stewardship practices are you responsible for on your ward?
  - b. How often do you review medications? Describe your review process.
  - c. What do you do when antibiotic usage seems questionable? Do you or your team decide together?
  - d. Are routine audits of antibiotic use conducted on your ward?
3. Pharmacists
  - a. What is your process when an antibiotic is ordered?
    - i. What are your selection review practices? Describe your collaboration with physicians.
    - ii. Describe your antibiogram use, including successes and challenges. How frequently is it updated?
4. Physicians
  - a. Describe your antibiotic selection process, including any guidelines you may use in making your decision.
    - i. Describe your antibiogram use, including successes and challenges. How frequently is it updated?
    - ii. How often are those guidelines adhered to in your workplace? If infrequently, what are the barriers to adherence?
  - b. Describe your review of antibiotic selection, including after the drug has been prescribed and after you have obtained culture results.
5. All clinicians: Where do you store information on antibiotic use (dosage, duration, indication)?
6. All clinicians: How often/how many cases of treatment failure related to resistance have you seen?
7. All staff: Evaluate the effect of your workload on your ability to implement antibiotic stewardship activities.
8. Describe what (if any) antibiotic resistance has had on your practice.
9. Describe what (if any) antibiotic resistance has had on your community.
10. What do you think would be the most useful strategies to help decrease antibiotic use?

### *Tools and Technology*

1. All clinicians: How do you determine a patient's antibiotic use status?

- 1
- 2
- 3 a. What resources or tools do you use to decide which antibiotic is most appropriate
- 4 for a patient?
- 5
- 6 2. Physicians and maybe pharmacists:
- 7 a. How does the lab impact your antibiotic prescribing?
- 8
- 9 3. Lab staff: What changes could be made to your lab that would help you to more
- 10 effectively support antibiotic prescribing/stewardship at your hospital?

### 11 *Environment*

12

13 What posters, signs, or other visual cues promoting good antibiotic prescribing are

14 present in your hospital? Where are they located? Which ones do you notice most?

15

16

17 Final: Is there anything I haven't asked you about antibiotic stewardship that you think is

18 important for me to know?

19

20

21

22

23

24

25

26

27

28

29

30

31

32

33

34

35

36

37

38

39

40

41

42

43

44

45

46

47

48

49

50

51

52

53

54

55

56

57

58

59

60

# Reporting checklist for qualitative study.

Based on the SRQR guidelines.

## Instructions to authors

Complete this checklist by entering the page numbers from your manuscript where readers will find each of the items listed below.

Your article may not currently address all the items on the checklist. Please modify your text to include the missing information. If you are certain that an item does not apply, please write "n/a" and provide a short explanation.

Upload your completed checklist as an extra file when you submit to a journal.

In your methods section, say that you used the SRQR reporting guidelines, and cite them as:

O'Brien BC, Harris IB, Beckman TJ, Reed DA, Cook DA. Standards for reporting qualitative research: a synthesis of recommendations. *Acad Med.* 2014;89(9):1245-1251.

|                                            | Reporting Item                                                                                                                                                                                                                                          | Page Number |
|--------------------------------------------|---------------------------------------------------------------------------------------------------------------------------------------------------------------------------------------------------------------------------------------------------------|-------------|
|                                            | <a href="#">#1</a> Concise description of the nature and topic of the study identifying the study as qualitative or indicating the approach (e.g. ethnography, grounded theory) or data collection methods (e.g. interview, focus group) is recommended | 5           |
|                                            | <a href="#">#2</a> Summary of the key elements of the study using the abstract format of the intended publication; typically includes background, purpose, methods, results and conclusions                                                             | 2           |
| Problem formulation                        | <a href="#">#3</a> Description and significance of the problem / phenomenon studied: review of relevant theory and empirical work; problem statement                                                                                                    | 3           |
| Purpose or research question               | <a href="#">#4</a> Purpose of the study and specific objectives or questions                                                                                                                                                                            | 2           |
| Qualitative approach and research paradigm | <a href="#">#5</a> Qualitative approach (e.g. ethnography, grounded theory, case study, phenomenology, narrative research) and guiding theory if appropriate; identifying the                                                                           | 5           |

research paradigm (e.g. postpositivist, constructivist / interpretivist) is also recommended; rationale. The rationale should briefly discuss the justification for choosing that theory, approach, method or technique rather than other options available; the assumptions and limitations implicit in those choices and how those choices influence study conclusions and transferability. As appropriate the rationale for several items might be discussed together.

|                                                                                                          |                                             |                                                                                                                                                                                                                                                                                                                                                                         |                                                                                                                                    |
|----------------------------------------------------------------------------------------------------------|---------------------------------------------|-------------------------------------------------------------------------------------------------------------------------------------------------------------------------------------------------------------------------------------------------------------------------------------------------------------------------------------------------------------------------|------------------------------------------------------------------------------------------------------------------------------------|
| 1<br>2<br>3<br>4<br>5<br>6<br>7<br>8<br>9<br>10<br>11<br>12<br>13                                        |                                             |                                                                                                                                                                                                                                                                                                                                                                         |                                                                                                                                    |
| 14<br>15<br>16<br>17<br>18<br>19<br>20<br>21<br>22<br>23<br>24<br>25<br>26<br>27<br>28<br>29<br>30<br>31 | Researcher characteristics and reflexivity  | <a href="#">#6</a> Researchers' characteristics that may influence the research, including personal attributes, qualifications / experience, relationship with participants, assumptions and / or presuppositions; potential or actual interaction between researchers' characteristics and the research questions, approach, methods, results and / or transferability | n/a. The team did not feel any characteristics dramatically influenced our devising of the interview guide or the data collection. |
| 32<br>33                                                                                                 | Context                                     | <a href="#">#7</a> Setting / site and salient contextual factors; rationale                                                                                                                                                                                                                                                                                             | 4                                                                                                                                  |
| 34<br>35<br>36<br>37<br>38<br>39<br>40                                                                   | Sampling strategy                           | <a href="#">#8</a> How and why research participants, documents, or events were selected; criteria for deciding when no further sampling was necessary (e.g. sampling saturation); rationale                                                                                                                                                                            | 5                                                                                                                                  |
| 41<br>42<br>43<br>44<br>45<br>46                                                                         | Ethical issues pertaining to human subjects | <a href="#">#9</a> Documentation of approval by an appropriate ethics review board and participant consent, or explanation for lack thereof; other confidentiality and data security issues                                                                                                                                                                             | 6                                                                                                                                  |
| 47<br>48<br>49<br>50<br>51<br>52<br>53<br>54<br>55<br>56                                                 | Data collection methods                     | <a href="#">#10</a> Types of data collected; details of data collection procedures including (as appropriate) start and stop dates of data collection and analysis, iterative process, triangulation of sources / methods, and modification of procedures in response to evolving study findings; rationale                                                             | 5                                                                                                                                  |
| 57<br>58<br>59<br>60                                                                                     | Data collection                             | <a href="#">#11</a> Description of instruments (e.g. interview guides,                                                                                                                                                                                                                                                                                                  | Appendix 1                                                                                                                         |

|                                                          |                                                                                              |                                                                                                                                                                                                                                                                                                                              |       |
|----------------------------------------------------------|----------------------------------------------------------------------------------------------|------------------------------------------------------------------------------------------------------------------------------------------------------------------------------------------------------------------------------------------------------------------------------------------------------------------------------|-------|
| 1<br>2<br>3<br>4                                         | instruments and technologies                                                                 | questionnaires) and devices (e.g. audio recorders) used for data collection; if / how the instruments(s) changed over the course of the study                                                                                                                                                                                |       |
| 5<br>6<br>7<br>8<br>9                                    | Units of study                                                                               | <a href="#">#12</a> Number and relevant characteristics of participants, documents, or events included in the study; level of participation (could be reported in results)                                                                                                                                                   | 5     |
| 10<br>11<br>12<br>13<br>14<br>15<br>16<br>17<br>18       | Data processing                                                                              | <a href="#">#13</a> Methods for processing data prior to and during analysis, including transcription, data entry, data management and security, verification of data integrity, data coding, and anonymisation / deidentification of excerpts                                                                               | 6     |
| 19<br>20<br>21<br>22<br>23<br>24<br>25                   | Data analysis                                                                                | <a href="#">#14</a> Process by which inferences, themes, etc. were identified and developed, including the researchers involved in data analysis; usually references a specific paradigm or approach; rationale                                                                                                              | 6     |
| 26<br>27<br>28<br>29<br>30                               | Techniques to enhance trustworthiness                                                        | <a href="#">#15</a> Techniques to enhance trustworthiness and credibility of data analysis (e.g. member checking, audit trail, triangulation); rationale                                                                                                                                                                     | 6     |
| 31<br>32<br>33<br>34<br>35                               | Syntheses and interpretation                                                                 | <a href="#">#16</a> Main findings (e.g. interpretations, inferences, and themes); might include development of a theory or model, or integration with prior research or theory                                                                                                                                               | 6     |
| 36<br>37<br>38<br>39                                     | Links to empirical data                                                                      | <a href="#">#17</a> Evidence (e.g. quotes, field notes, text excerpts, photographs) to substantiate analytic findings                                                                                                                                                                                                        | 18-22 |
| 40<br>41<br>42<br>43<br>44<br>45<br>46<br>47<br>48<br>49 | Intergration with prior work, implications, transferability and contribution(s) to the field | <a href="#">#18</a> Short summary of main findings; explanation of how findings and conclusions connect to, support, elaborate on, or challenge conclusions of earlier scholarship; discussion of scope of application / generalizability; identification of unique contributions(s) to scholarship in a discipline or field | 12    |
| 50<br>51                                                 | Limitations                                                                                  | <a href="#">#19</a> Trustworthiness and limitations of findings                                                                                                                                                                                                                                                              | 12    |
| 52<br>53<br>54<br>55<br>56<br>57                         | Conflicts of interest                                                                        | <a href="#">#20</a> Potential sources of influence of perceived influence on study conduct and conclusions; how these were managed                                                                                                                                                                                           | 1     |
| 58<br>59<br>60                                           | Funding                                                                                      | <a href="#">#21</a> Sources of funding and other support; role of funders                                                                                                                                                                                                                                                    | 1     |

in data collection, interpretation and reporting

The SRQR checklist is distributed with permission of Wolters Kluwer © 2014 by the Association of American Medical Colleges. This checklist can be completed online using <https://www.goodreports.org/>, a tool made by the [EQUATOR Network](#) in collaboration with [Penelope.ai](#)

For peer review only

# BMJ Open

## Evaluating Antibiotic Stewardship by Interviewing Tertiary Care Hospital Staff in Kerala, India

|                                 |                                                                                                                                                                                                                                                                                                                                                                                                                                                                                                                                                                                                                                                                                                                                                                  |
|---------------------------------|------------------------------------------------------------------------------------------------------------------------------------------------------------------------------------------------------------------------------------------------------------------------------------------------------------------------------------------------------------------------------------------------------------------------------------------------------------------------------------------------------------------------------------------------------------------------------------------------------------------------------------------------------------------------------------------------------------------------------------------------------------------|
| Journal:                        | <i>BMJ Open</i>                                                                                                                                                                                                                                                                                                                                                                                                                                                                                                                                                                                                                                                                                                                                                  |
| Manuscript ID                   | bmjopen-2018-026193.R1                                                                                                                                                                                                                                                                                                                                                                                                                                                                                                                                                                                                                                                                                                                                           |
| Article Type:                   | Research                                                                                                                                                                                                                                                                                                                                                                                                                                                                                                                                                                                                                                                                                                                                                         |
| Date Submitted by the Author:   | 20-Dec-2018                                                                                                                                                                                                                                                                                                                                                                                                                                                                                                                                                                                                                                                                                                                                                      |
| Complete List of Authors:       | Baubie, Kelsey; University of Wisconsin Madison, Infectious Disease<br>Shaughnessy, Catherine; University of Wisconsin Madison, Infectious Disease<br>Kostiuk, Lia; University of Wisconsin Madison<br>Joseph, Mariam; Amrita Institute of Medical Sciences and Research Centre, Pharmacy<br>Safdar, Nasia ; University of Wisconsin Madison, Infectious Disease;<br>William S. Middleton Memorial Veterans Hospital, Research<br>Singh, Sanjeev; Amrita Institute of Medical Sciences and Research Centre, Hospital Administration<br>Siraj, Dawd; University of Wisconsin Madison, Infectious Disease<br>Sethi, Ajay; University of Wisconsin Madison, Population Health Sciences<br>Keating, Julie; William S. Middleton Memorial Veterans Hospital, Research |
| <b>Primary Subject Heading</b>: | Global health                                                                                                                                                                                                                                                                                                                                                                                                                                                                                                                                                                                                                                                                                                                                                    |
| Secondary Subject Heading:      | Infectious diseases                                                                                                                                                                                                                                                                                                                                                                                                                                                                                                                                                                                                                                                                                                                                              |
| Keywords:                       | PUBLIC HEALTH, QUALITATIVE RESEARCH, INFECTIOUS DISEASES                                                                                                                                                                                                                                                                                                                                                                                                                                                                                                                                                                                                                                                                                                         |
|                                 |                                                                                                                                                                                                                                                                                                                                                                                                                                                                                                                                                                                                                                                                                                                                                                  |

SCHOLARONE™  
Manuscripts



1  
2  
3 Evaluating Antibiotic Stewardship by Interviewing Tertiary Care Hospital Staff in Kerala,  
4 India  
5  
6

7 Kelsey Baubie, MS, MPH\*<sup>1</sup>, Catherine Shaughnessy, BS\*<sup>1</sup>, Lia Kostiuk, MD<sup>1</sup>, Mariam Varsha  
8 Joseph, PharmD<sup>2</sup>, Nasia Safdar MD, PhD<sup>1,4</sup>, Sanjeev Singh, MBBS, PhD, MPhil, DCH<sup>3</sup>, Dawd  
9 Siraj, MD, MPH<sup>1</sup>, Ajay Sethi, PhD<sup>5</sup>, Julie Keating, PhD<sup>4</sup>

10 \*denotes equal contribution  
11  
12  
13

14 1. Department of Infectious Disease, University of Wisconsin Madison School of Medicine  
15 and Public Health, Madison, Wisconsin, USA

16 2. Department of Pharmacy, Amrita Institute of Medical Sciences and Research Centre,  
17 Cochin, Kerala, India

18 3. Department of Hospital Administration, Amrita Institute of Medical Sciences and  
19 Research Centre, Cochin, Kerala, India

20 4. Department of Research, William S. Middleton Memorial Veterans Administration  
21 Hospital, Madison, Wisconsin, USA

22 5. Department of Population Health Sciences, University of Wisconsin Madison School of  
23 Medicine and Public Health, Madison, Wisconsin, USA  
24  
25  
26  
27  
28

29 Corresponding author:

30 Kelsey Baubie, Clinical Science Center, 600 Highland Ave Madison WI 53792

31 Phone: 608-262-9223

32 Email: baubie@wisc.edu  
33  
34  
35

36 Email addresses for other authors: Catherine Shaughnessy, cshaugh@medicine.wisc.edu

37 Lia Kostiuk, lkostiuk@wisc.edu

38 Mariam Varsha Joseph, mariamvj@aims.amrita.edu

39 Nasia Safdar, ns2@medicine.wisc.edu

40 Sanjeev Singh, sanjeevksingh@aims.amrita.edu

41 Dawd Siraj, dssiraj@medicine.wisc.edu

42 Ajay Sethi, aksethi@wisc.edu

43 Julie Keating, jakeating@medicine.wisc.edu  
44  
45  
46  
47

48 Word count of manuscript body: 2,865  
49

50 Contributorship Statement: KB and CS created the interview guides, wrote the manuscript,  
51 and conducted on-site data collection. LK assisted with on-site data collection, writing and  
52 editing of the manuscript. MVJ assisted with on-site data collection and editing of the  
53 manuscript. NS and SS edited the manuscript and devised the project. DS assisted with  
54  
55  
56  
57  
58  
59  
60

1  
2  
3 writing and editing the manuscript. AS helped with the grant and edited the manuscript. JK  
4 edited the manuscript.  
5

6  
7 Data sharing statement: No additional data available.  
8

9 Funding: This project was funded by the University of Wisconsin Global Health Institute.

10 Conflict of interests: None of the authors report any conflict of interests.  
11  
12  
13  
14  
15  
16

## 17 Abstract

18  
19 Objectives: To determine what barriers and facilitators to antibiotic stewardship exist  
20 within a healthcare facility.  
21

22  
23 Setting: 1300 bed tertiary care private hospital located in the state of Kerala, India.  
24

25 Participants: 31 semi-structured interviews and 4 focus groups with hospital staff ranging  
26 from physicians, nurses, pharmacists, and a clinical microbiologist.  
27

28  
29 Results: Key facilitators of antibiotic stewardship (AS) at the hospital included a dedicated  
30 committee overseeing appropriate inpatient antibiotic use, a prompt microbiology lab, a  
31 high level of AS understanding among staff, established guidelines for empiric prescribing,  
32 and an easily-accessible antibiogram. We identified the following barriers: limited access to  
33 clinical pharmacists, physician immunity to change regarding stewardship policies,  
34 infrequent antibiotic de-escalation, high physician workload, an incomplete electronic  
35 medical record (EMR), inadequate antibiotic stewardship program (ASP) physical visibility,  
36 and high antibiotic use in the community.  
37  
38

39 Conclusions: Opportunities for improvement at this institution include increasing  
40 accessibility to clinical pharmacists, implementing strategies to overcome physician  
41 immunity to change, and establishing a more accessible and complete EMR. Our findings  
42 are likely to be of use to institutions developing ASPs in lower resource settings.  
43  
44

45 Keywords: Antibiotic stewardship, antibiotic stewardship programs, antibiotic resistance,  
46 India, SEIPS  
47  
48  
49  
50  
51  
52  
53  
54  
55  
56  
57  
58  
59

### Strengths and limitations of this study

- Our study is the first of its kind to systematically examine the key barriers and facilitators of implementing an ASP in a low/middle-income country (LMIC).
- We interviewed a variety of healthcare workers: physicians, nurses, clinical pharmacists, and a microbiologist.
- This was a single center study. Thus, transferability of our findings to more resource-limited rural hospitals within India or to other LMIC may not be possible.
- We did not conduct direct observations of practice to correlate with self-reporting.

### Background

The United Nations declared antimicrobial resistance to be “the greatest and most urgent global risk” in 2016<sup>1</sup>. Antibiotic overuse and misuse drives antimicrobial resistance<sup>2</sup>. In India, rates of infections caused by antibiotic resistant bacteria are high and increasing<sup>3-11</sup>. Given that the main driver of antibiotic resistance is antibiotic use and misuse, antibiotic stewardship (AS) and antibiotic stewardship programs (ASP) have a critical role in promoting judicious antibiotic use<sup>12</sup>.

In a recent review of AS studies spanning every continent, Davey et al. found ASPs were effective in decreasing treatment duration and increasing adherence to antibiotic use policy<sup>13</sup>. While the evidence for ASP effectiveness is growing, there is considerable variation among ASPs in size, activities, and scope. Newly published consensus of an ASP core elements checklist includes experts from twelve countries on six continents and should be considered by healthcare centers when considering their individual ASP, no matter their economic status<sup>14</sup>. This checklist includes some of the elements we identified as areas of strength in this institution: senior hospital management support, a formal ASP, and timely access to laboratory results. Still, we recognize low and middle income countries

1  
2  
3 (LMIC) face ASP implementation challenges including limited diagnostic lab capability,  
4  
5 inadequate awareness, limited access to quality antibiotics, and high patient census<sup>15</sup>. To  
6  
7 date, few studies have explored the challenges facilities in India face carrying out ASPs,  
8  
9 such as less available manpower and money dedicated to maintaining a detailed electronic  
10  
11 medical record (EMR) compared to higher income country counterparts<sup>16-18</sup>. EMR systems  
12  
13 have been found to be one of the most effective ways of keeping records on patient care  
14  
15 and allow for easier discussion and feedback on antibiotic choices<sup>17</sup>. We selected India  
16  
17 because, as mentioned, antibiotic resistance rates are high and increasing, and our study  
18  
19 facility had recently implemented an ASP to address this issue. Thus, we undertook a  
20  
21 prospective qualitative study in Kerala, India to examine the barriers and facilitators to  
22  
23 practicing AS in a LMIC healthcare setting and to identify opportunities to improve AS.  
24  
25  
26  
27

## 28 29 Methods

### 30 31 *Location*

32  
33 In January 2018, we conducted a qualitative study to understand the barriers and  
34  
35 facilitators to AS at a 1300 bed tertiary care private hospital located in the state of Kerala,  
36  
37 India. This urban hospital, which includes 275 intensive care beds, provides free or  
38  
39 subsidized advanced care for two-thirds of its patient population. AS activities began in  
40  
41 2015. The hospital's ASP, members of which include internists, surgeons, a microbiologist,  
42  
43 critical care physicians, infection control nurses, and an administrator, began in 2016. The  
44  
45 Chief Medical Officer, the head of both the institution as a whole and the ASP itself, initiated  
46  
47 the antibiotic stewardship meetings, infectious disease rounds, chart review of patients.  
48  
49 Committee members are a mix of junior, mid-level, and senior staff and serve for at least  
50  
51 two years with the option to continue involvement afterward.  
52  
53  
54  
55  
56  
57  
58  
59  
60

### *Study population*

Physicians, nurses, clinical pharmacists, and a microbiologist were identified by the on-site study team by emailing information to staff regarding the project and subsequently approached staff in-person to identify interested participants. We included senior faculty and healthcare professionals working on the critical care medicine and infectious disease teams for interview. Exclusion criteria included non-English speaking staff and staff who were subordinates to any member of the study team.

### *Data collection*

We conducted 31 semi-structured interviews and 4 focus groups with hospital staff involved in AS. Interview guides were developed based on the Systems Engineering Initiative for Patient Safety (SEIPS) framework. This framework evaluates the interactions between the people, organization, tasks, tools/technology, and environment of a given work system, allowing for identification of key areas for improvement or intervention<sup>19</sup>. Interviews were conducted in private rooms at the hospital, and were audio recorded after obtaining verbal consent from the participant. No personal information was recorded, and each interview lasted between 10 and 30 minutes. The interview guides used have been included for reference (Appendix A).

### *Analysis*

All interviews were transcribed and analyzed deductively using the SEIPS framework. One member from the study team manually coded the interview transcripts. Quotations from transcribed interviews were sorted into the SEIPS categories of person, organization, tasks, tools/technology, and physical environment. After all study team members agreed on the identified themes from the interviews, the most prominent

1  
2  
3 barriers and facilitators to AS were identified in each category based on number of  
4 participant responses. We used the Standards for Reporting Qualitative Research (SRQR)  
5  
6 guidelines<sup>20</sup>.  
7

### 8 9 10 *Ethics approval*

11  
12 The Institutional Review Board at the University of Wisconsin-Madison granted this  
13 study exemption from full review. The Internal Ethics Committee at the participating  
14 hospital reviewed the study and granted approval (IRB# 2017-1268).  
15  
16  
17  
18

### 19 20 *Patient and Public Involvement statement*

21  
22 The development of our study was informed by many patients' preference to get  
23 antibiotics right away, just in case these drugs help. This can influence how healthcare  
24 providers deal with prescribing. We did not involve patients with the design or conduct of  
25  
26 the study. Results will be disseminated to the involved healthcare workers at staff meetings  
27 and electronic communications.  
28  
29  
30  
31  
32

### 33 34 **Results**

35  
36 In total, we interviewed 45 hospital faculty and staff. Participants included  
37 individual interviews with physicians (27), clinical pharmacists (3), and one microbiologist.  
38  
39 We also conducted four focus groups consisting of ASP team members, pharmacists (two  
40 groups), and infection control nurses with two to five participants each.  
41  
42  
43  
44

### 45 46 *Organization*

47  
48 The hospital's ASP is the key organizational component of promoting judicious  
49 antibiotic use and is in addition to the three clinical pharmacists and one infection control  
50 nurse the hospital uses as dedicated, full-time stewardship positions. The ASP team  
51 evaluates the list of inpatients receiving antibiotics to evaluate "The Five R's" of antibiotic  
52  
53  
54  
55  
56  
57  
58  
59  
60

1  
2  
3 prescribing: right drug, right dose, right frequency, right duration, and right indication.  
4  
5 When the team identifies opportunities for antibiotic de-escalation or reduced duration, a  
6  
7 clinical pharmacist member contacts the prescribing physician to issue treatment  
8  
9 recommendations, and the prescribing physician decides whether to modify treatment.  
10  
11 Typically the hospital sees 30 “higher antibiotic” prescriptions a day; these are the cases  
12  
13 the ASP reviews. Usually the committee has suggestions for five or six cases, most often  
14  
15 communicating these with staff via email for recording/tracking purposes. In-person  
16  
17 communication during rounds, telephone calls, and text messages to the microbiologists in  
18  
19 the lab are also utilized as they are more effective methods of quick communication.  
20  
21  
22  
23

24 According to about half of respondents, hospital administrative leadership  
25  
26 champions the ASP by being involved in the meetings, handling difficult conversations with  
27  
28 physicians, and instilling confidence in all staff that the ASP is working with them to  
29  
30 improve patient care. Staff in turn view their institution’s ASP as a key facilitator of AS at  
31  
32 the hospital (Table 1, quotes 1-3). In addition to the ASP itself, 17 interviewees regarded  
33  
34 the microbiology lab as a key facilitator of AS. Staff praised the 24-hour lab’s promptness  
35  
36 and the rapidity with which lab staff uploaded results into the EMR. In addition, many  
37  
38 physicians relied on the microbiologist’s expertise for help identifying microorganisms in  
39  
40 complicated infections (Table 1, quotes 4 and 5). As one physician said, “If we are thinking  
41  
42 about a gram positive illness and we get a culture that’s gram negative, which is grown very  
43  
44 quickly, we totally change our report.”  
45  
46  
47  
48  
49

50 Despite having an effective stewardship program and lab, 16 interviewees identified  
51  
52 limited clinical pharmacist availability as a barrier to AS. In India, clinical pharmacists must  
53  
54 complete a six year Doctorate program from an accredited university to receive licensure,  
55  
56  
57  
58  
59

1  
2  
3 and many physicians recognized clinical pharmacists' knowledge as a critical component of  
4 patient care. However, several departments had one clinical pharmacist and many had  
5 none at all. Staff worried this lack of pharmacist access may cause clinicians to miss drug  
6 interactions or prescribe antibiotics at incorrect dosages (Table 1, quotes 6-8).  
7  
8  
9  
10  
11

### 12 *Person*

13  
14  
15 During our interviews, staff identified AS activities, such as using the correct  
16 antibiotic at the correct dose, as a key component of reducing antibiotic resistance. In  
17 addition, staff mentioned they often heard about AS at work. This high level of awareness  
18 among staff facilitates AS practices (Table 1, quotes 9-11).  
19  
20  
21  
22  
23

24 While most interviewed staff demonstrated AS policy understanding, they revealed  
25 many physicians resisted accepting suggestions from the ASP. Moreover, several physicians  
26 and pharmacists worried other physicians did not acknowledge pharmacists' contributions  
27 to patient care. According to nine interviewees, this immunity to change may impede AS  
28 practices and contribute to antibiotic resistance through incorrect antibiotic dosing and  
29 duration (Table 1, quotes 12 and 13). One clinician described this phenomena for us by  
30 saying, "I think clinicians are empowered to think that they know best. They need to  
31 recognize the roles of the microbiologists and the pharmacists and should not feel low that  
32 they have asked for help." A nurse we spoke to distilled the issue; "Challenges come from  
33 navigating human behavior."  
34  
35  
36  
37  
38  
39  
40  
41  
42  
43  
44  
45  
46

### 47 *Tasks*

48  
49  
50 Staff in 12 interviews felt that clinicians follow established guidelines when  
51 prescribing antibiotics when the cause of illness is not yet known. Following a clinical  
52 evaluation, the physician orders a culture and initiates a broad-spectrum antibiotic.  
53  
54  
55  
56  
57  
58  
59  
60



1  
2  
3 Physicians then use this culture result to modify the original antibiotic used. This process,  
4  
5 often called de-escalation, involves selecting an antibiotic which has a more specific  
6  
7 spectrum or stopping antibiotic treatment if the cultures do not identify a bacterial  
8  
9 infection (Table 1, quote 14).  
10

11  
12 As a tertiary care facility, this hospital frequently treats high-risk patients who have  
13  
14 acquired resistant infections in the community or at other hospitals. Therefore, physicians  
15  
16 at our study institution often feel compelled to empirically prescribe broad-spectrum  
17  
18 antibiotics while awaiting culture results. However, physicians often forget or refuse to de-  
19  
20 escalate antibiotic use due to workload or fear of losing the patient. In our study, physicians  
21  
22 and pharmacists in eight interviews worried this lack of de-escalation may increase the risk  
23  
24 of antibiotic resistant infections (Table 1, quote 15) and cited de-escalation as the most  
25  
26 important issue regarding antibiotic prescribing. Similarly, nine interviewed staff members  
27  
28 feared their high workloads may negatively impact their ability to always judiciously  
29  
30 prescribe antibiotics. Physicians noted they are often unable to spend sufficient time  
31  
32 evaluating a patient and this, along with uncertainty over what exact drugs the patient has  
33  
34 already taken pre-admission, leads to antibiotic over-prescription (Table 1, quotes 16 and  
35  
36 17). This happens because if a patient has already taken a certain class of antibiotic and  
37  
38 they haven't worked, prescribing more is not going to help.  
39  
40  
41  
42  
43  
44

#### 45 *Tools/Technology*

46

47  
48 The hospital microbiologist and clinical pharmacists update the hospital  
49  
50 antibiogram annually. The antibiogram, which gives the percent of pathogens susceptible  
51  
52 to various antimicrobial agents, is accessible on the hospital intranet and divided into Gram  
53  
54 positive, Gram negative, and yeast. In 17 interviews, staff members identified this user-  
55  
56  
57  
58  
59  
60

1  
2  
3 friendly tool as a key facilitator in selecting antibiotics based on hospital resistance  
4  
5 patterns, a critical component of AS (Table 1, quote 18).  
6  
7

8 In addition to the antibiogram, this hospital also utilizes an EMR, which to save  
9  
10 money is built and maintained by the hospital's Information Technology department. The  
11  
12 EMR is used to store information on inpatients, a useful addition for identifying immediate  
13  
14 drug interactions and thereby reducing harm. However, the EMR does not contain a  
15  
16 patient's full scope of antibiotic use, including antibiotic history, duration, and dose. This  
17  
18 incompleteness often forces physicians and pharmacists to refer to a patient's paper health  
19  
20 record, which one pharmacist described as a "tedious" process (Table 1, quote 19).  
21  
22 Moreover, physician workflow does not include entering antibiotic data into the EMR. Due  
23  
24 to high work volume, physicians depend on the ward secretary, nursing assistants, or  
25  
26 research assistants to update the EMR. As one physician explained, "I see 80 patients a day.  
27  
28 So it's not possible for me to spend so much time logging in, recording all this. I don't think  
29  
30 it's possible unless I had someone sitting next to me doing just that." (Table 1, quote 20). A  
31  
32 dozen interviewed staff members identified this inability to quickly access the full scope of  
33  
34 a patient's antibiotic history as a barrier to judiciously prescribing antibiotics.  
35  
36  
37  
38  
39

#### 40 *Environment*

41  
42  
43 Despite having a highly engaged AS team, staff mentioned the hospital did not have  
44  
45 signs or posters to increase stewardship awareness, which several staff identified as a  
46  
47 potentially useful addition. A few interviewees thought AS policies were sometimes printed  
48  
49 and posted but did not "stand out." These printed antibiotic prescribing protocols were not  
50  
51 visible to all staff, and 23 interviewed staff members mentioned this limited visibility may  
52  
53 inhibit widespread AS awareness. (Table 1, quotes 21 and 22)  
54  
55  
56  
57  
58  
59  
60

1  
2  
3 In addition, staff identified high local antibiotic use as a barrier to stewardship. As  
4 patients can purchase antibiotics over the counter or have been recently hospitalized at  
5 another facility, many patients enter the hospital already using antibiotics. These high use  
6 rates often lead to antibiotic resistant infections in the community, forcing physicians to  
7 prescribe broad-spectrum antibiotics. Furthermore, several staff feared the impact of high  
8 antibiotic use in animal husbandry and fisheries on spreading resistance. Seven staff  
9 members wished for enhanced antibiotic prescribing regulations and more AS awareness  
10 in greater India (Table 1, quote 23).  
11  
12  
13  
14  
15  
16  
17  
18  
19  
20  
21

## 22 **Discussion**

23  
24 Our study is the first of its kind in the English language to systematically examine  
25 key barriers and facilitators of implementing ASP in a LMIC tertiary hospital. Using the  
26 SEIPS model, we examined the implementation of an ASP at a large tertiary care hospital in  
27 order to identify opportunities to improve this program.  
28  
29  
30  
31  
32

33 We found that limited access to clinical pharmacists, physician immunity to change  
34 resulting in infrequent antibiotic de-escalation, high physician workload, an inadequate  
35 EMR, inadequate physical visibility of stewardship activities, and high antibiotic use in the  
36 community were major barriers to effective ASP implementation. The presence of a prompt  
37 microbiology laboratory, high level of understanding of AS among staff, easily accessible  
38 antibiogram, and established guidelines for empiric prescribing were identified as  
39 important facilitators of an effective ASP in this hospital. As Ravi et al. (2017) discovered,  
40 we found committed leadership from the administrator was a major factor as well<sup>17</sup>.  
41  
42  
43  
44  
45  
46  
47  
48  
49  
50  
51

52 Our study found limited access to pharmacists was a barrier for an effective ASP.  
53 Multidisciplinary rounds with guideline-based antibiotic recommendations for specific  
54  
55  
56  
57  
58  
59  
60

1  
2  
3 infections have been found to decrease use and duration of both broad spectrum and high-  
4  
5 end, reserve antibiotics<sup>21</sup>. Clinical pharmacists can provide real-time decision support  
6  
7 which could significantly improve rates of antibiotic tailoring to culture data<sup>22</sup>.  
8  
9 Empowering clinical pharmacists to identify highly misused antibiotics, design guideline-  
10  
11 based de-escalation protocols, and participate in multidisciplinary rounds may improve the  
12  
13 quality of ASP.  
14  
15

16  
17 Physician resistance to changes in antibiotic use practices was identified as a barrier  
18  
19 to an effective ASP. Factors which influence physician antibiotic prescribing habits include  
20  
21 anxiety about missing an infection and the antibiotic prescribing behavior of peers<sup>23</sup>. This  
22  
23 is an important active area of research; interventions such as encouraging reflection on  
24  
25 practice, the use of audit and feedback, small-group learning with discussions and  
26  
27 engagement by senior clinicians, and deploying multidisciplinary teams including clinical  
28  
29 pharmacists have been shown to improve prescriber behavior<sup>24,25</sup>. In LMIC settings, we  
30  
31 recommend leadership should actively promote ASP activities and their value. Feedback on  
32  
33 antibiotic usage and patterns should be disseminated to improve adherence to local or  
34  
35 national guidelines at this facility.  
36  
37  
38  
39

40  
41 We found that the usability and accessibility of the EMR were another barrier to an  
42  
43 effective ASP. Adoption of an EMR can improve ASP by providing a centralized location for  
44  
45 microbiology results and other relevant clinical data<sup>26</sup>. However, the expense of acquiring  
46  
47 and optimizing an EMR system to harness its full potential makes this intervention difficult  
48  
49 to implement, particularly in LMIC settings<sup>27</sup>.  
50  
51

52  
53 Our study identified high and indiscriminate community-based antibiotic use as one  
54  
55 reason why AS is such a challenge at our study site. Variably-enforced regulations on  
56  
57  
58  
59

1  
2  
3 antibiotic dispensing and the availability of antibiotics without a prescription is a  
4  
5 widespread problem in many countries, including India<sup>28</sup>. The broad and unregulated use  
6  
7 of antibiotics in animal feed and fisheries compounds this barrier<sup>29</sup>. ASP in healthcare  
8  
9 settings can be complemented by AS in the community for all uses of antibiotics, with an  
10  
11 inclusive “One Health” approach to addressing resistance<sup>30</sup>. While not mentioned by any  
12  
13 staff, extensive pollution from pharmaceutical production has also been noted as a driver of  
14  
15 resistant bacteria, and this too should be addressed in a One Health approach<sup>31</sup>. The state  
16  
17 which our study institution exists, Kerala, is currently the only state in India to have an  
18  
19 antibiotic policy. Efforts for federal antibiotic use regulations have some support, but  
20  
21 nothing has yet come to fruition.  
22  
23  
24  
25

26  
27 Our study has limitations. First, this was a single center study. Thus, transferability  
28  
29 of our findings to more resource-limited rural hospitals within India or to other LMIC may  
30  
31 not be possible. Second, we did not conduct direct observations of practice to correlate  
32  
33 with self-reporting. Future studies may identify additional barriers and facilitators by  
34  
35 implementing direct observation approaches to collect data on stewardship practices. We  
36  
37 also asked staff members if they would like to be interviewed, thus introducing the  
38  
39 possibility only those who were really invested in AS would agree.  
40  
41  
42  
43  
44

## 45 Conclusion

46  
47 The use of the SEIPS model to analyze an ASP in an LMIC identified barriers and  
48  
49 facilitators within the healthcare work system. Opportunities for improvement at this  
50  
51 institution include increasing accessibility to clinical pharmacists, implementing strategies  
52  
53 to overcome physician immunity to change, and establishing a more accessible and  
54  
55  
56  
57  
58  
59  
60

1  
2  
3 complete EMR. Interventions which account for and address barriers and strengthen  
4  
5 facilitators should be tested in future studies for their effect on antimicrobial usage and  
6  
7 resistance.  
8  
9

### 10 11 12 Author Statement

13  
14 KB created the interview guides, conducted in-person interviews, and wrote, edited, and  
15  
16 prepared the manuscript. CS created the interview guides, conducted in-person interviews,  
17  
18 and wrote/edited the manuscript. JK edited the manuscript. LK conducted on-site data  
19  
20 collection and wrote/edited the manuscript. MVJ assisted with on-site data collection and  
21  
22 edited the manuscript. SS devised the project and edited the manuscript. NS obtained  
23  
24 funding, devised the project, and edited the manuscript. AS assisted with the grant and  
25  
26 edited the manuscript. DS assisted with the grant and wrote/edited the manuscript.  
27  
28  
29  
30  
31  
32

### 33 References

- 34 1. United Nations (2016). Political Declaration of the high-level meeting of the General  
35 Assembly on antimicrobial resistance. *Bulletin of the General Assembly, Seventy-First*  
36 *Session: Global health and foreign policy*. Available at:  
37 [https://digitallibrary.un.org/record/842813/files/A\\_71\\_L-2-EN.pdf](https://digitallibrary.un.org/record/842813/files/A_71_L-2-EN.pdf)  
38
- 39 2. Organisation for Economic Co-operation and Development (2016). Antimicrobial  
40 resistance: policy insights. Available at:  
41 [https://www.oecd.org/health/health-systems/AMR-Policy-Insights-](https://www.oecd.org/health/health-systems/AMR-Policy-Insights-November2016.pdf)  
42 [November2016.pdf](https://www.oecd.org/health/health-systems/AMR-Policy-Insights-November2016.pdf)  
43  
44
- 45 3. Bammigatti, C., Doradla, S., Belgode, H. N., Kumar, H., & Swaminathan, R. P. (2017).  
46 Healthcare Associated Infections in a Resource Limited Setting. *Journal of Clinical*  
47 *and Diagnostic Research: JCDR*, 11(1), OC01–OC04.  
48 <http://doi.org/10.7860/JCDR/2017/23076.9150>  
49  
50
- 51 4. Barker, A. K., Brown, K., Ahsan, M., Sengupta, S., & Safdar, N. (2017). Social  
52 determinants of antibiotic misuse: a qualitative study of community members in  
53 Haryana, India. *BMC Public Health*, 17, 333. [http://doi.org/10.1186/s12889-017-](http://doi.org/10.1186/s12889-017-4261-4)  
54 [4261-4](http://doi.org/10.1186/s12889-017-4261-4)  
55  
56  
57  
58  
59  
60

- 1  
2  
3 5. Barker, A. K., Brown, K., Ahsan, M., Sengupta, S., & Safdar, N. (2017). What drives  
4 inappropriate antibiotic dispensing? A mixed-methods study of pharmacy employee  
5 perspectives in Haryana, India. *BMJ Open*, 7(3), e013190.  
6 <http://doi.org/10.1136/bmjopen-2016-013190>  
7  
8
- 9 6. Gandra, S., Mojica, N., Klein, E. Y., Ashok, A., Nerurkar, V., Kumari, M., Ramesh, U.,  
10 Sunanda, D., Vadwai, V., Das, B., Laxminarayan, R. (2016). Trends in antibiotic  
11 resistance among major bacterial pathogens isolated from blood cultures tested at a  
12 large private laboratory network in India, 2008–2014. *International Journal of*  
13 *Infectious Diseases*, 50, 75–82. <http://doi.org/10.1016/j.ijid.2016.08.002>  
14  
15
- 16 7. Khety, Z., Mohanta, G., Jain, S., Dawoodi, S. (2017). Changing Antimicrobial  
17 Resistance Pattern of Isolates from an ICU Over a 3 Year period. *Journal of the*  
18 *Association of Physicians of India*. 65: 13-16. Available at:  
19 [japi.org/february\\_2017/02\\_oa\\_changing\\_antimicrobial\\_resistance\\_pattern.pdf](http://japi.org/february_2017/02_oa_changing_antimicrobial_resistance_pattern.pdf)  
20  
21
- 22 8. Moolchandani, K., Sastry, A. S., Deepashree, R., Sistla, S., Harish, B., & Mandal, J.  
23 (2017). Antimicrobial Resistance Surveillance among Intensive Care Units of a  
24 Tertiary Care Hospital in Southern India. *Journal of Clinical and Diagnostic Research :*  
25 *JCDR*, 11(2), DC01–DC07. <http://doi.org/10.7860/JCDR/2017/23717.9247>  
26  
27
- 28 9. Odsbu, I., Khedkar, S., Lind, F., Khedkar, U., Nerkar, S. S., Orsini, N., Tamhankar, A.J.,  
29 Stålsby Lundborg, C. (2018). Trends in Resistance to Extended-Spectrum  
30 Cephalosporins and Carbapenems among *Escherichia coli* and *Klebsiella* spp. Isolates  
31 in a District in Western India during 2004–2014. *International Journal of*  
32 *Environmental Research and Public Health*, 15(1), 155.  
33 <http://doi.org/10.3390/ijerph15010155>  
34  
35
- 36 10. Satyanarayana, S., Kwan, A., Daniels, B., Subbaraman, R., McDowell, A., Bergkvist, S.,  
37 Das, R.K., Das, V., Das, J., Pai, M. (2016). Use of standardised patients to assess  
38 antibiotic dispensing for tuberculosis by pharmacies in urban India: a cross-  
39 sectional study, *The Lancet Infectious Diseases*, 16(11): 1261-1268.  
40 [https://doi.org/10.1016/S1473-3099\(16\)30215-8](https://doi.org/10.1016/S1473-3099(16)30215-8)  
41  
42
- 43 11. Sharma, M., Damlin, A., Pathak, A., Stålsby Lundborg, C. (2015). Antibiotic  
44 Prescribing among Pediatric Inpatients with Potential Infections in Two Private  
45 Sector Hospitals in Central India. *PLOS ONE* 10(11): e0142317.  
46 <https://doi.org/10.1371/journal.pone.0142317>  
47  
48
- 49 12. Infectious Diseases Society of America (2018). Promoting Antimicrobial  
50 Stewardship in Human Medicine. Available at:  
51 [http://www.idsociety.org/Stewardship\\_Policy/](http://www.idsociety.org/Stewardship_Policy/)  
52  
53
- 54 13. Davey, P., Marwick, C., Scott, C.L., Charani, E., McNeil, K., Brown, E., Gould, I.M.,  
55 Ramsay, C.R., Michie, S. (2017) Interventions to improve antibiotic prescribing  
56  
57  
58  
59

practices for hospital inpatients. *Cochrane Database Syst Rev.* 2017 Feb 9 (2). Doi: 10.1002/14651858.CD003543.pub4

14. Pulcini, C., Binda, F., Lamkang, A.S., Trett, A., Charani, E., Goff, D.A., Harbarth, S., Hinrichsen, S.L., Levy-Hara, G., Mendelson, M., Nathwani, D., Gunturu, R., Singh, S., Srinivasan, A., Thamlikitkul, V., Thursky, K., Vlieghe, E., Wertheim, H., Zeng, M., Gandra, S., Laxminarayan, R. (2018). Developing core elements and checklist items for global hospital antimicrobial stewardship programmes: a consensus approach, *Clinical Microbiology and Infection* doi: 10.1016/j.cmi.2018.03.033.
15. Cox J.A., Vlieghe E., Mendelson M., Wertheim H., Ndegwa L., Villegas M.V., Gould I., Levy Hara G. (2017) Antibiotic stewardship in low-and middle-income countries: 'same, but different'?, *Clinical Microbiology and Infection*. doi: 10.1016/j.cmi.2017.07.010
16. Shah, N., Joshi, A., & Ganguly, B. (2017) Impact of Antibiotic Stewardship Program on Prescribing Pattern of Antimicrobials in Patients of Medical Intensive Care Unit. *J Clin. Diagn Res.* July 2017 11(7): 11-15 doi: [10.7860/JCDR/2017/27171.10237](https://doi.org/10.7860/JCDR/2017/27171.10237)
17. Shafiq, N., Praveen Kumar, M., Gautam, V. et al. (2016). Antibiotic stewardship in a tertiary care hospital of a developing country: establishment of a system and its application in a unit--GASP Initiative. *Infection* 44(5): 651-659. <https://doi.org/10.1007/s15010-016-0913-z>
18. Ravi, N., Laha, A., Hmar, L., Chatterjee, S., Goswami, J., Goel, G., Dhar, K., Ghosh, T., Chatterjee, S., Datta, S.S., Bhattacharya, S. (2017). Exploring the prescribing behaviours and the mind of antibiotic prescribers is critical for a successful antibiotic stewardship program: Results of a survey from Eastern India. *Indian Journal of Medical Microbiology*, 35(2): 299-301. Doi: 10.4103/ijmm.IJMM\_17\_133.
19. Carayon, P., Schoofs Hundt, A., Karsh, B., Gurses, A., Alvarado, C., Smith, M., Flatley Brennan P. (2006). Work system design for patient safety: the SEIPS model. *BMJ Quality & Safety* 2006; 15: 50-58. <http://dx.doi.org/10.1136/qshc.2005.015842>
20. O'Brien BC, Harris IB, Beckman TJ, Reed DA, Cook DA. Standards for reporting qualitative research: a synthesis of recommendations. *Acad Med.* 2014;89(9):1245-1251.
21. Rimawi, R.H., Mazer, M.A., Siraj, D.S., Gooch, M., Cook, P.P. (2013). "Impact of Regular Collaboration between Infectious Diseases and Critical Care Practitioners on Antimicrobial Utilization and Patient Outcome." *Crit Care Med.* 2013 Sep;41(9):2099-107.
22. Oxman, D.A., Adams, C.D. Deluke, G., et al. (2015). Improving Antibiotic De-escalation in Suspected Ventilator-Associated Pneumonia: An Observational Study



- 1  
2  
3 With a Pharmacist-Driven Intervention. *Journal of Pharmacy Practice* . Vol 28, Issue  
4 5, pp. 457 – 461. doi: 10.1177/0897190014527316  
5
- 6 23. Stålsby Lundborg C., Tamhankar A.J. (2014). Understanding and changing human  
7 behaviour—antibiotic mainstreaming as an approach to facilitate modification of  
8 provider and consumer behaviour. *Upsala Journal of Medical Sciences*.  
9 2014;119(2):125-133. doi:10.3109/03009734.2014.905664.  
10
- 11 24. Charani, E; Edwards, R; Sevdalis, N; et al. Behavior Change Strategies to Influence  
12 Antimicrobial Prescribing in Acute Care: A Systematic Review, *Clinical Infectious*  
13 *Diseases*, Volume 53, Issue 7, 1 October 2011, Pages 651–662.  
14
- 15 25. Livorsi, D., Comer, A., Matthias, M., Perencevich, E., Bair, M. (2015). Factors  
16 influencing antibiotic-prescribing decisions among inpatient physicians: a  
17 qualitative investigation. *Infection control and hospital epidemiology*.  
18 2015;36(9):1065-1072. doi:10.1017/ice.2015.136.  
19
- 20 26. Jawhari, B., Keenan, L., Zakus, D., et al. (2016). Barriers and facilitators to Electronic  
21 Medical Record (EMR) use in an urban slum. *International Journal of Medical*  
22 *Informatics*. Volume 94, October 2016, Pages 246-254.  
23
- 24 27. Forrest, G; Van Schooneveld, T; Kullar, R; et al. (2014). Use of Electronic Health  
25 Records and Clinical Decision Support Systems for Antimicrobial Stewardship,  
26 *Clinical Infectious Diseases*, Volume 59, Issue 3, Pages S122–S133.  
27
- 28 28. Shet A, Sundaresan S, Forsberg BC. Pharmacy-based dispensing of antimicrobial  
29 agents without prescription in India: appropriateness and cost burden in the private  
30 sector. *Antimicrobial Resistance and Infection Control*. 2015;4:55.  
31 doi:10.1186/s13756-015-0098-8.  
32
- 33 29. Chang Q, Wang W, Regev-Yochay G, Lipsitch M, Hanage WP. Antibiotics in  
34 agriculture and the risk to human health: how worried should we be? *Evolutionary*  
35 *Applications*. 2015;8(3):240-247. doi:10.1111/eva.12185.  
36
- 37 30. Centers for Disease Control (2017). One Health Basics. Available at:  
38 <https://www.cdc.gov/onehealth/basics/index.html>  
39
- 40 31. Lübbert, C., Baars, C., Dayakar, A. et al. Environmental pollution with antimicrobial  
41 agents from bulk drug manufacturing industries in Hyderabad, South India, is  
42 associated with dissemination of extended-spectrum beta-lactamase and  
43 carbapenemase-producing pathogens. *Infection* (2017) 45: 479. Doi:  
44 10.1007/s15010-017-1007-2  
45  
46  
47  
48  
49  
50  
51  
52  
53  
54  
55  
56  
57  
58  
59

**Table 1.** Themes identified from SEIPS components with corresponding representative quotations

| Theme                                    | Representative Quote                                                                                                                                                                                                                                                                                                                                               |
|------------------------------------------|--------------------------------------------------------------------------------------------------------------------------------------------------------------------------------------------------------------------------------------------------------------------------------------------------------------------------------------------------------------------|
| <b>Organization</b>                      |                                                                                                                                                                                                                                                                                                                                                                    |
| <i>Antimicrobial Stewardship Program</i> | 1. "We audit to make sure the right indication is happening. We check to see the dosage is correct and monitor what's happening here to track our prescriptions." (pharmacist)                                                                                                                                                                                     |
|                                          | 2. "Every year we do something with the antibiotic prescription program. Along with infection control. Usually a three-day program for doctors and one day is dedicated to antibiotic stewardship. Speakers from all over the country [come] and we take about 30-35 doctors a year and try to teach them about antibiotic stewardship." (infection control nurse) |
|                                          | 3. "The medical superintendent is a part of our team. I don't think you can get much higher up than that. The management is very supportive." (pharmacist)                                                                                                                                                                                                         |
| <i>Microbiology laboratory</i>           | 4. "Our microbiology lab is one of the best in the country. They are very reliable and help us immensely." (physician)                                                                                                                                                                                                                                             |
|                                          | 5. "Whenever the lab grows something in the culture, could be six hours, ten hours, we are called and told. So that does impact our management. If we are thinking about a gram positive illness and we get a culture that's gram negative, which is grown very quickly, we totally change our report. We are informed pretty quickly." (physician)                |

|                                                                                                                                                                                                                                                                                                                                    |                                                                                                                                                                                                                                                                                                                                                          |
|------------------------------------------------------------------------------------------------------------------------------------------------------------------------------------------------------------------------------------------------------------------------------------------------------------------------------------|----------------------------------------------------------------------------------------------------------------------------------------------------------------------------------------------------------------------------------------------------------------------------------------------------------------------------------------------------------|
| <p>1<br/>2<br/>3<br/>4<br/>5<br/>6<br/>7<br/>8<br/>9<br/>10<br/>11<br/>12<br/>13<br/>14<br/>15<br/>16<br/>17<br/>18<br/>19<br/>20<br/>21</p> <p><i>Clinical pharmacist availability</i></p>                                                                                                                                        | <p>6. “[Pharmacists are] not routinely in the ICU. I wish more pharmacists would tell physicians their doses or their drug interactions are wrong, but I don’t see them in the cardiac or pediatric ICU.” (physician)</p>                                                                                                                                |
|                                                                                                                                                                                                                                                                                                                                    | <p>7. “We have one pharmacist in our ICU, she visits. The problem with her is she’s overworked. She’s alone. She comes on the rounds only sometimes and comes around and checks the antibiotics dosing is correct. But duration and all others are decided by physicians. If there were more of them it would be much better.” (physician)</p>           |
|                                                                                                                                                                                                                                                                                                                                    | <p>8. “If a clinician is working alone, we may not have much concern about things that pharmacists are more aware of, like drug interactions. Routine medications may have interactions also, so pharmacists’ help is needed. That type of information is more with the pharmacists, not the clinicians. They are not always available.” (physician)</p> |
| <p><b>Person</b></p>                                                                                                                                                                                                                                                                                                               |                                                                                                                                                                                                                                                                                                                                                          |
| <p>22<br/>23<br/>24<br/>25<br/>26<br/>27<br/>28<br/>29<br/>30<br/>31<br/>32<br/>33<br/>34<br/>35<br/>36<br/>37<br/>38<br/>39<br/>40<br/>41<br/>42<br/>43<br/>44<br/>45<br/>46<br/>47<br/>48<br/>49<br/>50<br/>51<br/>52<br/>53<br/>54<br/>55<br/>56<br/>57<br/>58<br/>59<br/>60</p> <p><i>Antibiotic stewardship knowledge</i></p> | <p>9. “Antibiotic stewardship is a standardized practice with the right treatment at the right time.” (physician)</p>                                                                                                                                                                                                                                    |
|                                                                                                                                                                                                                                                                                                                                    | <p>10. “To me antibiotic stewardship is to start judicious antibiotics...I won’t say to start low antibiotics, I say to start optimum antibiotics.” (physician)</p>                                                                                                                                                                                      |
|                                                                                                                                                                                                                                                                                                                                    | <p>11. “Most of us here are aware of these ideas. For us, it’s about everything that has to do with a prescription. The ultimate aim is judicious use of antibiotics. We need to use the right antibiotics, the right dose.” (physician)</p>                                                                                                             |

|                                                                                                                                                                                 |                                                                                                                                                                                                                                                                                                                                                                                   |
|---------------------------------------------------------------------------------------------------------------------------------------------------------------------------------|-----------------------------------------------------------------------------------------------------------------------------------------------------------------------------------------------------------------------------------------------------------------------------------------------------------------------------------------------------------------------------------|
| <p>1<br/>2<br/>3<br/>4<br/>5<br/>6<br/>7<br/>8<br/>9<br/>10<br/>11<br/>12<br/>13<br/>14<br/>15<br/>16</p> <p><i>Physician resistance to antibiotic stewardship policies</i></p> | <p>12. "I think clinicians are empowered to think that they know best. They need to recognize the roles of the microbiologists and the pharmacists and should not feel low that they have asked for help."<br/>(physician)</p>                                                                                                                                                    |
|                                                                                                                                                                                 | <p>13. "Challenges come from navigating human behavior. Sometimes you'll recommend things but people just won't listen to you." (infection control nurse)</p>                                                                                                                                                                                                                     |
| <p>17<br/>18<br/>19</p> <p><b>Tasks</b></p>                                                                                                                                     |                                                                                                                                                                                                                                                                                                                                                                                   |
| <p>20<br/>21<br/>22<br/>23<br/>24<br/>25<br/>26<br/>27<br/>28</p> <p><i>Antibiotic prescribing</i></p>                                                                          | <p>14. "We have a high patient load and socioeconomic status is a big deal. Poverty and malnourished children are a reality. We can't wait for cultures. We have protocols to start them on antibiotics according to which ones have been most successful here."<br/>(physician)</p>                                                                                              |
|                                                                                                                                                                                 | <p>15. "I think it's a problem all over India, because the first antibiotics they prescribe is the carbapenems. And once they prescribe it is never de-escalated or rarely de-escalated. Basically they go, 'let's continue. What the culture says? I don't want to do that. Let's just continue because he's improving.' So it's a major, major, major problem." (physician)</p> |
| <p>41<br/>42<br/>43<br/>44<br/>45<br/>46<br/>47<br/>48<br/>49<br/>50<br/>51<br/>52<br/>53<br/>54<br/>55<br/>56<br/>57<br/>58<br/>59<br/>60</p> <p><i>Workload</i></p>           | <p>16. "Sometimes we are busy and we forget pre admission drugs which are missed because we are more worried about the current problems, and there are so many the patient is already on, that we need to continue." (physician)</p>                                                                                                                                              |
|                                                                                                                                                                                 | <p>17. "Our work here does affect how long you can spend on individual cases." (infection control nurse)</p>                                                                                                                                                                                                                                                                      |

| <b>Tools and Technology</b>                                        |                                                                                                                                                                                                                                                                                                                                                                                                                                               |
|--------------------------------------------------------------------|-----------------------------------------------------------------------------------------------------------------------------------------------------------------------------------------------------------------------------------------------------------------------------------------------------------------------------------------------------------------------------------------------------------------------------------------------|
| <i>Antibiogram</i>                                                 | 18. "It is an annual antibiogram. We divide it into gram positive, gram negative, and yeast. We also have a blood gram positive from blood isolates, negative, and yeast. They are separate. We follow international guidelines so for any isolate that is more than 30, we take them and follow the rules. Every year it is updated. This year they are trying to involve more pharmacists" (infection control nurse)                        |
| <i>Electronic medical record</i>                                   | 19. "If I look today at the record, I can only see what they took today. The current medications only. Not what they got yesterday. I can't trace the meropenem. To see all the drugs we have to go to the paper medical record room. It's a very tedious process. We don't know the dose or duration or all the drugs...if the patient returns in a few weeks, we don't know what they were taking and what will be effective." (pharmacist) |
|                                                                    | 20. "I see 80 patients a day. So it's not possible for me to spend so much time logging in, recording all this. I don't think it's possible unless I had someone sitting next to me doing just that." (physician)                                                                                                                                                                                                                             |
| <b>Environment</b>                                                 |                                                                                                                                                                                                                                                                                                                                                                                                                                               |
| <i>Posters or signs promoting antibiotic stewardship awareness</i> | 21. "It's only in protocols, which we do print out only for doctors. Nurses don't see that." (physician)                                                                                                                                                                                                                                                                                                                                      |
|                                                                    | 22. "We have some print-outs on our notice board about colistin and other higher-end antibiotics...but we don't have posters. As for the printouts, they aren't that catchy." (physician)                                                                                                                                                                                                                                                     |

1  
2  
3  
4 *High levels of community*  
5 *antibiotic use*  
6  
7  
8  
9  
10  
11  
12  
13  
14

23. "Outside the hospital this is a rampant problem in India. There is much abuse and misuse of antibiotics. Anyone can just go to a roadside pharmacy and describe their symptoms and get antibiotics over the counter just like that. They just go to the guy sitting there and get whatever. I think we should make it much harder to get antibiotics." (physician)

15  
16  
17  
18 Frequently used abbreviations:  
19

20 LMIC: low and middle income countries  
21

22 ASP: antibiotic stewardship program  
23

24 AS: antibiotic stewardship  
25

26 SEIPS: Systems Engineering Initiative for Patient Safety  
27

28 EMR: electronic medical record  
29  
30  
31  
32  
33  
34  
35  
36  
37  
38  
39  
40  
41  
42  
43  
44  
45  
46  
47  
48  
49  
50  
51  
52  
53  
54  
55  
56  
57  
58  
59  
60

## Appendix A: Antibiotic Stewardship Interview Questions

Interviewer: Antibiotic stewardship refers to the judicious use of antibiotics, and is a critical component of reducing antibiotic resistance. Components of antibiotic stewardship involve drug expertise, evaluating ongoing antibiotic treatment, monitoring prescribing practices, and reporting information on antibiotic use and resistance.

Your responses will be recorded with a voice recorder and transcribed, but the responses will be de-identified in any data set and your identity will be kept confidential.

### *Person*

1. How do you define antibiotic stewardship?
2. What do you think of antibiotic stewardship as an infectious disease prevention strategy?
3. Describe your level of interaction working with infectious disease specialists at your hospital.
4. Physician/Nurse
  - a. Describe your work with pharmacists in your hospital.
    - i. If poor availability/they don't work with pharmacists: What factors limit their availability to you?
    - ii. How do you work with pharmacists on specific patients?
    - iii. In an ideal situation, what would be different about how you work with the pharmacists?
  - b. Tell me about your workload.
    - i. How does your workload impact your ability to complete your job responsibilities?
5. All clinicians: Describe employee turnover on your ward

### *Organization*

1. Describe your experience regarding antimicrobial stewardship education in your facility.
  - a. What is your view of these trainings (how likely are you to attend? Do you apply the information to your practice? Who attends?)?
2. What do you hear about antimicrobial stewardship at work?
3. Describe a time a new policy was implemented on your ward/in your lab.
  - a. What challenges were encountered? What went well? How did this compare to other times when new policies were implemented?
  - b. How were staff involved in the development of the new policy? How are they typically involved in policy development?
4. Tell me about your interactions with people involved in the antibiotic stewardship program.
  - a. What types of things do you collaborate on/communicate about?
  - b. How could your interactions be improved?
5. What is your sense of how hospital leaders/management are involved in antibiotic stewardship efforts in your ward/lab?

6. All clinicians: How could antibiotic prescribing be improved in your facility? Tell me about empiric prescribing at your hospital. What factors should be considered when prescribing an antibiotic if the cause of illness is not yet known?

### *Tasks*

1. Lab Staff
  - a. Describe how you create an antibiogram.
    - i. How does creating an antibiogram fit in with your other job responsibilities?
    - ii. How often do you update the antibiogram?
    - iii. What is the scope of the antibiogram?
2. Nurses
  - a. What antibiotic stewardship practices are you responsible for on your ward?
  - b. How often do you review medications? Describe your review process.
  - c. What do you do when antibiotic usage seems questionable? Do you or your team decide together?
  - d. Are routine audits of antibiotic use conducted on your ward?
3. Pharmacists
  - a. What is your process when an antibiotic is ordered?
    - i. What are your selection review practices? Describe your collaboration with physicians.
    - ii. Describe your antibiogram use, including successes and challenges. How frequently is it updated?
4. Physicians
  - a. Describe your antibiotic selection process, including any guidelines you may use in making your decision.
    - i. Describe your antibiogram use, including successes and challenges. How frequently is it updated?
    - ii. How often are those guidelines adhered to in your workplace? If infrequently, what are the barriers to adherence?
  - b. Describe your review of antibiotic selection, including after the drug has been prescribed and after you have obtained culture results.
5. All clinicians: Where do you store information on antibiotic use (dosage, duration, indication)?
6. All clinicians: How often/how many cases of treatment failure related to resistance have you seen?
7. All staff: Evaluate the effect of your workload on your ability to implement antibiotic stewardship activities.
8. Describe what (if any) antibiotic resistance has had on your practice.
9. Describe what (if any) antibiotic resistance has had on your community.
10. What do you think would be the most useful strategies to help decrease antibiotic use?

### *Tools and Technology*

1. All clinicians: How do you determine a patient's antibiotic use status?



- 1
- 2
- 3 a. What resources or tools do you use to decide which antibiotic is most appropriate
- 4 for a patient?
- 5
- 6 2. Physicians and maybe pharmacists:
- 7 a. How does the lab impact your antibiotic prescribing?
- 8
- 9 3. Lab staff: What changes could be made to your lab that would help you to more
- 10 effectively support antibiotic prescribing/stewardship at your hospital?

### 11 *Environment*

12

13 What posters, signs, or other visual cues promoting good antibiotic prescribing are

14 present in your hospital? Where are they located? Which ones do you notice most?

15

16

17 Final: Is there anything I haven't asked you about antibiotic stewardship that you think is

18 important for me to know?

19

20

21

22

23

24

25

26

27

28

29

30

31

32

33

34

35

36

37

38

39

40

41

42

43

44

45

46

47

48

49

50

51

52

53

54

55

56

57

58

59

60

# Reporting checklist for qualitative study.

Based on the SRQR guidelines.

## Instructions to authors

Complete this checklist by entering the page numbers from your manuscript where readers will find each of the items listed below.

Your article may not currently address all the items on the checklist. Please modify your text to include the missing information. If you are certain that an item does not apply, please write "n/a" and provide a short explanation.

Upload your completed checklist as an extra file when you submit to a journal.

In your methods section, say that you used the SRQR reporting guidelines, and cite them as:

O'Brien BC, Harris IB, Beckman TJ, Reed DA, Cook DA. Standards for reporting qualitative research: a synthesis of recommendations. *Acad Med.* 2014;89(9):1245-1251.

|                                            | Reporting Item                                                                                                                                                                                                                                          | Page Number |
|--------------------------------------------|---------------------------------------------------------------------------------------------------------------------------------------------------------------------------------------------------------------------------------------------------------|-------------|
|                                            | <a href="#">#1</a> Concise description of the nature and topic of the study identifying the study as qualitative or indicating the approach (e.g. ethnography, grounded theory) or data collection methods (e.g. interview, focus group) is recommended | 5           |
|                                            | <a href="#">#2</a> Summary of the key elements of the study using the abstract format of the intended publication; typically includes background, purpose, methods, results and conclusions                                                             | 2           |
| Problem formulation                        | <a href="#">#3</a> Description and significance of the problem / phenomenon studied: review of relevant theory and empirical work; problem statement                                                                                                    | 3           |
| Purpose or research question               | <a href="#">#4</a> Purpose of the study and specific objectives or questions                                                                                                                                                                            | 2           |
| Qualitative approach and research paradigm | <a href="#">#5</a> Qualitative approach (e.g. ethnography, grounded theory, case study, phenomenology, narrative research) and guiding theory if appropriate; identifying the                                                                           | 5           |

research paradigm (e.g. postpositivist, constructivist / interpretivist) is also recommended; rationale. The rationale should briefly discuss the justification for choosing that theory, approach, method or technique rather than other options available; the assumptions and limitations implicit in those choices and how those choices influence study conclusions and transferability. As appropriate the rationale for several items might be discussed together.

|    |                     |                                                           |                 |
|----|---------------------|-----------------------------------------------------------|-----------------|
| 1  |                     |                                                           |                 |
| 2  |                     |                                                           |                 |
| 3  |                     |                                                           |                 |
| 4  |                     |                                                           |                 |
| 5  |                     |                                                           |                 |
| 6  |                     |                                                           |                 |
| 7  |                     |                                                           |                 |
| 8  |                     |                                                           |                 |
| 9  |                     |                                                           |                 |
| 10 |                     |                                                           |                 |
| 11 |                     |                                                           |                 |
| 12 |                     |                                                           |                 |
| 13 |                     |                                                           |                 |
| 14 | Researcher          | <a href="#">#6</a>                                        |                 |
| 15 | characteristics and | Researchers' characteristics that may influence the       | n/a. The team   |
| 16 | reflexivity         | research, including personal attributes, qualifications / | did not feel    |
| 17 |                     | experience, relationship with participants, assumptions   | any             |
| 18 |                     | and / or presuppositions; potential or actual interaction | characteristics |
| 19 |                     | between researchers' characteristics and the research     | dramatically    |
| 20 |                     | questions, approach, methods, results and / or            | influenced our  |
| 21 |                     | transferability                                           | devising of     |
| 22 |                     |                                                           | the interview   |
| 23 |                     |                                                           | guide or the    |
| 24 |                     |                                                           | data            |
| 25 |                     |                                                           | collection.     |
| 26 |                     |                                                           |                 |
| 27 |                     |                                                           |                 |
| 28 |                     |                                                           |                 |
| 29 |                     |                                                           |                 |
| 30 |                     |                                                           |                 |
| 31 | Context             | <a href="#">#7</a>                                        | 4               |
| 32 |                     | Setting / site and salient contextual factors; rationale  |                 |
| 33 |                     |                                                           |                 |
| 34 | Sampling strategy   | <a href="#">#8</a>                                        | 5               |
| 35 |                     | How and why research participants, documents, or          |                 |
| 36 |                     | events were selected; criteria for deciding when no       |                 |
| 37 |                     | further sampling was necessary (e.g. sampling             |                 |
| 38 |                     | saturation); rationale                                    |                 |
| 39 |                     |                                                           |                 |
| 40 |                     |                                                           |                 |
| 41 | Ethical issues      | <a href="#">#9</a>                                        | 6               |
| 42 | pertaining to human | Documentation of approval by an appropriate ethics        |                 |
| 43 | subjects            | review board and participant consent, or explanation      |                 |
| 44 |                     | for lack thereof; other confidentiality and data security |                 |
| 45 |                     | issues                                                    |                 |
| 46 |                     |                                                           |                 |
| 47 | Data collection     | <a href="#">#10</a>                                       | 5               |
| 48 | methods             | Types of data collected; details of data collection       |                 |
| 49 |                     | procedures including (as appropriate) start and stop      |                 |
| 50 |                     | dates of data collection and analysis, iterative process, |                 |
| 51 |                     | triangulation of sources / methods, and modification of   |                 |
| 52 |                     | procedures in response to evolving study findings;        |                 |
| 53 |                     | rationale                                                 |                 |
| 54 |                     |                                                           |                 |
| 55 |                     |                                                           |                 |
| 56 |                     |                                                           |                 |
| 57 | Data collection     | <a href="#">#11</a>                                       | Appendix 1      |
| 58 |                     | Description of instruments (e.g. interview guides,        |                 |
| 59 |                     |                                                           |                 |
| 60 |                     |                                                           |                 |

|                                                          |                                                                                              |                                                                                                                                                                                                                                                                                                                              |       |
|----------------------------------------------------------|----------------------------------------------------------------------------------------------|------------------------------------------------------------------------------------------------------------------------------------------------------------------------------------------------------------------------------------------------------------------------------------------------------------------------------|-------|
| 1<br>2<br>3<br>4                                         | instruments and technologies                                                                 | questionnaires) and devices (e.g. audio recorders) used for data collection; if / how the instruments(s) changed over the course of the study                                                                                                                                                                                |       |
| 5<br>6<br>7<br>8<br>9                                    | Units of study                                                                               | <a href="#">#12</a> Number and relevant characteristics of participants, documents, or events included in the study; level of participation (could be reported in results)                                                                                                                                                   | 5     |
| 10<br>11<br>12<br>13<br>14<br>15<br>16<br>17<br>18       | Data processing                                                                              | <a href="#">#13</a> Methods for processing data prior to and during analysis, including transcription, data entry, data management and security, verification of data integrity, data coding, and anonymisation / deidentification of excerpts                                                                               | 6     |
| 19<br>20<br>21<br>22<br>23<br>24<br>25                   | Data analysis                                                                                | <a href="#">#14</a> Process by which inferences, themes, etc. were identified and developed, including the researchers involved in data analysis; usually references a specific paradigm or approach; rationale                                                                                                              | 6     |
| 26<br>27<br>28<br>29<br>30                               | Techniques to enhance trustworthiness                                                        | <a href="#">#15</a> Techniques to enhance trustworthiness and credibility of data analysis (e.g. member checking, audit trail, triangulation); rationale                                                                                                                                                                     | 6     |
| 31<br>32<br>33<br>34<br>35                               | Syntheses and interpretation                                                                 | <a href="#">#16</a> Main findings (e.g. interpretations, inferences, and themes); might include development of a theory or model, or integration with prior research or theory                                                                                                                                               | 6     |
| 36<br>37<br>38<br>39                                     | Links to empirical data                                                                      | <a href="#">#17</a> Evidence (e.g. quotes, field notes, text excerpts, photographs) to substantiate analytic findings                                                                                                                                                                                                        | 18-22 |
| 40<br>41<br>42<br>43<br>44<br>45<br>46<br>47<br>48<br>49 | Intergration with prior work, implications, transferability and contribution(s) to the field | <a href="#">#18</a> Short summary of main findings; explanation of how findings and conclusions connect to, support, elaborate on, or challenge conclusions of earlier scholarship; discussion of scope of application / generalizability; identification of unique contributions(s) to scholarship in a discipline or field | 12    |
| 50<br>51                                                 | Limitations                                                                                  | <a href="#">#19</a> Trustworthiness and limitations of findings                                                                                                                                                                                                                                                              | 12    |
| 52<br>53<br>54<br>55<br>56<br>57                         | Conflicts of interest                                                                        | <a href="#">#20</a> Potential sources of influence of perceived influence on study conduct and conclusions; how these were managed                                                                                                                                                                                           | 1     |
| 58<br>59<br>60                                           | Funding                                                                                      | <a href="#">#21</a> Sources of funding and other support; role of funders                                                                                                                                                                                                                                                    | 1     |

in data collection, interpretation and reporting

The SRQR checklist is distributed with permission of Wolters Kluwer © 2014 by the Association of American Medical Colleges. This checklist can be completed online using <https://www.goodreports.org/>, a tool made by the [EQUATOR Network](#) in collaboration with [Penelope.ai](#)

For peer review only

# BMJ Open

## Evaluating Antibiotic Stewardship by Interviewing Tertiary Care Hospital Staff in Kerala, India

|                                 |                                                                                                                                                                                                                                                                                                                                                                                                                                                                                                                                                                                                                                                                                                                                                                  |
|---------------------------------|------------------------------------------------------------------------------------------------------------------------------------------------------------------------------------------------------------------------------------------------------------------------------------------------------------------------------------------------------------------------------------------------------------------------------------------------------------------------------------------------------------------------------------------------------------------------------------------------------------------------------------------------------------------------------------------------------------------------------------------------------------------|
| Journal:                        | <i>BMJ Open</i>                                                                                                                                                                                                                                                                                                                                                                                                                                                                                                                                                                                                                                                                                                                                                  |
| Manuscript ID                   | bmjopen-2018-026193.R2                                                                                                                                                                                                                                                                                                                                                                                                                                                                                                                                                                                                                                                                                                                                           |
| Article Type:                   | Research                                                                                                                                                                                                                                                                                                                                                                                                                                                                                                                                                                                                                                                                                                                                                         |
| Date Submitted by the Author:   | 08-Mar-2019                                                                                                                                                                                                                                                                                                                                                                                                                                                                                                                                                                                                                                                                                                                                                      |
| Complete List of Authors:       | Baubie, Kelsey; University of Wisconsin Madison, Infectious Disease<br>Shaughnessy, Catherine; University of Wisconsin Madison, Infectious Disease<br>Kostiuk, Lia; University of Wisconsin Madison<br>Joseph, Mariam; Amrita Institute of Medical Sciences and Research Centre, Pharmacy<br>Safdar, Nasia ; University of Wisconsin Madison, Infectious Disease;<br>William S. Middleton Memorial Veterans Hospital, Research<br>Singh, Sanjeev; Amrita Institute of Medical Sciences and Research Centre, Hospital Administration<br>Siraj, Dawd; University of Wisconsin Madison, Infectious Disease<br>Sethi, Ajay; University of Wisconsin Madison, Population Health Sciences<br>Keating, Julie; William S. Middleton Memorial Veterans Hospital, Research |
| <b>Primary Subject Heading</b>: | Global health                                                                                                                                                                                                                                                                                                                                                                                                                                                                                                                                                                                                                                                                                                                                                    |
| Secondary Subject Heading:      | Infectious diseases                                                                                                                                                                                                                                                                                                                                                                                                                                                                                                                                                                                                                                                                                                                                              |
| Keywords:                       | PUBLIC HEALTH, QUALITATIVE RESEARCH, INFECTIOUS DISEASES                                                                                                                                                                                                                                                                                                                                                                                                                                                                                                                                                                                                                                                                                                         |
|                                 |                                                                                                                                                                                                                                                                                                                                                                                                                                                                                                                                                                                                                                                                                                                                                                  |

SCHOLARONE™  
Manuscripts

1  
2  
3 Evaluating Antibiotic Stewardship by Interviewing Tertiary Care Hospital Staff in Kerala,  
4 India  
5  
6

7 Kelsey Baubie, MS, MPH\*<sup>1</sup>, Catherine Shaughnessy, BS\*<sup>1</sup>, Lia Kostiuk, MD<sup>1</sup>, Mariam Varsha  
8 Joseph, PharmD<sup>2</sup>, Nasia Safdar MD, PhD<sup>1,4</sup>, Sanjeev Singh, MBBS, PhD, MPhil, DCH<sup>3</sup>, Dawd  
9 Siraj, MD, MPH<sup>1</sup>, Ajay Sethi, PhD<sup>5</sup>, Julie Keating, PhD<sup>4</sup>

10 \*denotes equal contribution  
11  
12  
13

14 1. Department of Infectious Disease, University of Wisconsin Madison School of Medicine  
15 and Public Health, Madison, Wisconsin, USA  
16

17 2. Department of Pharmacy, Amrita Institute of Medical Sciences and Research Centre,  
18 Cochin, Kerala, India

19 3. Department of Hospital Administration, Amrita Institute of Medical Sciences and  
20 Research Centre, Cochin, Kerala, India  
21

22 4. Department of Research, William S. Middleton Memorial Veterans Administration  
23 Hospital, Madison, Wisconsin, USA  
24

25 5. Department of Population Health Sciences, University of Wisconsin Madison School of  
26 Medicine and Public Health, Madison, Wisconsin, USA  
27  
28

29 Corresponding author:

30 Kelsey Baubie, Clinical Science Center, 600 Highland Ave Madison WI 53792

31 Phone: 608-262-9223

32 Email: baubie@wisc.edu  
33  
34  
35

36 Email addresses for other authors: Catherine Shaughnessy, cessaugh@medicine.wisc.edu

37 Lia Kostiuk, lkostiuk@wisc.edu

38 Mariam Varsha Joseph, mariamvj@aims.amrita.edu

39 Nasia Safdar, ns2@medicine.wisc.edu

40 Sanjeev Singh, sanjeevksingh@aims.amrita.edu

41 Dawd Siraj, dssiraj@medicine.wisc.edu

42 Ajay Sethi, aksethi@wisc.edu

43 Julie Keating, jakeating@medicine.wisc.edu  
44  
45  
46  
47

48 Word count of manuscript body: 2951  
49

50 Contributorship Statement: KB and CS created the interview guides, wrote the manuscript,  
51 and conducted on-site data collection. LK assisted with on-site data collection, writing and  
52 editing of the manuscript. MVJ assisted with on-site data collection and editing of the  
53 manuscript. NS and SS edited the manuscript and devised the project. DS assisted with  
54  
55  
56  
57  
58  
59  
60

1  
2  
3 writing and editing the manuscript. AS helped with the grant and edited the manuscript. JK  
4 edited the manuscript.  
5

6  
7 Data sharing statement: Individual interview transcripts are available upon request to the  
8 corresponding author.  
9

10 Funding: This project was funded by the University of Wisconsin Global Health Institute.

11 Conflict of interests: None of the authors report any conflict of interests.  
12  
13  
14  
15  
16  
17

## 18 Abstract

19  
20 Objectives: To determine what barriers and facilitators to antibiotic stewardship exist within  
21 a healthcare facility.  
22

23  
24 Setting: 1300 bed tertiary care private hospital located in the state of Kerala, India.  
25

26 Participants: 31 semi-structured interviews and 4 focus groups with hospital staff ranging  
27 from physicians, nurses, pharmacists, and a clinical microbiologist.  
28

29  
30 Results: Key facilitators of antibiotic stewardship (AS) at the hospital included a dedicated  
31 committee overseeing appropriate inpatient antibiotic use, a prompt microbiology lab, a  
32 high level of AS understanding among staff, established guidelines for empiric prescribing,  
33 and an easily-accessible antibiogram. We identified the following barriers: limited access to  
34 clinical pharmacists, physician immunity to change regarding stewardship policies,  
35 infrequent antibiotic de-escalation, high physician workload, an incomplete electronic  
36 medical record (EMR), inadequate antibiotic stewardship program (ASP) physical visibility,  
37 and high antibiotic use in the community.  
38

39  
40 Conclusions: Opportunities for improvement at this institution include increasing  
41 accessibility to clinical pharmacists, implementing strategies to overcome physician  
42 immunity to change, and establishing a more accessible and complete EMR. Our findings are  
43 likely to be of use to institutions developing ASPs in lower resource settings.  
44  
45

46 Keywords: Antibiotic stewardship, antibiotic stewardship programs, antibiotic resistance,  
47 India, SEIPS  
48  
49  
50  
51  
52  
53  
54  
55  
56  
57  
58  
59



### Strengths and limitations of this study

- Our study is the first of its kind to systematically examine the key barriers and facilitators of implementing an ASP in a low/middle-income country (LMIC).
- We interviewed a variety of healthcare workers: physicians, nurses, clinical pharmacists, and a microbiologist.
- This was a single center study. Thus, transferability of our findings to more resource-limited rural hospitals within India or to other LMIC may not be possible.
- We did not conduct direct observations of practice to correlate with self-reporting.

### Background

The United Nations declared antimicrobial resistance to be “the greatest and most urgent global risk” in 2016<sup>1</sup>. Antibiotic overuse and misuse drives antimicrobial resistance<sup>2</sup>. In India, rates of infections caused by antibiotic resistant bacteria are high and increasing<sup>3-11</sup>. Given that the main driver of antibiotic resistance is antibiotic use and misuse, antibiotic stewardship (AS) and antibiotic stewardship programs (ASP) have a critical role in promoting judicious antibiotic use<sup>12</sup>.

In a recent review of AS studies spanning every continent, Davey et al. found ASPs were effective in decreasing treatment duration and increasing adherence to antibiotic use policy<sup>13</sup>. While the evidence for ASP effectiveness is growing, there is considerable variation among ASPs in size, activities, and scope. Newly published consensus of an ASP core elements checklist includes experts from twelve countries on six continents and should be considered by healthcare centers when considering their individual ASP, no matter their economic status<sup>14</sup>. This checklist includes some of the elements we identified as areas of strength in this institution: senior hospital management support, a formal ASP, and timely access to laboratory results. Still, we recognize low and middle income countries (LMIC) face

1  
2  
3 ASP implementation challenges including limited diagnostic lab capability, inadequate  
4 awareness, limited access to quality antibiotics, and high patient census<sup>15</sup>. To date, few  
5 studies have explored the challenges facilities in India face carrying out ASPs, such as less  
6 available manpower and money dedicated to maintaining a detailed electronic medical  
7 record (EMR) compared to higher income country counterparts<sup>16-18</sup>. EMR systems have been  
8 found to be one of the most effective ways of keeping records on patient care and allow for  
9 easier discussion and feedback on antibiotic choices<sup>17</sup>. We selected India because, as  
10 mentioned, antibiotic resistance rates are high and increasing, and our study facility had  
11 recently implemented an ASP to address this issue. Thus, we undertook a prospective  
12 qualitative study in Kerala, India to examine the barriers and facilitators to practicing AS in  
13 a LMIC healthcare setting and to identify opportunities to improve AS.  
14  
15  
16  
17  
18  
19  
20  
21  
22  
23  
24  
25  
26  
27

## 28 29 Methods

### 30 31 *Location*

32  
33 In January 2018, we conducted a qualitative study to understand the barriers and  
34 facilitators to AS at a 1300 bed tertiary care private hospital located in the state of Kerala,  
35 India. This urban hospital, which includes 275 intensive care beds, provides free or  
36 subsidized advanced care for two-thirds of its patient population. AS activities began in  
37 2015. The hospital's ASP, members of which include internists, surgeons, a microbiologist,  
38 critical care physicians, infection control nurses, and an administrator, began in 2016. The  
39 Chief Medical Officer, the head of both the institution as a whole and the ASP itself, initiated  
40 the antibiotic stewardship meetings, infectious disease rounds, chart review of patients.  
41 Committee members are a mix of junior, mid-level, and senior staff and serve for at least two  
42 years with the option to continue involvement afterward.  
43  
44  
45  
46  
47  
48  
49  
50  
51  
52  
53  
54  
55  
56  
57  
58  
59  
60

### *Study population*

Physicians, nurses, clinical pharmacists, and a microbiologist were identified by the on-site study team by emailing information to staff regarding the project and subsequently approached staff in-person to identify interested participants. We included senior faculty and healthcare professionals working on the critical care medicine and infectious disease teams for interview. Exclusion criteria included non-English speaking staff and staff who were subordinates to any member of the study team.

### *Data collection*

We conducted 31 semi-structured interviews and 4 focus groups with hospital staff involved in AS. Interview guides were developed based on the Systems Engineering Initiative for Patient Safety (SEIPS) framework. This framework evaluates the interactions between the people, organization, tasks, tools/technology, and environment of a given work system, allowing for identification of key areas for improvement or intervention<sup>19</sup>. Interviews were conducted in private rooms at the hospital, and were audio recorded after obtaining verbal consent from the participant. No personal information was recorded, and each interview lasted between 10 and 30 minutes. The interview guides used have been included for reference (Appendix A).

### *Analysis*

All interviews were transcribed and analyzed deductively using the SEIPS framework. One member from the study team manually coded the interview transcripts. Quotations from transcribed interviews were sorted into the SEIPS categories of person, organization, tasks, tools/technology, and physical environment. After all study team members agreed on the identified themes from the interviews, the most prominent barriers and facilitators to AS

1  
2  
3 were identified in each category based on number of participant responses. We used the  
4  
5 Standards for Reporting Qualitative Research (SRQR) guidelines<sup>20</sup>.  
6

### 7 8 *Ethics approval*

9  
10 The Institutional Review Board at the University of Wisconsin-Madison granted this  
11  
12 study exemption from full review. The Internal Ethics Committee at the participating  
13  
14 hospital reviewed the study and granted approval (IRB# 2017-1268).  
15  
16

### 17 18 *Patient and Public Involvement statement*

19  
20 The development of our study was informed by many patients' preference to get  
21  
22 antibiotics right away, just in case these drugs help. This can influence how healthcare  
23  
24 providers deal with prescribing. We did not involve patients with the design or conduct of  
25  
26 the study. Results will be disseminated to the involved healthcare workers at staff meetings  
27  
28 and electronic communications.  
29  
30

### 31 32 **Results**

33  
34 In total, we interviewed 45 hospital faculty and staff. Participants included individual  
35  
36 interviews with physicians (27), clinical pharmacists (3), and one microbiologist. We also  
37  
38 conducted four focus groups consisting of ASP team members, pharmacists (two groups),  
39  
40 and infection control nurses with two to five participants each.  
41  
42

### 43 44 *Organization*

45  
46 The hospital's ASP is the key organizational component of promoting judicious  
47  
48 antibiotic use and is in addition to the three clinical pharmacists and one infection control  
49  
50 nurse the hospital uses as dedicated, full-time stewardship positions. The ASP team  
51  
52 evaluates the list of inpatients receiving antibiotics to evaluate "The Five R's" of antibiotic  
53  
54 prescribing: right drug, right dose, right frequency, right duration, and right indication. When  
55  
56  
57  
58  
59  
60

1  
2  
3 the team identifies opportunities for antibiotic de-escalation or reduced duration, a clinical  
4 pharmacist member contacts the prescribing physician to issue treatment  
5 recommendations, and the prescribing physician decides whether to modify treatment.  
6  
7 Typically the hospital sees 30 “higher antibiotic” prescriptions a day; these are the cases the  
8 ASP reviews. Usually the committee has suggestions for five or six cases, most often  
9  
10 communicating these with staff via email for recording/tracking purposes. In-person  
11 communication during rounds, telephone calls, and text messages to the microbiologists in  
12 the lab are also utilized as they are more effective methods of quick communication.  
13  
14

15  
16 According to about half of respondents, hospital administrative leadership  
17 champions the ASP by being involved in the meetings, handling difficult conversations with  
18 physicians, and instilling confidence in all staff that the ASP is working with them to improve  
19 patient care. Staff in turn view their institution’s ASP as a key facilitator of AS at the hospital  
20 (Table 1, quotes 1-3). In addition to the ASP itself, 17 interviewees regarded the  
21 microbiology lab as a key facilitator of AS. Staff praised the 24-hour lab’s promptness and  
22 the rapidity with which lab staff uploaded results into the EMR. In addition, many physicians  
23 relied on the microbiologist’s expertise for help identifying microorganisms in complicated  
24 infections (Table 1, quotes 4 and 5). As one physician said, “If we are thinking about a gram  
25 positive illness and we get a culture that’s gram negative, which is grown very quickly, we  
26 totally change our report.”  
27  
28

29  
30 Despite having an effective stewardship program and lab, 16 interviewees identified  
31 limited clinical pharmacist availability as a barrier to AS. In India, clinical pharmacists must  
32 complete a six year Doctorate program from an accredited university to receive licensure,  
33 and many physicians recognized clinical pharmacists’ knowledge as a critical component of  
34  
35  
36  
37  
38  
39  
40  
41  
42  
43  
44  
45  
46  
47  
48  
49  
50  
51  
52  
53  
54  
55  
56  
57  
58  
59  
60

1  
2  
3 patient care. However, several departments had one clinical pharmacist and many had none  
4  
5 at all. Staff worried this lack of pharmacist access may cause clinicians to miss drug  
6  
7 interactions or prescribe antibiotics at incorrect dosages (Table 1, quotes 6-8).  
8  
9

### 10 *Person*

11  
12 During our interviews, staff identified AS activities, such as using the correct  
13  
14 antibiotic at the correct dose, as a key component of reducing antibiotic resistance. In  
15  
16 addition, staff mentioned they often heard about AS at work. This high level of awareness  
17  
18 among staff facilitates AS practices (Table 1, quotes 9-11).  
19  
20  
21

22 While most interviewed staff demonstrated AS policy understanding, they revealed  
23  
24 many physicians resisted accepting suggestions from the ASP. Moreover, several physicians  
25  
26 and pharmacists worried other physicians did not acknowledge pharmacists' contributions  
27  
28 to patient care. According to nine interviewees, this immunity to change may impede AS  
29  
30 practices and contribute to antibiotic resistance through incorrect antibiotic dosing and  
31  
32 duration (Table 1, quotes 12 and 13). One clinician described this phenomena for us by  
33  
34 saying, "I think clinicians are empowered to think that they know best. They need to  
35  
36 recognize the roles of the microbiologists and the pharmacists and should not feel low that  
37  
38 they have asked for help." A nurse we spoke to distilled the issue; "Challenges come from  
39  
40 navigating human behavior." Staff immunity to change may present challenges for other  
41  
42 LMIC as well; strategies which have been helping this particular facility are publishing easily  
43  
44 accessible guidelines and committing to persistent interaction between staff and the ASP. In  
45  
46 this way, AS is a priority which is tended to and fostered as an institution-wide value.  
47  
48  
49  
50  
51

### 52 *Tasks*

1  
2  
3 Staff in 12 interviews felt that clinicians follow established guidelines when  
4 prescribing antibiotics when the cause of illness is not yet known. Following a clinical  
5 evaluation, the physician orders a culture and initiates a broad-spectrum antibiotic.  
6  
7 Physicians then use this culture result to modify the original antibiotic used. This process,  
8 often called de-escalation, involves selecting an antibiotic which has a more specific  
9 spectrum or stopping antibiotic treatment if the cultures do not identify a bacterial infection  
10 (Table 1, quote 14).  
11  
12  
13  
14  
15  
16  
17  
18

19 As a tertiary care facility, this hospital frequently treats high-risk patients who have  
20 acquired resistant infections in the community or at other hospitals. Therefore, physicians  
21 at our study institution often feel compelled to empirically prescribe broad-spectrum  
22 antibiotics while awaiting culture results. However, physicians often forget or refuse to de-  
23 escalate antibiotic use due to workload or fear of losing the patient. In our study, physicians  
24 and pharmacists in eight interviews worried this lack of de-escalation may increase the risk  
25 of antibiotic resistant infections (Table 1, quote 15) and cited de-escalation as the most  
26 important issue regarding antibiotic prescribing. Similarly, nine interviewed staff members  
27 feared their high workloads may negatively impact their ability to always judiciously  
28 prescribe antibiotics. Physicians noted they are often unable to spend sufficient time  
29 evaluating a patient and this, along with uncertainty over what exact drugs the patient has  
30 already taken pre-admission, leads to antibiotic over-prescription (Table 1, quotes 16 and  
31 17). This happens because if a patient has already taken a certain class of antibiotic and they  
32 haven't worked, prescribing more is not going to help.  
33  
34  
35  
36  
37  
38  
39  
40  
41  
42  
43  
44  
45  
46  
47  
48  
49  
50

### 51 *Tools/Technology*

52  
53  
54  
55  
56  
57  
58  
59  
60

1  
2  
3 The hospital microbiologist and clinical pharmacists update the hospital antibiogram  
4 annually. The antibiogram, which gives the percent of pathogens susceptible to various  
5 antimicrobial agents, is accessible on the hospital intranet and divided into Gram positive,  
6 Gram negative, and yeast. In 17 interviews, staff members identified this user-friendly tool  
7 as a key facilitator in selecting antibiotics based on hospital resistance patterns, a critical  
8 component of AS (Table 1, quote 18).  
9

10  
11  
12 In addition to the antibiogram, this hospital also utilizes an EMR, which to save money  
13 is built and maintained by the hospital's Information Technology department. The EMR is  
14 used to store information on inpatients, a useful addition for identifying immediate drug  
15 interactions and thereby reducing harm. However, the EMR does not contain a patient's full  
16 scope of antibiotic use, including antibiotic history, duration, and dose. This incompleteness  
17 often forces physicians and pharmacists to refer to a patient's paper health record, which  
18 one pharmacist described as a "tedious" process (Table 1, quote 19). Moreover, physician  
19 workflow does not include entering antibiotic data into the EMR. Due to high work volume,  
20 physicians depend on the ward secretary, nursing assistants, or research assistants to  
21 update the EMR. As one physician explained, "I see 80 patients a day. So it's not possible for  
22 me to spend so much time logging in, recording all this. I don't think it's possible unless I had  
23 someone sitting next to me doing just that." (Table 1, quote 20). A dozen interviewed staff  
24 members identified this inability to quickly access the full scope of a patient's antibiotic  
25 history as a barrier to judiciously prescribing antibiotics.  
26  
27  
28  
29  
30  
31  
32  
33  
34  
35  
36  
37  
38  
39  
40  
41  
42  
43  
44  
45  
46  
47  
48

### 49 *Environment*

50  
51  
52 Despite having a highly engaged AS team, staff mentioned the hospital did not have  
53 signs or posters to increase stewardship awareness, which several staff identified as a  
54  
55  
56  
57  
58  
59  
60



1  
2  
3 potentially useful addition. A few interviewees thought AS policies were sometimes printed  
4 and posted but did not “stand out.” These printed antibiotic prescribing protocols were not  
5  
6 visible to all staff, and 23 interviewed staff members mentioned this limited visibility may  
7  
8 inhibit widespread AS awareness. (Table 1, quotes 21 and 22)  
9  
10

11  
12 In addition, staff identified high local antibiotic use as a barrier to stewardship. As  
13  
14 patients can purchase antibiotics over the counter or have been recently hospitalized at  
15  
16 another facility, many patients enter the hospital already using antibiotics. These high use  
17  
18 rates often lead to antibiotic resistant infections in the community, forcing physicians to  
19  
20 prescribe broad-spectrum antibiotics. Furthermore, several staff feared the impact of high  
21  
22 antibiotic use in animal husbandry and fisheries on spreading resistance. Seven staff  
23  
24 members wished for enhanced antibiotic prescribing regulations and more AS awareness in  
25  
26 greater India (Table 1, quote 23).  
27  
28  
29  
30

### 31 **Discussion**

32  
33 Our study is the first of its kind in the English language to systematically examine key  
34  
35 barriers and facilitators of implementing ASP in a LMIC tertiary hospital. Using the SEIPS  
36  
37 model, we examined the implementation of an ASP at a large tertiary care hospital in order  
38  
39 to identify opportunities to improve this program.  
40  
41  
42

43 We found that limited access to clinical pharmacists, physician immunity to change  
44  
45 resulting in infrequent antibiotic de-escalation, high physician workload, an inadequate  
46  
47 EMR, inadequate physical visibility of stewardship activities, and high antibiotic use in the  
48  
49 community were major barriers to effective ASP implementation. The presence of a prompt  
50  
51 microbiology laboratory, high level of understanding of AS among staff, easily accessible  
52  
53 antibiogram, and established guidelines for empiric prescribing were identified as important  
54  
55  
56  
57  
58  
59  
60

1  
2  
3 facilitators of an effective ASP in this hospital. As Ravi et al. (2017) discovered, we found  
4 committed leadership from the administrator was a major factor as well<sup>17</sup>. This could be a  
5 main driver of why AS understanding and opinions about the facility's AS efforts were fairly  
6 unified among interviewees regardless of if they were involved in the ASP team or not.  
7  
8  
9  
10  
11

12 Our study found limited access to pharmacists was a barrier for an effective ASP.  
13 Multidisciplinary rounds with guideline-based antibiotic recommendations for specific  
14 infections have been found to decrease use and duration of both broad spectrum and high-  
15 end, reserve antibiotics<sup>21</sup>. Clinical pharmacists can provide real-time decision support which  
16 could significantly improve rates of antibiotic tailoring to culture data<sup>22</sup>. Empowering clinical  
17 pharmacists to identify highly misused antibiotics, design guideline-based de-escalation  
18 protocols, and participate in multidisciplinary rounds may improve the quality of ASP.  
19  
20  
21  
22  
23  
24  
25  
26  
27  
28

29 Physician resistance to changes in antibiotic use practices was identified as a barrier  
30 to an effective ASP. Factors which influence physician antibiotic prescribing habits include  
31 anxiety about missing an infection and the antibiotic prescribing behavior of peers<sup>23</sup>. This is  
32 an important active area of research; interventions such as encouraging reflection on  
33 practice, the use of audit and feedback, small-group learning with discussions and  
34 engagement by senior clinicians, and deploying multidisciplinary teams including clinical  
35 pharmacists have been shown to improve prescriber behavior<sup>24,25</sup>. In LMIC settings, we  
36 recommend leadership should actively promote ASP activities and their value. Feedback on  
37 antibiotic usage and patterns should be disseminated to improve adherence to local or  
38 national guidelines at this facility.  
39  
40  
41  
42  
43  
44  
45  
46  
47  
48  
49  
50  
51

52 We found that the usability and accessibility of the EMR were another barrier to an  
53 effective ASP. Adoption of an EMR can improve ASP by providing a centralized location for  
54  
55  
56  
57  
58  
59  
60

1  
2  
3 microbiology results and other relevant clinical data<sup>26</sup>. However, the expense of acquiring  
4 and optimizing an EMR system to harness its full potential makes this intervention difficult  
5 to implement, particularly in LMIC settings<sup>27</sup>.  
6  
7  
8  
9

10 Our study identified high and indiscriminate community-based antibiotic use as one  
11 reason why AS is such a challenge at our study site. Variably-enforced regulations on  
12 antibiotic dispensing and the availability of antibiotics without a prescription is a  
13 widespread problem in many countries, including India<sup>28</sup>. The broad and unregulated use of  
14 antibiotics in animal feed and fisheries compounds this barrier<sup>29</sup>. ASP in healthcare settings  
15 can be complemented by AS in the community for all uses of antibiotics, with an inclusive  
16 “One Health” approach to addressing resistance<sup>30</sup>. While not mentioned by any staff,  
17 extensive pollution from pharmaceutical production has also been noted as a driver of  
18 resistant bacteria, and this too should be addressed in a One Health approach<sup>31</sup>. The state  
19 which our study institution exists, Kerala, is currently the only state in India to have an  
20 antibiotic policy. Efforts for federal antibiotic use regulations have some support, but  
21 nothing has yet come to fruition.  
22  
23  
24  
25  
26  
27  
28  
29  
30  
31  
32  
33  
34  
35  
36  
37

38 Our study has limitations. First, this was a single center study. Thus, transferability of  
39 our findings to more resource-limited rural hospitals within India or to other LMIC may not  
40 be possible. Second, we did not conduct direct observations of practice to correlate with self-  
41 reporting. Future studies may identify additional barriers and facilitators by implementing  
42 direct observation approaches to collect data on stewardship practices. We also asked staff  
43 members if they would like to be interviewed, thus introducing the possibility only those  
44 who were really invested in AS would agree.  
45  
46  
47  
48  
49  
50  
51  
52  
53  
54  
55  
56  
57  
58  
59  
60

## Conclusion

The use of the SEIPS model to analyze an ASP in an LMIC identified barriers and facilitators within the healthcare work system. Opportunities for improvement at this institution include increasing accessibility to clinical pharmacists, implementing strategies to overcome physician immunity to change, and establishing a more accessible and complete EMR. Interventions which account for and address barriers and strengthen facilitators should be tested in future studies for their effect on antimicrobial usage and resistance.

## Author Statement

KB created the interview guides, conducted in-person interviews, and wrote, edited, and prepared the manuscript. CS created the interview guides, conducted in-person interviews, and wrote/edited the manuscript. JK edited the manuscript. LK conducted on-site data collection and wrote/edited the manuscript. MVJ assisted with on-site data collection and edited the manuscript. SS devised the project and edited the manuscript. NS obtained funding, devised the project, and edited the manuscript. AS assisted with the grant and edited the manuscript. DS assisted with the grant and wrote/edited the manuscript.

## References

1. United Nations (2016). Political Declaration of the high-level meeting of the General Assembly on antimicrobial resistance. *Bulletin of the General Assembly, Seventy-First Session: Global health and foreign policy*. Available at: [https://digitallibrary.un.org/record/842813/files/A\\_71\\_L-2-EN.pdf](https://digitallibrary.un.org/record/842813/files/A_71_L-2-EN.pdf)
2. Organisation for Economic Co-operation and Development (2016). Antimicrobial resistance: policy insights. Available at: <https://www.oecd.org/health/health-systems/AMR-Policy-Insights-November2016.pdf>
3. Bammigatti, C., Doradla, S., Belgode, H. N., Kumar, H., & Swaminathan, R. P. (2017). Healthcare Associated Infections in a Resource Limited Setting. *Journal of Clinical and*

1  
2  
3                    *Diagnostic Research : JCDR*,                    11(1),                    OC01–OC04.  
4                    <http://doi.org/10.7860/JCDR/2017/23076.9150>  
5  
6

- 7                    4. Barker, A. K., Brown, K., Ahsan, M., Sengupta, S., & Safdar, N. (2017). Social  
8                    determinants of antibiotic misuse: a qualitative study of community members in  
9                    Haryana, India. *BMC Public Health*, 17, 333. [http://doi.org/10.1186/s12889-017-](http://doi.org/10.1186/s12889-017-4261-4)  
10                    4261-4  
11  
12                    5. Barker, A. K., Brown, K., Ahsan, M., Sengupta, S., & Safdar, N. (2017). What drives  
13                    inappropriate antibiotic dispensing? A mixed-methods study of pharmacy employee  
14                    perspectives in Haryana, India. *BMJ Open*, 7(3), e013190.  
15                    <http://doi.org/10.1136/bmjopen-2016-013190>  
16  
17  
18                    6. Gandra, S., Mojica, N., Klein, E. Y., Ashok, A., Nerurkar, V., Kumari, M., Ramesh, U.,  
19                    Sunanda, D., Vadwai, V., Das, B., Laxminarayan, R. (2016). Trends in antibiotic  
20                    resistance among major bacterial pathogens isolated from blood cultures tested at a  
21                    large private laboratory network in India, 2008–2014. *International Journal of*  
22                    *Infectious Diseases*, 50, 75–82. <http://doi.org/10.1016/j.ijid.2016.08.002>  
23  
24  
25                    7. Khety, Z., Mohanta, G., Jain, S., Dawoodi, S. (2017). Changing Antimicrobial Resistance  
26                    Pattern of Isolates from an ICU Over a 3 Year period. *Journal of the Association of*  
27                    *Physicians of India*. 65: 13-16. Available at:  
28                    [japi.org/february\\_2017/02\\_oa\\_changing\\_antimicrobial\\_resistance\\_pattern.pdf](http://japi.org/february_2017/02_oa_changing_antimicrobial_resistance_pattern.pdf)  
29  
30  
31                    8. Moolchandani, K., Sastry, A. S., Deepashree, R., Sistla, S., Harish, B., & Mandal, J. (2017).  
32                    Antimicrobial Resistance Surveillance among Intensive Care Units of a Tertiary Care  
33                    Hospital in Southern India. *Journal of Clinical and Diagnostic Research : JCDR*, 11(2),  
34                    DC01–DC07. <http://doi.org/10.7860/JCDR/2017/23717.9247>  
35  
36  
37                    9. Odsbu, I., Khedkar, S., Lind, F., Khedkar, U., Nerkar, S. S., Orsini, N., Tamhankar, A.J.,  
38                    Stålsby Lundborg, C. (2018). Trends in Resistance to Extended-Spectrum  
39                    Cephalosporins and Carbapenems among *Escherichia coli* and *Klebsiella* spp. Isolates  
40                    in a District in Western India during 2004–2014. *International Journal of*  
41                    *Environmental Research and Public Health*, 15(1), 155.  
42                    <http://doi.org/10.3390/ijerph15010155>  
43  
44  
45                    10. Satyanarayana, S., Kwan, A., Daniels, B., Subbaraman, R., McDowell, A., Bergkvist, S.,  
46                    Das, R.K., Das, V., Das, J., Pai, M. (2016). Use of standardised patients to assess  
47                    antibiotic dispensing for tuberculosis by pharmacies in urban India: a cross-sectional  
48                    study, *The Lancet Infectious Diseases*, 16(11): 1261-1268.  
49                    [https://doi.org/10.1016/S1473-3099\(16\)30215-8](https://doi.org/10.1016/S1473-3099(16)30215-8)  
50  
51  
52                    11. Sharma, M., Damlin, A., Pathak, A., Stålsby Lundborg, C. (2015). Antibiotic Prescribing  
53                    among Pediatric Inpatients with Potential Infections in Two Private Sector Hospitals  
54                    in Central India. *PLOS ONE* 10(11): e0142317.  
55                    <https://doi.org/10.1371/journal.pone.0142317>  
56  
57  
58  
59  
60

- 1  
2  
3  
4  
5  
6  
7  
8  
9  
10  
11  
12  
13  
14  
15  
16  
17  
18  
19  
20  
21  
22  
23  
24  
25  
26  
27  
28  
29  
30  
31  
32  
33  
34  
35  
36  
37  
38  
39  
40  
41  
42  
43  
44  
45  
46  
47  
48  
49  
50  
51  
52  
53  
54  
55  
56  
57  
58  
59  
60
12. Infectious Diseases Society of America (2018). Promoting Antimicrobial Stewardship in Human Medicine. Available at: [http://www.idsociety.org/Stewardship\\_Policy/](http://www.idsociety.org/Stewardship_Policy/)
  13. Davey, P., Marwick, C., Scott, C.L., Charani, E., McNeil, K., Brown, E., Gould, I.M., Ramsay, C.R., Michie, S. (2017) Interventions to improve antibiotic prescribing practices for hospital inpatients. *Cochrane Database Syst Rev.* 2017 Feb 9 (2). Doi: 10.1002/14651858.CD003543.pub4
  14. Pulcini, C., Binda, F., Lamkang, A.S., Trett, A., Charani, E., Goff, D.A., Harbarth, S., Hinrichsen, S.L., Levy-Hara, G., Mendelson, M., Nathwani, D., Gunturu, R., Singh, S., Srinivasan, A., Thamlikitkul, V., Thursky, K., Vlieghe, E., Wertheim, H., Zeng, M., Gandra, S., Laxminarayan, R. (2018). Developing core elements and checklist items for global hospital antimicrobial stewardship programmes: a consensus approach, *Clinical Microbiology and Infection* doi: 10.1016/j.cmi.2018.03.033.
  15. Cox J.A., Vlieghe E., Mendelson M., Wertheim H., Ndegwa L., Villegas M.V., Gould I., Levy Hara G. (2017) Antibiotic stewardship in low-and middle-income countries: 'same, but different'?, *Clinical Microbiology and Infection*. doi: 10.1016/j.cmi.2017.07.010
  16. Shah, N., Joshi, A., & Ganguly, B. (2017) Impact of Antibiotic Stewardship Program on Prescribing Pattern of Antimicrobials in Patients of Medical Intensive Care Unit. *J Clin. Diagn Res.* July 2017 11(7): 11-15 doi: [10.7860/JCDR/2017/27171.10237](https://doi.org/10.7860/JCDR/2017/27171.10237)
  17. Shafiq, N., Praveen Kumar, M., Gautam, V. et al. (2016). Antibiotic stewardship in a tertiary care hospital of a developing country: establishment of a system and its application in a unit--GASP Initiative. *Infection* 44(5): 651-659. <https://doi.org/10.1007/s15010-016-0913-z>
  18. Ravi, N., Laha, A., Hmar, L., Chatterjee, S., Goswami, J., Goel, G., Dhar, K., Ghosh, T., Chatterjee, S., Datta, S.S., Bhattacharya, S. (2017). Exploring the prescribing behaviours and the mind of antibiotic prescribers is critical for a successful antibiotic stewardship program: Results of a survey from Eastern India. *Indian Journal of Medical Microbiology*, 35(2): 299-301. Doi: 10.4103/ijmm.IJMM\_17\_133.
  19. Carayon, P., Schoofs Hundt, A., Karsh, B., Gurses, A., Alvarado, C., Smith, M., Flatley Brennan P. (2006). Work system design for patient safety: the SEIPS model. *BMJ Quality & Safety* 2006; 15: 50-58. <http://dx.doi.org/10.1136/qshc.2005.015842>
  20. O'Brien BC, Harris IB, Beckman TJ, Reed DA, Cook DA. Standards for reporting qualitative research: a synthesis of recommendations. *Acad Med.* 2014;89(9):1245-1251.

- 1  
2  
3 21. Rimawi, R.H., Mazer, M.A., Siraj, D.S., Gooch, M., Cook, P.P. (2013). "Impact of Regular  
4 Collaboration between Infectious Diseases and Critical Care Practitioners on  
5 Antimicrobial Utilization and Patient Outcome." *Crit Care Med.* 2013 Sep;41(9):2099-  
6 107.  
7
- 8 22. Oxman, D.A., Adams, C.D. Deluke, G., et al. (2015). Improving Antibiotic De-Escalation  
9 in Suspected Ventilator-Associated Pneumonia: An Observational Study With a  
10 Pharmacist-Driven Intervention. *Journal of Pharmacy Practice* . Vol 28, Issue 5, pp.  
11 457 – 461. doi: 10.1177/0897190014527316  
12
- 13 23. Stålsby Lundborg C., Tamhankar A.J. (2014). Understanding and changing human  
14 behaviour—antibiotic mainstreaming as an approach to facilitate modification of  
15 provider and consumer behaviour. *Uppsala Journal of Medical Sciences.*  
16 2014;119(2):125-133. doi:10.3109/03009734.2014.905664.  
17
- 18 24. Charani, E; Edwards, R; Sevdalis, N; et al. Behavior Change Strategies to Influence  
19 Antimicrobial Prescribing in Acute Care: A Systematic Review, *Clinical Infectious*  
20 *Diseases*, Volume 53, Issue 7, 1 October 2011, Pages 651–662.  
21
- 22 25. Livorsi, D., Comer, A., Matthias, M., Perencevich, E., Bair, M. (2015). Factors  
23 influencing antibiotic-prescribing decisions among inpatient physicians: a qualitative  
24 investigation. *Infection control and hospital epidemiology.* 2015;36(9):1065-1072.  
25 doi:10.1017/ice.2015.136.  
26
- 27 26. Jawhari, B., Keenan, L., Zakus, D., et al. (2016). Barriers and facilitators to Electronic  
28 Medical Record (EMR) use in an urban slum. *International Journal of Medical*  
29 *Informatics.* Volume 94, October 2016, Pages 246-254.  
30
- 31 27. Forrest, G; Van Schooneveld, T; Kullar, R; et al. (2014). Use of Electronic Health  
32 Records and Clinical Decision Support Systems for Antimicrobial Stewardship,  
33 *Clinical Infectious Diseases*, Volume 59, Issue 3, Pages S122–S133.  
34
- 35 28. Shet A, Sundaresan S, Forsberg BC. Pharmacy-based dispensing of antimicrobial  
36 agents without prescription in India: appropriateness and cost burden in the private  
37 sector. *Antimicrobial Resistance and Infection Control.* 2015;4:55.  
38 doi:10.1186/s13756-015-0098-8.  
39
- 40 29. Chang Q, Wang W, Regev-Yochay G, Lipsitch M, Hanage WP. Antibiotics in agriculture  
41 and the risk to human health: how worried should we be? *Evolutionary Applications.*  
42 2015;8(3):240-247. doi:10.1111/eva.12185.  
43
- 44 30. Centers for Disease Control (2017). One Health Basics. Available at:  
45 <https://www.cdc.gov/onehealth/basics/index.html>  
46
- 47 31. Lübbert, C., Baars, C., Dayakar, A. et al. Environmental pollution with antimicrobial  
48 agents from bulk drug manufacturing industries in Hyderabad, South India, is  
49 associated with dissemination of extended-spectrum beta-lactamase and  
50 carbapenemase-producing pathogens. *Infection* (2017) 45: 479. Doi:  
51 10.1007/s15010-017-1007-2  
52  
53  
54  
55  
56  
57  
58  
59

**Table 1.** Themes identified from SEIPS components with corresponding representative quotations

| Theme                                    | Representative Quote                                                                                                                                                                                                                                                                                                                                               |
|------------------------------------------|--------------------------------------------------------------------------------------------------------------------------------------------------------------------------------------------------------------------------------------------------------------------------------------------------------------------------------------------------------------------|
| <b>Organization</b>                      |                                                                                                                                                                                                                                                                                                                                                                    |
| <i>Antimicrobial Stewardship Program</i> | 1. "We audit to make sure the right indication is happening. We check to see the dosage is correct and monitor what's happening here to track our prescriptions." (pharmacist)                                                                                                                                                                                     |
|                                          | 2. "Every year we do something with the antibiotic prescription program. Along with infection control. Usually a three-day program for doctors and one day is dedicated to antibiotic stewardship. Speakers from all over the country [come] and we take about 30-35 doctors a year and try to teach them about antibiotic stewardship." (infection control nurse) |
|                                          | 3. "The medical superintendent is a part of our team. I don't think you can get much higher up than that. The management is very supportive." (pharmacist)                                                                                                                                                                                                         |
| <i>Microbiology laboratory</i>           | 4. "Our microbiology lab is one of the best in the country. They are very reliable and help us immensely." (physician)                                                                                                                                                                                                                                             |



|                                                |                                                                                                                                                                                                                                                                                                                                                                                                                                                                                                                                                                          |
|------------------------------------------------|--------------------------------------------------------------------------------------------------------------------------------------------------------------------------------------------------------------------------------------------------------------------------------------------------------------------------------------------------------------------------------------------------------------------------------------------------------------------------------------------------------------------------------------------------------------------------|
|                                                | <p>5. "Whenever the lab grows something in the culture, could be six hours, ten hours, we are called and told. So that does impact our management. If we are thinking about a gram positive illness and we get a culture that's gram negative, which is grown very quickly, we totally change our report. We are informed pretty quickly." (physician)</p>                                                                                                                                                                                                               |
| <p><i>Clinical pharmacist availability</i></p> | <p>6. "[Pharmacists are] not routinely in the ICU. I wish more pharmacists would tell physicians their doses or their drug interactions are wrong, but I don't see them in the cardiac or pediatric ICU." (physician)</p> <p>7. "We have one pharmacist in our ICU, she visits. The problem with her is she's overworked. She's alone. She comes on the rounds only sometimes and comes around and checks the antibiotics dosing is correct. But duration and all others are decided by physicians. If there were more of them it would be much better." (physician)</p> |
|                                                | <p>8. "If a clinician is working alone, we may not have much concern about things that pharmacists are more aware of, like drug interactions. Routine medications may have interactions also, so pharmacists' help is needed. That type of information is more with the pharmacists, not the clinicians. They are not always available." (physician)</p>                                                                                                                                                                                                                 |
| <p><b>Person</b></p>                           |                                                                                                                                                                                                                                                                                                                                                                                                                                                                                                                                                                          |
| <p><i>Antibiotic stewardship knowledge</i></p> | <p>9. "Antibiotic stewardship is a standardized practice with the right treatment at the right time." (physician)</p>                                                                                                                                                                                                                                                                                                                                                                                                                                                    |

|                                                                |                                                                                                                                                                                                                                                                                                                                                                            |
|----------------------------------------------------------------|----------------------------------------------------------------------------------------------------------------------------------------------------------------------------------------------------------------------------------------------------------------------------------------------------------------------------------------------------------------------------|
|                                                                | 10. "To me antibiotic stewardship is to start judicious antibiotics...I won't say to start low antibiotics, I say to start optimum antibiotics." (physician)                                                                                                                                                                                                               |
|                                                                | 11. "Most of us here are aware of these ideas. For us, it's about everything that has to do with a prescription. The ultimate aim is judicious use of antibiotics. We need to use the right antibiotics, the right dose." (physician)                                                                                                                                      |
| <i>Physician resistance to antibiotic stewardship policies</i> | 12. "I think clinicians are empowered to think that they know best. They need to recognize the roles of the microbiologists and the pharmacists and should not feel low that they have asked for help." (physician)                                                                                                                                                        |
|                                                                | 13. "Challenges come from navigating human behavior. Sometimes you'll recommend things but people just won't listen to you." (infection control nurse)                                                                                                                                                                                                                     |
| <b>Tasks</b>                                                   |                                                                                                                                                                                                                                                                                                                                                                            |
| <i>Antibiotic prescribing</i>                                  | 14. "We have a high patient load and socioeconomic status is a big deal. Poverty and malnourished children are a reality. We can't wait for cultures. We have protocols to start them on antibiotics according to which ones have been most successful here." (physician)                                                                                                  |
|                                                                | 15. "I think it's a problem all over India, because the first antibiotics they prescribe is the carbapenems. And once they prescribe it is never de-escalated or rarely de-escalated. Basically they go, 'let's continue. What the culture says? I don't want to do that. Let's just continue because he's improving.' So it's a major, major, major problem." (physician) |

|                                         |                                                                                                                                                                                                                                                                                                                                                                                                                                                      |
|-----------------------------------------|------------------------------------------------------------------------------------------------------------------------------------------------------------------------------------------------------------------------------------------------------------------------------------------------------------------------------------------------------------------------------------------------------------------------------------------------------|
| <p><i>Workload</i></p>                  | <p>16. "Sometimes we are busy and we forget pre admission drugs which are missed because we are more worried about the current problems, and there are so many the patient is already on, that we need to continue." (physician)</p>                                                                                                                                                                                                                 |
|                                         | <p>17. "Our work here does affect how long you can spend on individual cases." (infection control nurse)</p>                                                                                                                                                                                                                                                                                                                                         |
| <p><b>Tools and Technology</b></p>      |                                                                                                                                                                                                                                                                                                                                                                                                                                                      |
| <p><i>Antibiogram</i></p>               | <p>18. "It is an annual antibiogram. We divide it into gram positive, gram negative, and yeast. We also have a blood gram positive from blood isolates, negative, and yeast. They are separate. We follow international guidelines so for any isolate that is more than 30, we take them and follow the rules. Every year it is updated. This year they are trying to involve more pharmacists" (infection control nurse)</p>                        |
| <p><i>Electronic medical record</i></p> | <p>19. "If I look today at the record, I can only see what they took today. The current medications only. Not what they got yesterday. I can't trace the meropenem. To see all the drugs we have to go to the paper medical record room. It's a very tedious process. We don't know the dose or duration or all the drugs...if the patient returns in a few weeks, we don't know what they were taking and what will be effective." (pharmacist)</p> |
|                                         | <p>20. "I see 80 patients a day. So it's not possible for me to spend so much time logging in, recording all this. I don't think it's possible unless I had someone sitting next to me doing just that." (physician)</p>                                                                                                                                                                                                                             |

| <b>Environment</b>                                                 |                                                                                                                                                                                                                                                                                                                                                                        |
|--------------------------------------------------------------------|------------------------------------------------------------------------------------------------------------------------------------------------------------------------------------------------------------------------------------------------------------------------------------------------------------------------------------------------------------------------|
| <i>Posters or signs promoting antibiotic stewardship awareness</i> | 21. "It's only in protocols, which we do print out only for doctors. Nurses don't see that." (physician)                                                                                                                                                                                                                                                               |
|                                                                    | 22. "We have some print-outs on our notice board about colistin and other higher-end antibiotics...but we don't have posters. As for the printouts, they aren't that catchy." (physician)                                                                                                                                                                              |
| <i>High levels of community antibiotic use</i>                     | 23. "Outside the hospital this is a rampant problem in India. There is much abuse and misuse of antibiotics. Anyone can just go to a roadside pharmacy and describe their symptoms and get antibiotics over the counter just like that. They just go to the guy sitting there and get whatever. I think we should make it much harder to get antibiotics." (physician) |

Frequently used abbreviations:

LMIC: low and middle income countries

ASP: antibiotic stewardship program

AS: antibiotic stewardship

SEIPS: Systems Engineering Initiative for Patient Safety

EMR: electronic medical record

## Appendix A: Antibiotic Stewardship Interview Questions

Interviewer: Antibiotic stewardship refers to the judicious use of antibiotics, and is a critical component of reducing antibiotic resistance. Components of antibiotic stewardship involve drug expertise, evaluating ongoing antibiotic treatment, monitoring prescribing practices, and reporting information on antibiotic use and resistance.

Your responses will be recorded with a voice recorder and transcribed, but the responses will be de-identified in any data set and your identity will be kept confidential.

### *Person*

1. How do you define antibiotic stewardship?
2. What do you think of antibiotic stewardship as an infectious disease prevention strategy?
3. Describe your level of interaction working with infectious disease specialists at your hospital.
4. Physician/Nurse
  - a. Describe your work with pharmacists in your hospital.
    - i. If poor availability/they don't work with pharmacists: What factors limit their availability to you?
    - ii. How do you work with pharmacists on specific patients?
    - iii. In an ideal situation, what would be different about how you work with the pharmacists?
  - b. Tell me about your workload.
    - i. How does your workload impact your ability to complete your job responsibilities?
5. All clinicians: Describe employee turnover on your ward

### *Organization*

1. Describe your experience regarding antimicrobial stewardship education in your facility.
  - a. What is your view of these trainings (how likely are you to attend? Do you apply the information to your practice? Who attends?)?
2. What do you hear about antimicrobial stewardship at work?
3. Describe a time a new policy was implemented on your ward/in your lab.
  - a. What challenges were encountered? What went well? How did this compare to other times when new policies were implemented?
  - b. How were staff involved in the development of the new policy? How are they typically involved in policy development?
4. Tell me about your interactions with people involved in the antibiotic stewardship program.
  - a. What types of things do you collaborate on/communicate about?
  - b. How could your interactions be improved?
5. What is your sense of how hospital leaders/management are involved in antibiotic stewardship efforts in your ward/lab?

6. All clinicians: How could antibiotic prescribing be improved in your facility? Tell me about empiric prescribing at your hospital. What factors should be considered when prescribing an antibiotic if the cause of illness is not yet known?

### *Tasks*

1. Lab Staff
  - a. Describe how you create an antibiogram.
    - i. How does creating an antibiogram fit in with your other job responsibilities?
    - ii. How often do you update the antibiogram?
    - iii. What is the scope of the antibiogram?
2. Nurses
  - a. What antibiotic stewardship practices are you responsible for on your ward?
  - b. How often do you review medications? Describe your review process.
  - c. What do you do when antibiotic usage seems questionable? Do you or your team decide together?
  - d. Are routine audits of antibiotic use conducted on your ward?
3. Pharmacists
  - a. What is your process when an antibiotic is ordered?
    - i. What are your selection review practices? Describe your collaboration with physicians.
    - ii. Describe your antibiogram use, including successes and challenges. How frequently is it updated?
4. Physicians
  - a. Describe your antibiotic selection process, including any guidelines you may use in making your decision.
    - i. Describe your antibiogram use, including successes and challenges. How frequently is it updated?
    - ii. How often are those guidelines adhered to in your workplace? If infrequently, what are the barriers to adherence?
  - b. Describe your review of antibiotic selection, including after the drug has been prescribed and after you have obtained culture results.
5. All clinicians: Where do you store information on antibiotic use (dosage, duration, indication)?
6. All clinicians: How often/how many cases of treatment failure related to resistance have you seen?
7. All staff: Evaluate the effect of your workload on your ability to implement antibiotic stewardship activities.
8. Describe what (if any) antibiotic resistance has had on your practice.
9. Describe what (if any) antibiotic resistance has had on your community.
10. What do you think would be the most useful strategies to help decrease antibiotic use?

### *Tools and Technology*

1. All clinicians: How do you determine a patient's antibiotic use status?

- 1
- 2
- 3 a. What resources or tools do you use to decide which antibiotic is most appropriate
- 4 for a patient?
- 5
- 6 2. Physicians and maybe pharmacists:
- 7 a. How does the lab impact your antibiotic prescribing?
- 8
- 9 3. Lab staff: What changes could be made to your lab that would help you to more
- 10 effectively support antibiotic prescribing/stewardship at your hospital?

### 11 *Environment*

12

13 What posters, signs, or other visual cues promoting good antibiotic prescribing are

14 present in your hospital? Where are they located? Which ones do you notice most?

15

16

17 Final: Is there anything I haven't asked you about antibiotic stewardship that you think is

18 important for me to know?

19

20

21

22

23

24

25

26

27

28

29

30

31

32

33

34

35

36

37

38

39

40

41

42

43

44

45

46

47

48

49

50

51

52

53

54

55

56

57

58

59

60

# Reporting checklist for qualitative study.

Based on the SRQR guidelines.

## Instructions to authors

Complete this checklist by entering the page numbers from your manuscript where readers will find each of the items listed below.

Your article may not currently address all the items on the checklist. Please modify your text to include the missing information. If you are certain that an item does not apply, please write "n/a" and provide a short explanation.

Upload your completed checklist as an extra file when you submit to a journal.

In your methods section, say that you used the SRQR reporting guidelines, and cite them as:

O'Brien BC, Harris IB, Beckman TJ, Reed DA, Cook DA. Standards for reporting qualitative research: a synthesis of recommendations. *Acad Med.* 2014;89(9):1245-1251.

|                                            | Reporting Item                                                                                                                                                                                                                                          | Page Number |
|--------------------------------------------|---------------------------------------------------------------------------------------------------------------------------------------------------------------------------------------------------------------------------------------------------------|-------------|
|                                            | <a href="#">#1</a> Concise description of the nature and topic of the study identifying the study as qualitative or indicating the approach (e.g. ethnography, grounded theory) or data collection methods (e.g. interview, focus group) is recommended | 5           |
|                                            | <a href="#">#2</a> Summary of the key elements of the study using the abstract format of the intended publication; typically includes background, purpose, methods, results and conclusions                                                             | 2           |
| Problem formulation                        | <a href="#">#3</a> Description and significance of the problem / phenomenon studied: review of relevant theory and empirical work; problem statement                                                                                                    | 3           |
| Purpose or research question               | <a href="#">#4</a> Purpose of the study and specific objectives or questions                                                                                                                                                                            | 2           |
| Qualitative approach and research paradigm | <a href="#">#5</a> Qualitative approach (e.g. ethnography, grounded theory, case study, phenomenology, narrative research) and guiding theory if appropriate; identifying the                                                                           | 5           |



research paradigm (e.g. postpositivist, constructivist / interpretivist) is also recommended; rationale. The rationale should briefly discuss the justification for choosing that theory, approach, method or technique rather than other options available; the assumptions and limitations implicit in those choices and how those choices influence study conclusions and transferability. As appropriate the rationale for several items might be discussed together.

|                                                                                                          |                                             |                                                                                                                                                                                                                                                                                                                                                                         |                                                                                                                                    |
|----------------------------------------------------------------------------------------------------------|---------------------------------------------|-------------------------------------------------------------------------------------------------------------------------------------------------------------------------------------------------------------------------------------------------------------------------------------------------------------------------------------------------------------------------|------------------------------------------------------------------------------------------------------------------------------------|
| 1<br>2<br>3<br>4<br>5<br>6<br>7<br>8<br>9<br>10<br>11<br>12<br>13                                        |                                             |                                                                                                                                                                                                                                                                                                                                                                         |                                                                                                                                    |
| 14<br>15<br>16<br>17<br>18<br>19<br>20<br>21<br>22<br>23<br>24<br>25<br>26<br>27<br>28<br>29<br>30<br>31 | Researcher characteristics and reflexivity  | <a href="#">#6</a> Researchers' characteristics that may influence the research, including personal attributes, qualifications / experience, relationship with participants, assumptions and / or presuppositions; potential or actual interaction between researchers' characteristics and the research questions, approach, methods, results and / or transferability | n/a. The team did not feel any characteristics dramatically influenced our devising of the interview guide or the data collection. |
| 32<br>33                                                                                                 | Context                                     | <a href="#">#7</a> Setting / site and salient contextual factors; rationale                                                                                                                                                                                                                                                                                             | 4                                                                                                                                  |
| 34<br>35<br>36<br>37<br>38<br>39<br>40                                                                   | Sampling strategy                           | <a href="#">#8</a> How and why research participants, documents, or events were selected; criteria for deciding when no further sampling was necessary (e.g. sampling saturation); rationale                                                                                                                                                                            | 5                                                                                                                                  |
| 41<br>42<br>43<br>44<br>45<br>46                                                                         | Ethical issues pertaining to human subjects | <a href="#">#9</a> Documentation of approval by an appropriate ethics review board and participant consent, or explanation for lack thereof; other confidentiality and data security issues                                                                                                                                                                             | 6                                                                                                                                  |
| 47<br>48<br>49<br>50<br>51<br>52<br>53<br>54<br>55<br>56                                                 | Data collection methods                     | <a href="#">#10</a> Types of data collected; details of data collection procedures including (as appropriate) start and stop dates of data collection and analysis, iterative process, triangulation of sources / methods, and modification of procedures in response to evolving study findings; rationale                                                             | 5                                                                                                                                  |
| 57<br>58<br>59<br>60                                                                                     | Data collection                             | <a href="#">#11</a> Description of instruments (e.g. interview guides,                                                                                                                                                                                                                                                                                                  | Appendix 1                                                                                                                         |

|                                                          |                                                                                              |                                                                                                                                                                                                                                                                                                                              |       |
|----------------------------------------------------------|----------------------------------------------------------------------------------------------|------------------------------------------------------------------------------------------------------------------------------------------------------------------------------------------------------------------------------------------------------------------------------------------------------------------------------|-------|
| 1<br>2<br>3<br>4                                         | instruments and technologies                                                                 | questionnaires) and devices (e.g. audio recorders) used for data collection; if / how the instruments(s) changed over the course of the study                                                                                                                                                                                |       |
| 5<br>6<br>7<br>8<br>9                                    | Units of study                                                                               | <a href="#">#12</a> Number and relevant characteristics of participants, documents, or events included in the study; level of participation (could be reported in results)                                                                                                                                                   | 5     |
| 10<br>11<br>12<br>13<br>14<br>15<br>16<br>17<br>18       | Data processing                                                                              | <a href="#">#13</a> Methods for processing data prior to and during analysis, including transcription, data entry, data management and security, verification of data integrity, data coding, and anonymisation / deidentification of excerpts                                                                               | 6     |
| 19<br>20<br>21<br>22<br>23<br>24<br>25                   | Data analysis                                                                                | <a href="#">#14</a> Process by which inferences, themes, etc. were identified and developed, including the researchers involved in data analysis; usually references a specific paradigm or approach; rationale                                                                                                              | 6     |
| 26<br>27<br>28<br>29<br>30                               | Techniques to enhance trustworthiness                                                        | <a href="#">#15</a> Techniques to enhance trustworthiness and credibility of data analysis (e.g. member checking, audit trail, triangulation); rationale                                                                                                                                                                     | 6     |
| 31<br>32<br>33<br>34<br>35                               | Syntheses and interpretation                                                                 | <a href="#">#16</a> Main findings (e.g. interpretations, inferences, and themes); might include development of a theory or model, or integration with prior research or theory                                                                                                                                               | 6     |
| 36<br>37<br>38<br>39                                     | Links to empirical data                                                                      | <a href="#">#17</a> Evidence (e.g. quotes, field notes, text excerpts, photographs) to substantiate analytic findings                                                                                                                                                                                                        | 18-22 |
| 40<br>41<br>42<br>43<br>44<br>45<br>46<br>47<br>48<br>49 | Intergration with prior work, implications, transferability and contribution(s) to the field | <a href="#">#18</a> Short summary of main findings; explanation of how findings and conclusions connect to, support, elaborate on, or challenge conclusions of earlier scholarship; discussion of scope of application / generalizability; identification of unique contributions(s) to scholarship in a discipline or field | 12    |
| 50<br>51                                                 | Limitations                                                                                  | <a href="#">#19</a> Trustworthiness and limitations of findings                                                                                                                                                                                                                                                              | 12    |
| 52<br>53<br>54<br>55<br>56<br>57                         | Conflicts of interest                                                                        | <a href="#">#20</a> Potential sources of influence of perceived influence on study conduct and conclusions; how these were managed                                                                                                                                                                                           | 1     |
| 58<br>59<br>60                                           | Funding                                                                                      | <a href="#">#21</a> Sources of funding and other support; role of funders                                                                                                                                                                                                                                                    | 1     |

in data collection, interpretation and reporting

The SRQR checklist is distributed with permission of Wolters Kluwer © 2014 by the Association of American Medical Colleges. This checklist can be completed online using <https://www.goodreports.org/>, a tool made by the [EQUATOR Network](#) in collaboration with [Penelope.ai](#)

For peer review only

# BMJ Open

## Evaluating Antibiotic Stewardship in a Tertiary Care Hospital in Kerala, India: A Qualitative Interview Study

|                                 |                                                                                                                                                                                                                                                                                                                                                                                                                                                                                                                                                                                                                                                                                                                                                                  |
|---------------------------------|------------------------------------------------------------------------------------------------------------------------------------------------------------------------------------------------------------------------------------------------------------------------------------------------------------------------------------------------------------------------------------------------------------------------------------------------------------------------------------------------------------------------------------------------------------------------------------------------------------------------------------------------------------------------------------------------------------------------------------------------------------------|
| Journal:                        | <i>BMJ Open</i>                                                                                                                                                                                                                                                                                                                                                                                                                                                                                                                                                                                                                                                                                                                                                  |
| Manuscript ID                   | bmjopen-2018-026193.R3                                                                                                                                                                                                                                                                                                                                                                                                                                                                                                                                                                                                                                                                                                                                           |
| Article Type:                   | Research                                                                                                                                                                                                                                                                                                                                                                                                                                                                                                                                                                                                                                                                                                                                                         |
| Date Submitted by the Author:   | 15-Mar-2019                                                                                                                                                                                                                                                                                                                                                                                                                                                                                                                                                                                                                                                                                                                                                      |
| Complete List of Authors:       | Baubie, Kelsey; University of Wisconsin Madison, Infectious Disease<br>Shaughnessy, Catherine; University of Wisconsin Madison, Infectious Disease<br>Kostiuk, Lia; University of Wisconsin Madison<br>Joseph, Mariam; Amrita Institute of Medical Sciences and Research Centre, Pharmacy<br>Safdar, Nasia ; University of Wisconsin Madison, Infectious Disease;<br>William S. Middleton Memorial Veterans Hospital, Research<br>Singh, Sanjeev; Amrita Institute of Medical Sciences and Research Centre, Hospital Administration<br>Siraj, Dawd; University of Wisconsin Madison, Infectious Disease<br>Sethi, Ajay; University of Wisconsin Madison, Population Health Sciences<br>Keating, Julie; William S. Middleton Memorial Veterans Hospital, Research |
| <b>Primary Subject Heading</b>: | Global health                                                                                                                                                                                                                                                                                                                                                                                                                                                                                                                                                                                                                                                                                                                                                    |
| Secondary Subject Heading:      | Infectious diseases                                                                                                                                                                                                                                                                                                                                                                                                                                                                                                                                                                                                                                                                                                                                              |
| Keywords:                       | PUBLIC HEALTH, QUALITATIVE RESEARCH, INFECTIOUS DISEASES                                                                                                                                                                                                                                                                                                                                                                                                                                                                                                                                                                                                                                                                                                         |
|                                 |                                                                                                                                                                                                                                                                                                                                                                                                                                                                                                                                                                                                                                                                                                                                                                  |

SCHOLARONE™  
Manuscripts

1  
2  
3 Evaluating Antibiotic Stewardship in a Tertiary Care Hospital in Kerala, India: A Qualitative  
4 Interview Study  
5  
6

7 Kelsey Baubie, MS, MPH\*<sup>1</sup>, Catherine Shaughnessy, BS\*<sup>1</sup>, Lia Kostiuk, MD<sup>1</sup>, Mariam Varsha  
8 Joseph, PharmD<sup>2</sup>, Nasia Safdar MD, PhD<sup>1,4</sup>, Sanjeev Singh, MBBS, PhD, MPhil, DCH<sup>3</sup>, Dawd  
9 Siraj, MD, MPH<sup>1</sup>, Ajay Sethi, PhD<sup>5</sup>, Julie Keating, PhD<sup>4</sup>

10 \*denotes equal contribution  
11  
12  
13

14 1. Department of Infectious Disease, University of Wisconsin Madison School of Medicine  
15 and Public Health, Madison, Wisconsin, USA

16 2. Department of Pharmacy, Amrita Institute of Medical Sciences and Research Centre,  
17 Cochin, Kerala, India

18 3. Department of Hospital Administration, Amrita Institute of Medical Sciences and  
19 Research Centre, Cochin, Kerala, India

20 4. Department of Research, William S. Middleton Memorial Veterans Administration  
21 Hospital, Madison, Wisconsin, USA

22 5. Department of Population Health Sciences, University of Wisconsin Madison School of  
23 Medicine and Public Health, Madison, Wisconsin, USA  
24  
25  
26  
27

28 Corresponding author:

29 Kelsey Baubie, Clinical Science Center, 600 Highland Ave Madison WI 53792

30 Phone: 608-262-9223

31 Email: baubie@wisc.edu  
32  
33  
34

35 Email addresses for other authors: Catherine Shaughnessy, ceshaugh@medicine.wisc.edu

36 Lia Kostiuk, lkostiuk@wisc.edu

37 Mariam Varsha Joseph, mariamvj@aims.amrita.edu

38 Nasia Safdar, ns2@medicine.wisc.edu

39 Sanjeev Singh, sanjeevksingh@aims.amrita.edu

40 Dawd Siraj, dssiraj@medicine.wisc.edu

41 Ajay Sethi, aksethi@wisc.edu

42 Julie Keating, jakeating@medicine.wisc.edu  
43  
44  
45  
46  
47

48 Word count of manuscript body: 2951  
49

50 Contributorship Statement: KB and CS created the interview guides, wrote the manuscript,  
51 and conducted on-site data collection. LK assisted with on-site data collection, writing and  
52 editing of the manuscript. MVJ assisted with on-site data collection and editing of the  
53 manuscript. NS and SS edited the manuscript and devised the project. DS assisted with  
54  
55  
56  
57  
58  
59  
60

1  
2  
3 writing and editing the manuscript. AS helped with the grant and edited the manuscript. JK  
4 edited the manuscript.  
5

6  
7 Data sharing statement: Individual interview transcripts are available upon request to the  
8 corresponding author.  
9

10 Funding: This project was funded by the University of Wisconsin Global Health Institute.

11 Conflict of interests: None of the authors report any conflict of interests.  
12  
13  
14  
15  
16  
17

## 18 Abstract

19  
20 Objectives: To determine what barriers and facilitators to antibiotic stewardship exist within  
21 a healthcare facility.  
22

23  
24 Setting: 1300 bed tertiary care private hospital located in the state of Kerala, India.  
25

26 Participants: 31 semi-structured interviews and 4 focus groups with hospital staff ranging  
27 from physicians, nurses, pharmacists, and a clinical microbiologist.  
28

29  
30 Results: Key facilitators of antibiotic stewardship (AS) at the hospital included a dedicated  
31 committee overseeing appropriate inpatient antibiotic use, a prompt microbiology lab, a  
32 high level of AS understanding among staff, established guidelines for empiric prescribing,  
33 and an easily-accessible antibiogram. We identified the following barriers: limited access to  
34 clinical pharmacists, physician immunity to change regarding stewardship policies,  
35 infrequent antibiotic de-escalation, high physician workload, an incomplete electronic  
36 medical record (EMR), inadequate antibiotic stewardship program (ASP) physical visibility,  
37 and high antibiotic use in the community.  
38  
39

40 Conclusions: Opportunities for improvement at this institution include increasing  
41 accessibility to clinical pharmacists, implementing strategies to overcome physician  
42 immunity to change, and establishing a more accessible and complete EMR. Our findings are  
43 likely to be of use to institutions developing ASPs in lower resource settings.  
44  
45

46 Keywords: Antibiotic stewardship, antibiotic stewardship programs, antibiotic resistance,  
47 India, SEIPS  
48  
49  
50  
51  
52  
53  
54  
55  
56  
57  
58  
59

### Strengths and limitations of this study

- Our study is the first of its kind to systematically examine the key barriers and facilitators of implementing an ASP in a low/middle-income country (LMIC).
- We interviewed a variety of healthcare workers: physicians, nurses, clinical pharmacists, and a microbiologist.
- This was a single center study. Thus, transferability of our findings to more resource-limited rural hospitals within India or to other LMIC may not be possible.
- We did not conduct direct observations of practice to correlate with self-reporting.

### Background

The United Nations declared antimicrobial resistance to be “the greatest and most urgent global risk” in 2016<sup>1</sup>. Antibiotic overuse and misuse drives antimicrobial resistance<sup>2</sup>. In India, rates of infections caused by antibiotic resistant bacteria are high and increasing<sup>3-11</sup>. Given that the main driver of antibiotic resistance is antibiotic use and misuse, antibiotic stewardship (AS) and antibiotic stewardship programs (ASP) have a critical role in promoting judicious antibiotic use<sup>12</sup>.

In a recent review of AS studies spanning every continent, Davey et al. found ASPs were effective in decreasing treatment duration and increasing adherence to antibiotic use policy<sup>13</sup>. While the evidence for ASP effectiveness is growing, there is considerable variation among ASPs in size, activities, and scope. Newly published consensus of an ASP core elements checklist includes experts from twelve countries on six continents and should be considered by healthcare centers when considering their individual ASP, no matter their economic status<sup>14</sup>. This checklist includes some of the elements we identified as areas of strength in this institution: senior hospital management support, a formal ASP, and timely access to laboratory results. Still, we recognize low and middle income countries (LMIC) face

1  
2  
3 ASP implementation challenges including limited diagnostic lab capability, inadequate  
4 awareness, limited access to quality antibiotics, and high patient census<sup>15</sup>. To date, few  
5 studies have explored the challenges facilities in India face carrying out ASPs, such as less  
6 available manpower and money dedicated to maintaining a detailed electronic medical  
7 record (EMR) compared to higher income country counterparts<sup>16-18</sup>. EMR systems have been  
8 found to be one of the most effective ways of keeping records on patient care and allow for  
9 easier discussion and feedback on antibiotic choices<sup>17</sup>. We selected India because, as  
10 mentioned, antibiotic resistance rates are high and increasing, and our study facility had  
11 recently implemented an ASP to address this issue. Thus, we undertook a prospective  
12 qualitative study in Kerala, India to examine the barriers and facilitators to practicing AS in  
13 a LMIC healthcare setting and to identify opportunities to improve AS.  
14  
15  
16  
17  
18  
19  
20  
21  
22  
23  
24  
25  
26  
27  
28

## 29 Methods

### 30 *Location*

31  
32  
33 In January 2018, we conducted a qualitative study to understand the barriers and  
34 facilitators to AS at a 1300 bed tertiary care private hospital located in the state of Kerala,  
35 India. This urban hospital, which includes 275 intensive care beds, provides free or  
36 subsidized advanced care for two-thirds of its patient population. AS activities began in  
37 2015. The hospital's ASP, members of which include internists, surgeons, a microbiologist,  
38 critical care physicians, infection control nurses, and an administrator, began in 2016. The  
39 Chief Medical Officer, the head of both the institution as a whole and the ASP itself, initiated  
40 the antibiotic stewardship meetings, infectious disease rounds, chart review of patients.  
41 Committee members are a mix of junior, mid-level, and senior staff and serve for at least two  
42 years with the option to continue involvement afterward.  
43  
44  
45  
46  
47  
48  
49  
50  
51  
52  
53  
54  
55  
56  
57  
58  
59  
60



### *Study population*

Physicians, nurses, clinical pharmacists, and a microbiologist were identified by the on-site study team by emailing information to staff regarding the project and subsequently approached staff in-person to identify interested participants. We included senior faculty and healthcare professionals working on the critical care medicine and infectious disease teams for interview. Exclusion criteria included non-English speaking staff and staff who were subordinates to any member of the study team.

### *Data collection*

We conducted 31 semi-structured interviews and 4 focus groups with hospital staff involved in AS. Interview guides were developed based on the Systems Engineering Initiative for Patient Safety (SEIPS) framework. This framework evaluates the interactions between the people, organization, tasks, tools/technology, and environment of a given work system, allowing for identification of key areas for improvement or intervention<sup>19</sup>. Interviews were conducted in private rooms at the hospital, and were audio recorded after obtaining verbal consent from the participant. No personal information was recorded, and each interview lasted between 10 and 30 minutes. The interview guides used have been included for reference (Appendix A).

### *Analysis*

All interviews were transcribed and analyzed deductively using the SEIPS framework. One member from the study team manually coded the interview transcripts. Quotations from transcribed interviews were sorted into the SEIPS categories of person, organization, tasks, tools/technology, and physical environment. After all study team members agreed on the identified themes from the interviews, the most prominent barriers and facilitators to AS

1  
2  
3 were identified in each category based on number of participant responses. We used the  
4  
5 Standards for Reporting Qualitative Research (SRQR) guidelines<sup>20</sup>.  
6

### 7 8 *Ethics approval*

9  
10 The Institutional Review Board at the University of Wisconsin-Madison granted this  
11  
12 study exemption from full review. The Internal Ethics Committee at the participating  
13  
14 hospital reviewed the study and granted approval (IRB# 2017-1268).  
15  
16

### 17 18 *Patient and Public Involvement statement*

19  
20 The development of our study was informed by many patients' preference to get  
21  
22 antibiotics right away, just in case these drugs help. This can influence how healthcare  
23  
24 providers deal with prescribing. We did not involve patients with the design or conduct of  
25  
26 the study. Results will be disseminated to the involved healthcare workers at staff meetings  
27  
28 and electronic communications.  
29  
30

### 31 32 **Results**

33  
34 In total, we interviewed 45 hospital faculty and staff. Participants included individual  
35  
36 interviews with physicians (27), clinical pharmacists (3), and one microbiologist. We also  
37  
38 conducted four focus groups consisting of ASP team members, pharmacists (two groups),  
39  
40 and infection control nurses with two to five participants each.  
41  
42

### 43 44 *Organization*

45  
46 The hospital's ASP is the key organizational component of promoting judicious  
47  
48 antibiotic use and is in addition to the three clinical pharmacists and one infection control  
49  
50 nurse the hospital uses as dedicated, full-time stewardship positions. The ASP team  
51  
52 evaluates the list of inpatients receiving antibiotics to evaluate "The Five R's" of antibiotic  
53  
54 prescribing: right drug, right dose, right frequency, right duration, and right indication. When  
55  
56  
57  
58  
59  
60

1  
2  
3 the team identifies opportunities for antibiotic de-escalation or reduced duration, a clinical  
4 pharmacist member contacts the prescribing physician to issue treatment  
5 recommendations, and the prescribing physician decides whether to modify treatment.  
6  
7 Typically the hospital sees 30 “higher antibiotic” prescriptions a day; these are the cases the  
8 ASP reviews. Usually the committee has suggestions for five or six cases, most often  
9  
10 communicating these with staff via email for recording/tracking purposes. In-person  
11 communication during rounds, telephone calls, and text messages to the microbiologists in  
12 the lab are also utilized as they are more effective methods of quick communication.  
13  
14  
15  
16  
17  
18  
19  
20  
21

22 According to about half of respondents, hospital administrative leadership  
23 champions the ASP by being involved in the meetings, handling difficult conversations with  
24 physicians, and instilling confidence in all staff that the ASP is working with them to improve  
25 patient care. Staff in turn view their institution’s ASP as a key facilitator of AS at the hospital  
26 (Table 1, quotes 1-3). In addition to the ASP itself, 17 interviewees regarded the  
27 microbiology lab as a key facilitator of AS. Staff praised the 24-hour lab’s promptness and  
28 the rapidity with which lab staff uploaded results into the EMR. In addition, many physicians  
29 relied on the microbiologist’s expertise for help identifying microorganisms in complicated  
30 infections (Table 1, quotes 4 and 5). As one physician said, “If we are thinking about a gram  
31 positive illness and we get a culture that’s gram negative, which is grown very quickly, we  
32 totally change our report.”  
33  
34  
35  
36  
37  
38  
39  
40  
41  
42  
43  
44  
45  
46

47 Despite having an effective stewardship program and lab, 16 interviewees identified  
48 limited clinical pharmacist availability as a barrier to AS. In India, clinical pharmacists must  
49 complete a six year Doctorate program from an accredited university to receive licensure,  
50 and many physicians recognized clinical pharmacists’ knowledge as a critical component of  
51  
52  
53  
54  
55  
56  
57  
58  
59  
60

1  
2  
3 patient care. However, several departments had one clinical pharmacist and many had none  
4  
5 at all. Staff worried this lack of pharmacist access may cause clinicians to miss drug  
6  
7 interactions or prescribe antibiotics at incorrect dosages (Table 1, quotes 6-8).  
8  
9

### 10 *Person*

11  
12 During our interviews, staff identified AS activities, such as using the correct  
13  
14 antibiotic at the correct dose, as a key component of reducing antibiotic resistance. In  
15  
16 addition, staff mentioned they often heard about AS at work. This high level of awareness  
17  
18 among staff facilitates AS practices (Table 1, quotes 9-11).  
19  
20  
21

22 While most interviewed staff demonstrated AS policy understanding, they revealed  
23  
24 many physicians resisted accepting suggestions from the ASP. Moreover, several physicians  
25  
26 and pharmacists worried other physicians did not acknowledge pharmacists' contributions  
27  
28 to patient care. According to nine interviewees, this immunity to change may impede AS  
29  
30 practices and contribute to antibiotic resistance through incorrect antibiotic dosing and  
31  
32 duration (Table 1, quotes 12 and 13). One clinician described this phenomena for us by  
33  
34 saying, "I think clinicians are empowered to think that they know best. They need to  
35  
36 recognize the roles of the microbiologists and the pharmacists and should not feel low that  
37  
38 they have asked for help." A nurse we spoke to distilled the issue; "Challenges come from  
39  
40 navigating human behavior." Staff immunity to change may present challenges for other  
41  
42 LMIC as well; strategies which have been helping this particular facility are publishing easily  
43  
44 accessible guidelines and committing to persistent interaction between staff and the ASP. In  
45  
46 this way, AS is a priority which is tended to and fostered as an institution-wide value.  
47  
48  
49  
50  
51

### 52 *Tasks*

1  
2  
3 Staff in 12 interviews felt that clinicians follow established guidelines when  
4 prescribing antibiotics when the cause of illness is not yet known. Following a clinical  
5 evaluation, the physician orders a culture and initiates a broad-spectrum antibiotic.  
6  
7 Physicians then use this culture result to modify the original antibiotic used. This process,  
8 often called de-escalation, involves selecting an antibiotic which has a more specific  
9 spectrum or stopping antibiotic treatment if the cultures do not identify a bacterial infection  
10 (Table 1, quote 14).  
11  
12  
13  
14  
15  
16  
17  
18

19 As a tertiary care facility, this hospital frequently treats high-risk patients who have  
20 acquired resistant infections in the community or at other hospitals. Therefore, physicians  
21 at our study institution often feel compelled to empirically prescribe broad-spectrum  
22 antibiotics while awaiting culture results. However, physicians often forget or refuse to de-  
23 escalate antibiotic use due to workload or fear of losing the patient. In our study, physicians  
24 and pharmacists in eight interviews worried this lack of de-escalation may increase the risk  
25 of antibiotic resistant infections (Table 1, quote 15) and cited de-escalation as the most  
26 important issue regarding antibiotic prescribing. Similarly, nine interviewed staff members  
27 feared their high workloads may negatively impact their ability to always judiciously  
28 prescribe antibiotics. Physicians noted they are often unable to spend sufficient time  
29 evaluating a patient and this, along with uncertainty over what exact drugs the patient has  
30 already taken pre-admission, leads to antibiotic over-prescription (Table 1, quotes 16 and  
31 17). This happens because if a patient has already taken a certain class of antibiotic and they  
32 haven't worked, prescribing more is not going to help.  
33  
34  
35  
36  
37  
38  
39  
40  
41  
42  
43  
44  
45  
46  
47  
48  
49  
50

### 51 *Tools/Technology*

52  
53  
54  
55  
56  
57  
58  
59  
60

1  
2  
3 The hospital microbiologist and clinical pharmacists update the hospital antibiogram  
4 annually. The antibiogram, which gives the percent of pathogens susceptible to various  
5 antimicrobial agents, is accessible on the hospital intranet and divided into Gram positive,  
6 Gram negative, and yeast. In 17 interviews, staff members identified this user-friendly tool  
7 as a key facilitator in selecting antibiotics based on hospital resistance patterns, a critical  
8 component of AS (Table 1, quote 18).  
9

10  
11  
12 In addition to the antibiogram, this hospital also utilizes an EMR, which to save money  
13 is built and maintained by the hospital's Information Technology department. The EMR is  
14 used to store information on inpatients, a useful addition for identifying immediate drug  
15 interactions and thereby reducing harm. However, the EMR does not contain a patient's full  
16 scope of antibiotic use, including antibiotic history, duration, and dose. This incompleteness  
17 often forces physicians and pharmacists to refer to a patient's paper health record, which  
18 one pharmacist described as a "tedious" process (Table 1, quote 19). Moreover, physician  
19 workflow does not include entering antibiotic data into the EMR. Due to high work volume,  
20 physicians depend on the ward secretary, nursing assistants, or research assistants to  
21 update the EMR. As one physician explained, "I see 80 patients a day. So it's not possible for  
22 me to spend so much time logging in, recording all this. I don't think it's possible unless I had  
23 someone sitting next to me doing just that." (Table 1, quote 20). A dozen interviewed staff  
24 members identified this inability to quickly access the full scope of a patient's antibiotic  
25 history as a barrier to judiciously prescribing antibiotics.  
26  
27  
28  
29  
30  
31  
32  
33  
34  
35  
36  
37  
38  
39  
40  
41  
42  
43  
44  
45  
46  
47  
48

### 49 *Environment*

50  
51  
52 Despite having a highly engaged AS team, staff mentioned the hospital did not have  
53 signs or posters to increase stewardship awareness, which several staff identified as a  
54  
55  
56  
57  
58  
59  
60

1  
2  
3 potentially useful addition. A few interviewees thought AS policies were sometimes printed  
4 and posted but did not “stand out.” These printed antibiotic prescribing protocols were not  
5 visible to all staff, and 23 interviewed staff members mentioned this limited visibility may  
6 inhibit widespread AS awareness. (Table 1, quotes 21 and 22)  
7  
8  
9

10  
11  
12 In addition, staff identified high local antibiotic use as a barrier to stewardship. As  
13 patients can purchase antibiotics over the counter or have been recently hospitalized at  
14 another facility, many patients enter the hospital already using antibiotics. These high use  
15 rates often lead to antibiotic resistant infections in the community, forcing physicians to  
16 prescribe broad-spectrum antibiotics. Furthermore, several staff feared the impact of high  
17 antibiotic use in animal husbandry and fisheries on spreading resistance. Seven staff  
18 members wished for enhanced antibiotic prescribing regulations and more AS awareness in  
19 greater India (Table 1, quote 23).  
20  
21  
22  
23  
24  
25  
26  
27  
28  
29  
30

### 31 **Discussion**

32  
33  
34 Our study is the first of its kind in the English language to systematically examine key  
35 barriers and facilitators of implementing ASP in a LMIC tertiary hospital. Using the SEIPS  
36 model, we examined the implementation of an ASP at a large tertiary care hospital in order  
37 to identify opportunities to improve this program.  
38  
39  
40  
41  
42

43 We found that limited access to clinical pharmacists, physician immunity to change  
44 resulting in infrequent antibiotic de-escalation, high physician workload, an inadequate  
45 EMR, inadequate physical visibility of stewardship activities, and high antibiotic use in the  
46 community were major barriers to effective ASP implementation. The presence of a prompt  
47 microbiology laboratory, high level of understanding of AS among staff, easily accessible  
48 antibiogram, and established guidelines for empiric prescribing were identified as important  
49  
50  
51  
52  
53  
54  
55  
56  
57  
58  
59  
60

1  
2  
3 facilitators of an effective ASP in this hospital. As Ravi et al. (2017) discovered, we found  
4 committed leadership from the administrator was a major factor as well<sup>17</sup>. This could be a  
5 main driver of why AS understanding and opinions about the facility's AS efforts were fairly  
6 unified among interviewees regardless of if they were involved in the ASP team or not.  
7  
8  
9  
10  
11

12 Our study found limited access to pharmacists was a barrier for an effective ASP.  
13 Multidisciplinary rounds with guideline-based antibiotic recommendations for specific  
14 infections have been found to decrease use and duration of both broad spectrum and high-  
15 end, reserve antibiotics<sup>21</sup>. Clinical pharmacists can provide real-time decision support which  
16 could significantly improve rates of antibiotic tailoring to culture data<sup>22</sup>. Empowering clinical  
17 pharmacists to identify highly misused antibiotics, design guideline-based de-escalation  
18 protocols, and participate in multidisciplinary rounds may improve the quality of ASP.  
19  
20  
21  
22  
23  
24  
25  
26  
27  
28

29 Physician resistance to changes in antibiotic use practices was identified as a barrier  
30 to an effective ASP. Factors which influence physician antibiotic prescribing habits include  
31 anxiety about missing an infection and the antibiotic prescribing behavior of peers<sup>23</sup>. This is  
32 an important active area of research; interventions such as encouraging reflection on  
33 practice, the use of audit and feedback, small-group learning with discussions and  
34 engagement by senior clinicians, and deploying multidisciplinary teams including clinical  
35 pharmacists have been shown to improve prescriber behavior<sup>24,25</sup>. In LMIC settings, we  
36 recommend leadership should actively promote ASP activities and their value. Feedback on  
37 antibiotic usage and patterns should be disseminated to improve adherence to local or  
38 national guidelines at this facility.  
39  
40  
41  
42  
43  
44  
45  
46  
47  
48  
49  
50  
51

52 We found that the usability and accessibility of the EMR were another barrier to an  
53 effective ASP. Adoption of an EMR can improve ASP by providing a centralized location for  
54  
55  
56  
57  
58  
59  
60



1  
2  
3 microbiology results and other relevant clinical data<sup>26</sup>. However, the expense of acquiring  
4 and optimizing an EMR system to harness its full potential makes this intervention difficult  
5  
6 to implement, particularly in LMIC settings<sup>27</sup>.  
7  
8  
9

10 Our study identified high and indiscriminate community-based antibiotic use as one  
11 reason why AS is such a challenge at our study site. Variably-enforced regulations on  
12 antibiotic dispensing and the availability of antibiotics without a prescription is a  
13 widespread problem in many countries, including India<sup>28</sup>. The broad and unregulated use of  
14 antibiotics in animal feed and fisheries compounds this barrier<sup>29</sup>. ASP in healthcare settings  
15 can be complemented by AS in the community for all uses of antibiotics, with an inclusive  
16 “One Health” approach to addressing resistance<sup>30</sup>. While not mentioned by any staff,  
17 extensive pollution from pharmaceutical production has also been noted as a driver of  
18 resistant bacteria, and this too should be addressed in a One Health approach<sup>31</sup>. The state  
19 which our study institution exists, Kerala, is currently the only state in India to have an  
20 antibiotic policy. Efforts for federal antibiotic use regulations have some support, but  
21 nothing has yet come to fruition.  
22  
23  
24  
25  
26  
27  
28  
29  
30  
31  
32  
33  
34  
35  
36  
37

38 Our study has limitations. First, this was a single center study. Thus, transferability of  
39 our findings to more resource-limited rural hospitals within India or to other LMIC may not  
40 be possible. Second, we did not conduct direct observations of practice to correlate with self-  
41 reporting. Future studies may identify additional barriers and facilitators by implementing  
42 direct observation approaches to collect data on stewardship practices. We also asked staff  
43 members if they would like to be interviewed, thus introducing the possibility only those  
44 who were really invested in AS would agree.  
45  
46  
47  
48  
49  
50  
51  
52  
53  
54  
55  
56  
57  
58  
59  
60

## Conclusion

The use of the SEIPS model to analyze an ASP in an LMIC identified barriers and facilitators within the healthcare work system. Opportunities for improvement at this institution include increasing accessibility to clinical pharmacists, implementing strategies to overcome physician immunity to change, and establishing a more accessible and complete EMR. Interventions which account for and address barriers and strengthen facilitators should be tested in future studies for their effect on antimicrobial usage and resistance.

## Author Statement

KB created the interview guides, conducted in-person interviews, and wrote, edited, and prepared the manuscript. CS created the interview guides, conducted in-person interviews, and wrote/edited the manuscript. JK edited the manuscript. LK conducted on-site data collection and wrote/edited the manuscript. MVJ assisted with on-site data collection and edited the manuscript. SS devised the project and edited the manuscript. NS obtained funding, devised the project, and edited the manuscript. AS assisted with the grant and edited the manuscript. DS assisted with the grant and wrote/edited the manuscript.

## References

1. United Nations (2016). Political Declaration of the high-level meeting of the General Assembly on antimicrobial resistance. *Bulletin of the General Assembly, Seventy-First Session: Global health and foreign policy*. Available at: [https://digitallibrary.un.org/record/842813/files/A\\_71\\_L-2-EN.pdf](https://digitallibrary.un.org/record/842813/files/A_71_L-2-EN.pdf)
2. Organisation for Economic Co-operation and Development (2016). Antimicrobial resistance: policy insights. Available at: <https://www.oecd.org/health/health-systems/AMR-Policy-Insights-November2016.pdf>
3. Bammigatti, C., Doradla, S., Belgode, H. N., Kumar, H., & Swaminathan, R. P. (2017). Healthcare Associated Infections in a Resource Limited Setting. *Journal of Clinical and*

1  
2  
3                    *Diagnostic Research : JCDR*,                    11(1),                    OC01–OC04.  
4                    <http://doi.org/10.7860/JCDR/2017/23076.9150>  
5  
6

- 7  
8                    4. Barker, A. K., Brown, K., Ahsan, M., Sengupta, S., & Safdar, N. (2017). Social  
9                    determinants of antibiotic misuse: a qualitative study of community members in  
10                    Haryana, India. *BMC Public Health*, 17, 333. [http://doi.org/10.1186/s12889-017-](http://doi.org/10.1186/s12889-017-4261-4)  
11                    4261-4  
12  
13                    5. Barker, A. K., Brown, K., Ahsan, M., Sengupta, S., & Safdar, N. (2017). What drives  
14                    inappropriate antibiotic dispensing? A mixed-methods study of pharmacy employee  
15                    perspectives in Haryana, India. *BMJ Open*, 7(3), e013190.  
16                    <http://doi.org/10.1136/bmjopen-2016-013190>  
17  
18                    6. Gandra, S., Mojica, N., Klein, E. Y., Ashok, A., Nerurkar, V., Kumari, M., Ramesh, U.,  
19                    Sunanda, D., Vadwai, V., Das, B., Laxminarayan, R. (2016). Trends in antibiotic  
20                    resistance among major bacterial pathogens isolated from blood cultures tested at a  
21                    large private laboratory network in India, 2008–2014. *International Journal of*  
22                    *Infectious Diseases*, 50, 75–82. <http://doi.org/10.1016/j.ijid.2016.08.002>  
23  
24                    7. Khety, Z., Mohanta, G., Jain, S., Dawoodi, S. (2017). Changing Antimicrobial Resistance  
25                    Pattern of Isolates from an ICU Over a 3 Year period. *Journal of the Association of*  
26                    *Physicians of India*. 65: 13-16. Available at:  
27                    [japi.org/february\\_2017/02\\_oa\\_changing\\_antimicrobial\\_resistance\\_pattern.pdf](http://japi.org/february_2017/02_oa_changing_antimicrobial_resistance_pattern.pdf)  
28  
29                    8. Moolchandani, K., Sastry, A. S., Deepashree, R., Sistla, S., Harish, B., & Mandal, J. (2017).  
30                    Antimicrobial Resistance Surveillance among Intensive Care Units of a Tertiary Care  
31                    Hospital in Southern India. *Journal of Clinical and Diagnostic Research : JCDR*, 11(2),  
32                    DC01–DC07. <http://doi.org/10.7860/JCDR/2017/23717.9247>  
33  
34                    9. Odsbu, I., Khedkar, S., Lind, F., Khedkar, U., Nerkar, S. S., Orsini, N., Tamhankar, A.J.,  
35                    Stålsby Lundborg, C. (2018). Trends in Resistance to Extended-Spectrum  
36                    Cephalosporins and Carbapenems among *Escherichia coli* and *Klebsiella* spp. Isolates  
37                    in a District in Western India during 2004–2014. *International Journal of*  
38                    *Environmental Research and Public Health*, 15(1), 155.  
39                    <http://doi.org/10.3390/ijerph15010155>  
40  
41                    10. Satyanarayana, S., Kwan, A., Daniels, B., Subbaraman, R., McDowell, A., Bergkvist, S.,  
42                    Das, R.K., Das, V., Das, J., Pai, M. (2016). Use of standardised patients to assess  
43                    antibiotic dispensing for tuberculosis by pharmacies in urban India: a cross-sectional  
44                    study, *The Lancet Infectious Diseases*, 16(11): 1261-1268.  
45                    [https://doi.org/10.1016/S1473-3099\(16\)30215-8](https://doi.org/10.1016/S1473-3099(16)30215-8)  
46  
47                    11. Sharma, M., Damlin, A., Pathak, A., Stålsby Lundborg, C. (2015). Antibiotic Prescribing  
48                    among Pediatric Inpatients with Potential Infections in Two Private Sector Hospitals  
49                    in Central India. *PLOS ONE* 10(11): e0142317.  
50                    <https://doi.org/10.1371/journal.pone.0142317>  
51  
52  
53  
54  
55  
56  
57  
58  
59  
60

12. Infectious Diseases Society of America (2018). Promoting Antimicrobial Stewardship in Human Medicine. Available at: [http://www.idsociety.org/Stewardship\\_Policy/](http://www.idsociety.org/Stewardship_Policy/)
13. Davey, P., Marwick, C., Scott, C.L., Charani, E., McNeil, K., Brown, E., Gould, I.M., Ramsay, C.R., Michie, S. (2017) Interventions to improve antibiotic prescribing practices for hospital inpatients. *Cochrane Database Syst Rev.* 2017 Feb 9 (2). Doi: 10.1002/14651858.CD003543.pub4
14. Pulcini, C., Binda, F., Lamkang, A.S., Trett, A., Charani, E., Goff, D.A., Harbarth, S., Hinrichsen, S.L., Levy-Hara, G., Mendelson, M., Nathwani, D., Gunturu, R., Singh, S., Srinivasan, A., Thamlikitkul, V., Thursky, K., Vlieghe, E., Wertheim, H., Zeng, M., Gandra, S., Laxminarayan, R. (2018). Developing core elements and checklist items for global hospital antimicrobial stewardship programmes: a consensus approach, *Clinical Microbiology and Infection* doi: 10.1016/j.cmi.2018.03.033.
15. Cox J.A., Vlieghe E., Mendelson M., Wertheim H., Ndegwa L., Villegas M.V., Gould I., Levy Hara G. (2017) Antibiotic stewardship in low-and middle-income countries: 'same, but different'?, *Clinical Microbiology and Infection*. doi: 10.1016/j.cmi.2017.07.010
16. Shah, N., Joshi, A., & Ganguly, B. (2017) Impact of Antibiotic Stewardship Program on Prescribing Pattern of Antimicrobials in Patients of Medical Intensive Care Unit. *J Clin. Diagn Res.* July 2017 11(7): 11-15 doi: [10.7860/JCDR/2017/27171.10237](https://doi.org/10.7860/JCDR/2017/27171.10237)
17. Shafiq, N., Praveen Kumar, M., Gautam, V. et al. (2016). Antibiotic stewardship in a tertiary care hospital of a developing country: establishment of a system and its application in a unit--GASP Initiative. *Infection* 44(5): 651-659. <https://doi.org/10.1007/s15010-016-0913-z>
18. Ravi, N., Laha, A., Hmar, L., Chatterjee, S., Goswami, J., Goel, G., Dhar, K., Ghosh, T., Chatterjee, S., Datta, S.S., Bhattacharya, S. (2017). Exploring the prescribing behaviours and the mind of antibiotic prescribers is critical for a successful antibiotic stewardship program: Results of a survey from Eastern India. *Indian Journal of Medical Microbiology*, 35(2): 299-301. Doi: 10.4103/ijmm.IJMM\_17\_133.
19. Carayon, P., Schoofs Hundt, A., Karsh, B., Gurses, A., Alvarado, C., Smith, M., Flatley Brennan P. (2006). Work system design for patient safety: the SEIPS model. *BMJ Quality & Safety* 2006; 15: 50-58. <http://dx.doi.org/10.1136/qshc.2005.015842>
20. O'Brien BC, Harris IB, Beckman TJ, Reed DA, Cook DA. Standards for reporting qualitative research: a synthesis of recommendations. *Acad Med.* 2014;89(9):1245-1251.

- 1  
2  
3  
4  
5  
6  
7  
8  
9  
10  
11  
12  
13  
14  
15  
16  
17  
18  
19  
20  
21  
22  
23  
24  
25  
26  
27  
28  
29  
30  
31  
32  
33  
34  
35  
36  
37  
38  
39  
40  
41  
42  
43  
44  
45  
46  
47  
48  
49  
50  
51  
52  
53  
54  
55  
56  
57  
58  
59  
60
21. Rimawi, R.H., Mazer, M.A., Siraj, D.S., Gooch, M., Cook, P.P. (2013). "Impact of Regular Collaboration between Infectious Diseases and Critical Care Practitioners on Antimicrobial Utilization and Patient Outcome." *Crit Care Med.* 2013 Sep;41(9):2099-107.
  22. Oxman, D.A., Adams, C.D. Deluke, G., et al. (2015). Improving Antibiotic De-Escalation in Suspected Ventilator-Associated Pneumonia: An Observational Study With a Pharmacist-Driven Intervention. *Journal of Pharmacy Practice* . Vol 28, Issue 5, pp. 457 – 461. doi: 10.1177/0897190014527316
  23. Stålsby Lundborg C., Tamhankar A.J. (2014). Understanding and changing human behaviour—antibiotic mainstreaming as an approach to facilitate modification of provider and consumer behaviour. *Uppsala Journal of Medical Sciences.* 2014;119(2):125-133. doi:10.3109/03009734.2014.905664.
  24. Charani, E; Edwards, R; Sevdalis, N; et al. Behavior Change Strategies to Influence Antimicrobial Prescribing in Acute Care: A Systematic Review, *Clinical Infectious Diseases*, Volume 53, Issue 7, 1 October 2011, Pages 651–662.
  25. Livorsi, D., Comer, A., Matthias, M., Perencevich, E., Bair, M. (2015). Factors influencing antibiotic-prescribing decisions among inpatient physicians: a qualitative investigation. *Infection control and hospital epidemiology.* 2015;36(9):1065-1072. doi:10.1017/ice.2015.136.
  26. Jawhari, B., Keenan, L., Zakus, D., et al. (2016). Barriers and facilitators to Electronic Medical Record (EMR) use in an urban slum. *International Journal of Medical Informatics.* Volume 94, October 2016, Pages 246-254.
  27. Forrest, G; Van Schooneveld, T; Kullar, R; et al. (2014). Use of Electronic Health Records and Clinical Decision Support Systems for Antimicrobial Stewardship, *Clinical Infectious Diseases*, Volume 59, Issue 3, Pages S122–S133.
  28. Shet A, Sundaresan S, Forsberg BC. Pharmacy-based dispensing of antimicrobial agents without prescription in India: appropriateness and cost burden in the private sector. *Antimicrobial Resistance and Infection Control.* 2015;4:55. doi:10.1186/s13756-015-0098-8.
  29. Chang Q, Wang W, Regev-Yochay G, Lipsitch M, Hanage WP. Antibiotics in agriculture and the risk to human health: how worried should we be? *Evolutionary Applications.* 2015;8(3):240-247. doi:10.1111/eva.12185.
  30. Centers for Disease Control (2017). One Health Basics. Available at: <https://www.cdc.gov/onehealth/basics/index.html>
  31. Lübbert, C., Baars, C., Dayakar, A. et al. Environmental pollution with antimicrobial agents from bulk drug manufacturing industries in Hyderabad, South India, is associated with dissemination of extended-spectrum beta-lactamase and carbapenemase-producing pathogens. *Infection* (2017) 45: 479. Doi: 10.1007/s15010-017-1007-2

**Table 1.** Themes identified from SEIPS components with corresponding representative quotations

| Theme                                    | Representative Quote                                                                                                                                                                                                                                                                                                                                               |
|------------------------------------------|--------------------------------------------------------------------------------------------------------------------------------------------------------------------------------------------------------------------------------------------------------------------------------------------------------------------------------------------------------------------|
| <b>Organization</b>                      |                                                                                                                                                                                                                                                                                                                                                                    |
| <i>Antimicrobial Stewardship Program</i> | 1. "We audit to make sure the right indication is happening. We check to see the dosage is correct and monitor what's happening here to track our prescriptions." (pharmacist)                                                                                                                                                                                     |
|                                          | 2. "Every year we do something with the antibiotic prescription program. Along with infection control. Usually a three-day program for doctors and one day is dedicated to antibiotic stewardship. Speakers from all over the country [come] and we take about 30-35 doctors a year and try to teach them about antibiotic stewardship." (infection control nurse) |
|                                          | 3. "The medical superintendent is a part of our team. I don't think you can get much higher up than that. The management is very supportive." (pharmacist)                                                                                                                                                                                                         |
| <i>Microbiology laboratory</i>           | 4. "Our microbiology lab is one of the best in the country. They are very reliable and help us immensely." (physician)                                                                                                                                                                                                                                             |

|                                                |                                                                                                                                                                                                                                                                                                                                                                                                                                                                                                                                                                          |
|------------------------------------------------|--------------------------------------------------------------------------------------------------------------------------------------------------------------------------------------------------------------------------------------------------------------------------------------------------------------------------------------------------------------------------------------------------------------------------------------------------------------------------------------------------------------------------------------------------------------------------|
|                                                | <p>5. "Whenever the lab grows something in the culture, could be six hours, ten hours, we are called and told. So that does impact our management. If we are thinking about a gram positive illness and we get a culture that's gram negative, which is grown very quickly, we totally change our report. We are informed pretty quickly." (physician)</p>                                                                                                                                                                                                               |
| <p><i>Clinical pharmacist availability</i></p> | <p>6. "[Pharmacists are] not routinely in the ICU. I wish more pharmacists would tell physicians their doses or their drug interactions are wrong, but I don't see them in the cardiac or pediatric ICU." (physician)</p> <p>7. "We have one pharmacist in our ICU, she visits. The problem with her is she's overworked. She's alone. She comes on the rounds only sometimes and comes around and checks the antibiotics dosing is correct. But duration and all others are decided by physicians. If there were more of them it would be much better." (physician)</p> |
|                                                | <p>8. "If a clinician is working alone, we may not have much concern about things that pharmacists are more aware of, like drug interactions. Routine medications may have interactions also, so pharmacists' help is needed. That type of information is more with the pharmacists, not the clinicians. They are not always available." (physician)</p>                                                                                                                                                                                                                 |
| <p><b>Person</b></p>                           |                                                                                                                                                                                                                                                                                                                                                                                                                                                                                                                                                                          |
| <p><i>Antibiotic stewardship knowledge</i></p> | <p>9. "Antibiotic stewardship is a standardized practice with the right treatment at the right time." (physician)</p>                                                                                                                                                                                                                                                                                                                                                                                                                                                    |

|                                                                |                                                                                                                                                                                                                                                                                                                                                                            |
|----------------------------------------------------------------|----------------------------------------------------------------------------------------------------------------------------------------------------------------------------------------------------------------------------------------------------------------------------------------------------------------------------------------------------------------------------|
|                                                                | 10. "To me antibiotic stewardship is to start judicious antibiotics...I won't say to start low antibiotics, I say to start optimum antibiotics." (physician)                                                                                                                                                                                                               |
|                                                                | 11. "Most of us here are aware of these ideas. For us, it's about everything that has to do with a prescription. The ultimate aim is judicious use of antibiotics. We need to use the right antibiotics, the right dose." (physician)                                                                                                                                      |
| <i>Physician resistance to antibiotic stewardship policies</i> | 12. "I think clinicians are empowered to think that they know best. They need to recognize the roles of the microbiologists and the pharmacists and should not feel low that they have asked for help." (physician)                                                                                                                                                        |
|                                                                | 13. "Challenges come from navigating human behavior. Sometimes you'll recommend things but people just won't listen to you." (infection control nurse)                                                                                                                                                                                                                     |
| <b>Tasks</b>                                                   |                                                                                                                                                                                                                                                                                                                                                                            |
| <i>Antibiotic prescribing</i>                                  | 14. "We have a high patient load and socioeconomic status is a big deal. Poverty and malnourished children are a reality. We can't wait for cultures. We have protocols to start them on antibiotics according to which ones have been most successful here." (physician)                                                                                                  |
|                                                                | 15. "I think it's a problem all over India, because the first antibiotics they prescribe is the carbapenems. And once they prescribe it is never de-escalated or rarely de-escalated. Basically they go, 'let's continue. What the culture says? I don't want to do that. Let's just continue because he's improving.' So it's a major, major, major problem." (physician) |



|                                         |                                                                                                                                                                                                                                                                                                                                                                                                                                                      |
|-----------------------------------------|------------------------------------------------------------------------------------------------------------------------------------------------------------------------------------------------------------------------------------------------------------------------------------------------------------------------------------------------------------------------------------------------------------------------------------------------------|
| <p><i>Workload</i></p>                  | <p>16. "Sometimes we are busy and we forget pre admission drugs which are missed because we are more worried about the current problems, and there are so many the patient is already on, that we need to continue." (physician)</p>                                                                                                                                                                                                                 |
|                                         | <p>17. "Our work here does affect how long you can spend on individual cases." (infection control nurse)</p>                                                                                                                                                                                                                                                                                                                                         |
| <p><b>Tools and Technology</b></p>      |                                                                                                                                                                                                                                                                                                                                                                                                                                                      |
| <p><i>Antibiogram</i></p>               | <p>18. "It is an annual antibiogram. We divide it into gram positive, gram negative, and yeast. We also have a blood gram positive from blood isolates, negative, and yeast. They are separate. We follow international guidelines so for any isolate that is more than 30, we take them and follow the rules. Every year it is updated. This year they are trying to involve more pharmacists" (infection control nurse)</p>                        |
| <p><i>Electronic medical record</i></p> | <p>19. "If I look today at the record, I can only see what they took today. The current medications only. Not what they got yesterday. I can't trace the meropenem. To see all the drugs we have to go to the paper medical record room. It's a very tedious process. We don't know the dose or duration or all the drugs...if the patient returns in a few weeks, we don't know what they were taking and what will be effective." (pharmacist)</p> |
|                                         | <p>20. "I see 80 patients a day. So it's not possible for me to spend so much time logging in, recording all this. I don't think it's possible unless I had someone sitting next to me doing just that." (physician)</p>                                                                                                                                                                                                                             |

| <b>Environment</b>                                                 |                                                                                                                                                                                                                                                                                                                                                                        |
|--------------------------------------------------------------------|------------------------------------------------------------------------------------------------------------------------------------------------------------------------------------------------------------------------------------------------------------------------------------------------------------------------------------------------------------------------|
| <i>Posters or signs promoting antibiotic stewardship awareness</i> | 21. "It's only in protocols, which we do print out only for doctors. Nurses don't see that." (physician)                                                                                                                                                                                                                                                               |
|                                                                    | 22. "We have some print-outs on our notice board about colistin and other higher-end antibiotics...but we don't have posters. As for the printouts, they aren't that catchy." (physician)                                                                                                                                                                              |
| <i>High levels of community antibiotic use</i>                     | 23. "Outside the hospital this is a rampant problem in India. There is much abuse and misuse of antibiotics. Anyone can just go to a roadside pharmacy and describe their symptoms and get antibiotics over the counter just like that. They just go to the guy sitting there and get whatever. I think we should make it much harder to get antibiotics." (physician) |

Frequently used abbreviations:

LMIC: low and middle income countries

ASP: antibiotic stewardship program

AS: antibiotic stewardship

SEIPS: Systems Engineering Initiative for Patient Safety

EMR: electronic medical record

## Appendix A: Antibiotic Stewardship Interview Questions

Interviewer: Antibiotic stewardship refers to the judicious use of antibiotics, and is a critical component of reducing antibiotic resistance. Components of antibiotic stewardship involve drug expertise, evaluating ongoing antibiotic treatment, monitoring prescribing practices, and reporting information on antibiotic use and resistance.

Your responses will be recorded with a voice recorder and transcribed, but the responses will be de-identified in any data set and your identity will be kept confidential.

### *Person*

1. How do you define antibiotic stewardship?
2. What do you think of antibiotic stewardship as an infectious disease prevention strategy?
3. Describe your level of interaction working with infectious disease specialists at your hospital.
4. Physician/Nurse
  - a. Describe your work with pharmacists in your hospital.
    - i. If poor availability/they don't work with pharmacists: What factors limit their availability to you?
    - ii. How do you work with pharmacists on specific patients?
    - iii. In an ideal situation, what would be different about how you work with the pharmacists?
  - b. Tell me about your workload.
    - i. How does your workload impact your ability to complete your job responsibilities?
5. All clinicians: Describe employee turnover on your ward

### *Organization*

1. Describe your experience regarding antimicrobial stewardship education in your facility.
  - a. What is your view of these trainings (how likely are you to attend? Do you apply the information to your practice? Who attends?)?
2. What do you hear about antimicrobial stewardship at work?
3. Describe a time a new policy was implemented on your ward/in your lab.
  - a. What challenges were encountered? What went well? How did this compare to other times when new policies were implemented?
  - b. How were staff involved in the development of the new policy? How are they typically involved in policy development?
4. Tell me about your interactions with people involved in the antibiotic stewardship program.
  - a. What types of things do you collaborate on/communicate about?
  - b. How could your interactions be improved?
5. What is your sense of how hospital leaders/management are involved in antibiotic stewardship efforts in your ward/lab?

6. All clinicians: How could antibiotic prescribing be improved in your facility? Tell me about empiric prescribing at your hospital. What factors should be considered when prescribing an antibiotic if the cause of illness is not yet known?

### *Tasks*

1. Lab Staff
  - a. Describe how you create an antibiogram.
    - i. How does creating an antibiogram fit in with your other job responsibilities?
    - ii. How often do you update the antibiogram?
    - iii. What is the scope of the antibiogram?
2. Nurses
  - a. What antibiotic stewardship practices are you responsible for on your ward?
  - b. How often do you review medications? Describe your review process.
  - c. What do you do when antibiotic usage seems questionable? Do you or your team decide together?
  - d. Are routine audits of antibiotic use conducted on your ward?
3. Pharmacists
  - a. What is your process when an antibiotic is ordered?
    - i. What are your selection review practices? Describe your collaboration with physicians.
    - ii. Describe your antibiogram use, including successes and challenges. How frequently is it updated?
4. Physicians
  - a. Describe your antibiotic selection process, including any guidelines you may use in making your decision.
    - i. Describe your antibiogram use, including successes and challenges. How frequently is it updated?
    - ii. How often are those guidelines adhered to in your workplace? If infrequently, what are the barriers to adherence?
  - b. Describe your review of antibiotic selection, including after the drug has been prescribed and after you have obtained culture results.
5. All clinicians: Where do you store information on antibiotic use (dosage, duration, indication)?
6. All clinicians: How often/how many cases of treatment failure related to resistance have you seen?
7. All staff: Evaluate the effect of your workload on your ability to implement antibiotic stewardship activities.
8. Describe what (if any) antibiotic resistance has had on your practice.
9. Describe what (if any) antibiotic resistance has had on your community.
10. What do you think would be the most useful strategies to help decrease antibiotic use?

### *Tools and Technology*

1. All clinicians: How do you determine a patient's antibiotic use status?

- 1
- 2
- 3 a. What resources or tools do you use to decide which antibiotic is most appropriate
- 4 for a patient?
- 5
- 6 2. Physicians and maybe pharmacists:
- 7 a. How does the lab impact your antibiotic prescribing?
- 8
- 9 3. Lab staff: What changes could be made to your lab that would help you to more
- 10 effectively support antibiotic prescribing/stewardship at your hospital?

### 11 *Environment*

12

13 What posters, signs, or other visual cues promoting good antibiotic prescribing are

14 present in your hospital? Where are they located? Which ones do you notice most?

15

16

17 Final: Is there anything I haven't asked you about antibiotic stewardship that you think is

18 important for me to know?

19

20

21

22

23

24

25

26

27

28

29

30

31

32

33

34

35

36

37

38

39

40

41

42

43

44

45

46

47

48

49

50

51

52

53

54

55

56

57

58

59

60

# Reporting checklist for qualitative study.

Based on the SRQR guidelines.

## Instructions to authors

Complete this checklist by entering the page numbers from your manuscript where readers will find each of the items listed below.

Your article may not currently address all the items on the checklist. Please modify your text to include the missing information. If you are certain that an item does not apply, please write "n/a" and provide a short explanation.

Upload your completed checklist as an extra file when you submit to a journal.

In your methods section, say that you used the SRQR reporting guidelines, and cite them as:

O'Brien BC, Harris IB, Beckman TJ, Reed DA, Cook DA. Standards for reporting qualitative research: a synthesis of recommendations. *Acad Med.* 2014;89(9):1245-1251.

|                                            | Reporting Item                                                                                                                                                                                                                                          | Page Number |
|--------------------------------------------|---------------------------------------------------------------------------------------------------------------------------------------------------------------------------------------------------------------------------------------------------------|-------------|
|                                            | <a href="#">#1</a> Concise description of the nature and topic of the study identifying the study as qualitative or indicating the approach (e.g. ethnography, grounded theory) or data collection methods (e.g. interview, focus group) is recommended | 5           |
|                                            | <a href="#">#2</a> Summary of the key elements of the study using the abstract format of the intended publication; typically includes background, purpose, methods, results and conclusions                                                             | 2           |
| Problem formulation                        | <a href="#">#3</a> Description and significance of the problem / phenomenon studied: review of relevant theory and empirical work; problem statement                                                                                                    | 3           |
| Purpose or research question               | <a href="#">#4</a> Purpose of the study and specific objectives or questions                                                                                                                                                                            | 2           |
| Qualitative approach and research paradigm | <a href="#">#5</a> Qualitative approach (e.g. ethnography, grounded theory, case study, phenomenology, narrative research) and guiding theory if appropriate; identifying the                                                                           | 5           |

research paradigm (e.g. postpositivist, constructivist / interpretivist) is also recommended; rationale. The rationale should briefly discuss the justification for choosing that theory, approach, method or technique rather than other options available; the assumptions and limitations implicit in those choices and how those choices influence study conclusions and transferability. As appropriate the rationale for several items might be discussed together.

|    |                     |                                                           |                 |
|----|---------------------|-----------------------------------------------------------|-----------------|
| 1  |                     |                                                           |                 |
| 2  |                     |                                                           |                 |
| 3  |                     |                                                           |                 |
| 4  |                     |                                                           |                 |
| 5  |                     |                                                           |                 |
| 6  |                     |                                                           |                 |
| 7  |                     |                                                           |                 |
| 8  |                     |                                                           |                 |
| 9  |                     |                                                           |                 |
| 10 |                     |                                                           |                 |
| 11 |                     |                                                           |                 |
| 12 |                     |                                                           |                 |
| 13 |                     |                                                           |                 |
| 14 | Researcher          | <a href="#">#6</a>                                        |                 |
| 15 | characteristics and | Researchers' characteristics that may influence the       | n/a. The team   |
| 16 | reflexivity         | research, including personal attributes, qualifications / | did not feel    |
| 17 |                     | experience, relationship with participants, assumptions   | any             |
| 18 |                     | and / or presuppositions; potential or actual interaction | characteristics |
| 19 |                     | between researchers' characteristics and the research     | dramatically    |
| 20 |                     | questions, approach, methods, results and / or            | influenced our  |
| 21 |                     | transferability                                           | devising of     |
| 22 |                     |                                                           | the interview   |
| 23 |                     |                                                           | guide or the    |
| 24 |                     |                                                           | data            |
| 25 |                     |                                                           | collection.     |
| 26 |                     |                                                           |                 |
| 27 |                     |                                                           |                 |
| 28 |                     |                                                           |                 |
| 29 |                     |                                                           |                 |
| 30 |                     |                                                           |                 |
| 31 | Context             | <a href="#">#7</a>                                        | 4               |
| 32 |                     | Setting / site and salient contextual factors; rationale  |                 |
| 33 |                     |                                                           |                 |
| 34 | Sampling strategy   | <a href="#">#8</a>                                        | 5               |
| 35 |                     | How and why research participants, documents, or          |                 |
| 36 |                     | events were selected; criteria for deciding when no       |                 |
| 37 |                     | further sampling was necessary (e.g. sampling             |                 |
| 38 |                     | saturation); rationale                                    |                 |
| 39 |                     |                                                           |                 |
| 40 |                     |                                                           |                 |
| 41 | Ethical issues      | <a href="#">#9</a>                                        | 6               |
| 42 | pertaining to human | Documentation of approval by an appropriate ethics        |                 |
| 43 | subjects            | review board and participant consent, or explanation      |                 |
| 44 |                     | for lack thereof; other confidentiality and data security |                 |
| 45 |                     | issues                                                    |                 |
| 46 |                     |                                                           |                 |
| 47 | Data collection     | <a href="#">#10</a>                                       | 5               |
| 48 | methods             | Types of data collected; details of data collection       |                 |
| 49 |                     | procedures including (as appropriate) start and stop      |                 |
| 50 |                     | dates of data collection and analysis, iterative process, |                 |
| 51 |                     | triangulation of sources / methods, and modification of   |                 |
| 52 |                     | procedures in response to evolving study findings;        |                 |
| 53 |                     | rationale                                                 |                 |
| 54 |                     |                                                           |                 |
| 55 |                     |                                                           |                 |
| 56 |                     |                                                           |                 |
| 57 | Data collection     | <a href="#">#11</a>                                       | Appendix 1      |
| 58 |                     | Description of instruments (e.g. interview guides,        |                 |
| 59 |                     |                                                           |                 |
| 60 |                     |                                                           |                 |

|                                                          |                                                                                              |                                                                                                                                                                                                                                                                                                                              |       |
|----------------------------------------------------------|----------------------------------------------------------------------------------------------|------------------------------------------------------------------------------------------------------------------------------------------------------------------------------------------------------------------------------------------------------------------------------------------------------------------------------|-------|
| 1<br>2<br>3<br>4                                         | instruments and technologies                                                                 | questionnaires) and devices (e.g. audio recorders) used for data collection; if / how the instruments(s) changed over the course of the study                                                                                                                                                                                |       |
| 5<br>6<br>7<br>8<br>9                                    | Units of study                                                                               | <a href="#">#12</a> Number and relevant characteristics of participants, documents, or events included in the study; level of participation (could be reported in results)                                                                                                                                                   | 5     |
| 10<br>11<br>12<br>13<br>14<br>15<br>16<br>17<br>18       | Data processing                                                                              | <a href="#">#13</a> Methods for processing data prior to and during analysis, including transcription, data entry, data management and security, verification of data integrity, data coding, and anonymisation / deidentification of excerpts                                                                               | 6     |
| 19<br>20<br>21<br>22<br>23<br>24<br>25                   | Data analysis                                                                                | <a href="#">#14</a> Process by which inferences, themes, etc. were identified and developed, including the researchers involved in data analysis; usually references a specific paradigm or approach; rationale                                                                                                              | 6     |
| 26<br>27<br>28<br>29<br>30                               | Techniques to enhance trustworthiness                                                        | <a href="#">#15</a> Techniques to enhance trustworthiness and credibility of data analysis (e.g. member checking, audit trail, triangulation); rationale                                                                                                                                                                     | 6     |
| 31<br>32<br>33<br>34<br>35                               | Syntheses and interpretation                                                                 | <a href="#">#16</a> Main findings (e.g. interpretations, inferences, and themes); might include development of a theory or model, or integration with prior research or theory                                                                                                                                               | 6     |
| 36<br>37<br>38<br>39                                     | Links to empirical data                                                                      | <a href="#">#17</a> Evidence (e.g. quotes, field notes, text excerpts, photographs) to substantiate analytic findings                                                                                                                                                                                                        | 18-22 |
| 40<br>41<br>42<br>43<br>44<br>45<br>46<br>47<br>48<br>49 | Intergration with prior work, implications, transferability and contribution(s) to the field | <a href="#">#18</a> Short summary of main findings; explanation of how findings and conclusions connect to, support, elaborate on, or challenge conclusions of earlier scholarship; discussion of scope of application / generalizability; identification of unique contributions(s) to scholarship in a discipline or field | 12    |
| 50<br>51                                                 | Limitations                                                                                  | <a href="#">#19</a> Trustworthiness and limitations of findings                                                                                                                                                                                                                                                              | 12    |
| 52<br>53<br>54<br>55<br>56<br>57                         | Conflicts of interest                                                                        | <a href="#">#20</a> Potential sources of influence of perceived influence on study conduct and conclusions; how these were managed                                                                                                                                                                                           | 1     |
| 58<br>59<br>60                                           | Funding                                                                                      | <a href="#">#21</a> Sources of funding and other support; role of funders                                                                                                                                                                                                                                                    | 1     |



in data collection, interpretation and reporting

The SRQR checklist is distributed with permission of Wolters Kluwer © 2014 by the Association of American Medical Colleges. This checklist can be completed online using <https://www.goodreports.org/>, a tool made by the [EQUATOR Network](#) in collaboration with [Penelope.ai](#)

For peer review only
